# Supplementary material for: Imaging Genetic Based Mediation Analysis for Human Cognition
Source: Front Neurosci. 2022 Apr 28;16:824069. doi: 10.3389/fnins.2022.824069 (PMC9097855; doi:10.3389/fnins.2022.824069)
Supplement: Supplementary file 2 [file Table_2.XLSX]

## Sheet: ReadEng
SNP	Direct Effect	P-value of DE	Indirect effect	p-value of beta_k	p-value of alpha_k	p-value of beta_l	p-value of alpha_l	Percentage of Global effect explained by connectome
rs79720263	9.9466	2.38093e-05	0.481876	1.19205e-05	0.165666	NA	NA	4.62078
rs11572851	6.65419	0.000417661	-0.543115	6.29384e-06	0.0594946	NA	NA	7.54609
rs116785568	-17.9289	0.000582217	0.996583	2.31679e-07	0.272684	NA	NA	5.26582
rs113673946	6.32335	0.00124132	-0.53411	1.80244e-05	0.0600061	NA	NA	7.78874
rs9342351	2.17275	0.00417395	-0.204824	1.31818e-05	0.0669769	NA	NA	8.61481
rs151161585	16.9051	0.00432667	1.42205	5.59979e-06	0.117987	NA	NA	7.75922
rs111660869	6.01927	0.00482663	-0.573363	1.3649e-05	0.0681399	NA	NA	8.69703
rs12427819	3.61844	0.0057787	-0.0544458	3.4945e-08	0.823157	NA	NA	1.48237
rs114357990	12.777	0.00654117	-1.30547	6.56972e-06	0.0684248	NA	NA	9.27018
rs17128467	2.9461	0.0111188	-0.0382312	1.30542e-06	0.840332	NA	NA	1.28106
rs138291276	-8.55697	0.011202	1.41256	3.45763e-07	0.0151073	NA	NA	14.1687
rs78383629	-11.5149	0.0137532	-0.797038	4.59049e-06	0.272247	NA	NA	6.47368
rs187428364	8.08908	0.0167348	-0.928671	4.83782e-06	0.075819	NA	NA	10.2983
rs4877985	3.65406	0.0168972	0.367934	1.75342e-05	0.0980462	NA	NA	9.14803
rs112533857	7.16502	0.0202673	-0.858453	5.35973e-06	0.0712447	NA	NA	10.6993
rs9568202	2.52709	0.0207227	0.267343	1.33575e-05	0.0969518	NA	NA	9.56699
rs79021915	-9.33352	0.0212028	-0.660285	3.92555e-06	0.29629	NA	NA	6.60694
rs79490573	13.674	0.0216898	-1.51566	1.60879e-05	0.0814868	NA	NA	9.97823
rs114583383	-11.813	0.0242851	0.844722	1.02873e-07	0.369798	NA	NA	6.67356
rs115895926	-11.813	0.0242851	0.844722	1.02873e-07	0.369798	NA	NA	6.67356
rs8009460	4.09697	0.0246215	-0.0170524	3.71576e-06	0.952318	NA	NA	0.414495
rs79152278	-5.5864	0.0274425	0.355781	1.1892e-06	0.392295	NA	NA	5.98737
rs1986382	1.19628	0.0274473	0.134141	4.51778e-06	0.113582	NA	NA	10.0826
rs1408282	1.74035	0.029973	-0.20064	1.7829e-05	0.0851012	NA	NA	10.337
rs114744690	7.51816	0.0304971	0.886697	6.14826e-06	0.0954516	NA	NA	10.5498
rs79993170	-1.86098	0.0325685	0.323137	2.67768e-06	0.0195518	NA	NA	14.7949
rs139827215.COSV55097108	-15.3986	0.0359352	1.01497	7.83482e-07	0.40776	NA	NA	6.18375
rs17499798	-15.3701	0.0362039	1.03485	7.45689e-07	0.399089	NA	NA	6.30815
rs17500264	-15.3701	0.0362039	1.03485	7.45689e-07	0.399089	NA	NA	6.30815
rs11998041	2.98461	0.0423113	-0.386359	7.36306e-06	0.083887	NA	NA	11.4614
rs147366834	-10.5793	0.0429489	0.795408	1.26001e-07	0.393666	NA	NA	6.9928
rs188238736	-14.7946	0.0444822	0.987611	1.35614e-06	0.411483	NA	NA	6.25775
rs79047578	-14.7946	0.0444822	0.987611	1.35614e-06	0.411483	NA	NA	6.25775
rs138024882	-10.4998	0.0515282	-0.950529	1.58041e-06	0.277615	NA	NA	8.30135
rs76363034	-10.4998	0.0515282	-0.950529	1.58041e-06	0.277615	NA	NA	8.30135
rs799240	6.53335	0.0532085	-0.863956	7.80778e-06	0.091467	NA	NA	11.6793
rs73954229	-11.5542	0.055644	0.826683	6.50742e-07	0.415476	NA	NA	6.67712
rs799240.1	6.46519	0.0559665	-0.861165	8.64007e-06	0.0916348	NA	NA	11.7543
rs7880476	-0.908054	0.0587315	0.00191715	7.98724e-07	0.980913	NA	NA	0.210683
rs4580909	2.51251	0.0596506	0.340199	1.22481e-05	0.0853616	NA	NA	11.9255
rs139978877	13.7142	0.0612707	-1.90092	5.86237e-06	0.090898	NA	NA	12.1736
rs73630199	-7.88894	0.0616893	-0.766504	4.73916e-06	0.24189	NA	NA	8.85574
rs5921578	1.66866	0.0625756	0.0235276	2.60985e-08	0.888778	NA	NA	1.39037
rs865885084	-4.75488	0.0633776	-0.646831	1.60562e-05	0.0839953	NA	NA	11.9746
rs190535783	-5.79895	0.0642911	-0.519788	1.59531e-05	0.256443	NA	NA	8.22613
rs61735358.COSV99877644	5.48666	0.0656522	0.759042	1.35443e-05	0.0840757	NA	NA	12.153
rs138843033	-9.71219	0.0656648	1.93901	2.12676e-06	0.0220937	NA	NA	16.6422
rs117384094	-6.07215	0.0658651	1.24829	7.71435e-07	0.0239613	NA	NA	17.0521
rs77398130	4.38875	0.0691897	-0.588338	1.66939e-05	0.09491	NA	NA	11.8209
rs149175148	-13.1205	0.0732063	2.41506	1.66971e-05	0.0238723	NA	NA	15.5454
rs76311122	-2.89536	0.0739333	-0.270517	1.64947e-05	0.252461	NA	NA	8.54476
rs201135092	2.21842	0.0742559	0.324812	7.93735e-06	0.0840941	NA	NA	12.7716
rs28688016	4.85441	0.0784803	-0.848719	1.06547e-07	0.086743	NA	NA	14.8816
rs149111244	-7.55957	0.079845	1.52938	3.99498e-06	0.0233319	NA	NA	16.8268
rs557069225	5.45905	0.0810704	-0.754421	1.65074e-05	0.0987808	NA	NA	12.1417
rs1990985	4.38608	0.0823049	-0.731383	4.3727e-07	0.0899209	NA	NA	14.2919
rs113713560	-6.85186	0.0832129	1.32933	1.09726e-05	0.0241513	NA	NA	16.2486
rs182225157	-10.4912	0.0881555	-1.13791	1.01357e-06	0.263299	NA	NA	9.78505
rs73981631	3.87451	0.0922987	0.59446	1.32364e-05	0.0801629	NA	NA	13.3019
rs72553952	-5.89294	0.0936432	0.394323	1.21035e-06	0.494564	NA	NA	6.27177
rs77536728	-8.68938	0.094727	0.832763	1.69126e-06	0.0218257	3.89671e-06	0.000975491	8.74554
rs187863221	-17.2531	0.0956836	1.31569	2.5305e-06	0.0120747	6.12926e-06	0.00078324	7.08548
rs114313699	-4.3718	0.0957535	-0.682463	1.53346e-05	0.0762973	NA	NA	13.5027
rs117559981	-17.2527	0.0958434	1.12919	2.19621e-06	0.0189384	6.17916e-06	0.00192674	6.14296
rs372042	1.16436	0.0960997	0.181419	1.56179e-05	0.0767202	NA	NA	13.4806
rs79930079	12.08	0.0961289	1.93294	6.44006e-06	0.0814538	NA	NA	13.794
rs114047728	-10.271	0.0979061	0.969619	1.03957e-08	0.418347	NA	NA	8.626
rs1486830	-4.17303	0.0979977	0.878108	4.98166e-06	0.0244228	NA	NA	17.3844
rs78023683	-12.1098	0.0984012	-1.27296	8.97877e-06	0.24794	NA	NA	9.51192
rs144809614	-17.132	0.0984111	1.21151	2.41709e-06	0.0184423	6.06883e-06	0.00166293	6.60458
rs147531239.COSV104570516	8.5305	0.0991776	-1.25851	1.31502e-05	0.0994475	NA	NA	12.8564
rs185478723	-17.0674	0.100538	0.835655	2.56296e-06	0.0133326	7.26989e-06	0.00212047	4.66766
rs149181623	-17.0641	0.101041	1.08511	2.40722e-06	0.0149312	6.30812e-06	0.00160723	5.97882
rs79168666	-17.0505	0.101407	1.14739	2.39107e-06	0.0162831	6.17487e-06	0.00160078	6.30509
rs114834396	4.7069	0.10182	0.766213	6.79723e-06	0.0806023	NA	NA	13.9996
rs150113374	-17.0092	0.101874	0.992158	2.35395e-06	0.0156024	6.92502e-06	0.00190817	5.51157
rs2234322	-17.0114	0.102188	1.09864	2.4078e-06	0.0168657	6.08399e-06	0.00185604	6.06645
rs117187571	-16.9842	0.102207	1.04422	2.44532e-06	0.0160269	6.12873e-06	0.00192266	5.79207
rs77836279	-16.9803	0.102312	1.09917	2.50242e-06	0.0171085	6.19113e-06	0.00189148	6.07967
rs143116789	-16.9812	0.102423	1.0543	2.34597e-06	0.0152828	5.94184e-06	0.00177421	5.84571
rs117199719	-16.9613	0.102592	1.04766	2.4367e-06	0.0150381	6.03083e-06	0.0017685	5.81742
rs117103348	-16.9613	0.102592	1.04766	2.4367e-06	0.0150381	6.03083e-06	0.0017685	5.81742
rs183179229	-16.9613	0.102592	1.04766	2.4367e-06	0.0150381	6.03083e-06	0.0017685	5.81742
rs80052321	-16.9613	0.102592	1.04766	2.4367e-06	0.0150381	6.03083e-06	0.0017685	5.81742
rs1107711	-16.9613	0.102592	1.04766	2.4367e-06	0.0150381	6.03083e-06	0.0017685	5.81742
rs143071035	-16.9613	0.102592	1.04766	2.4367e-06	0.0150381	6.03083e-06	0.0017685	5.81742
rs143938519	-16.9613	0.102592	1.04766	2.4367e-06	0.0150381	6.03083e-06	0.0017685	5.81742
rs141273274.COSV62292497	-16.9613	0.102592	1.04766	2.4367e-06	0.0150381	6.03083e-06	0.0017685	5.81742
rs142910242.COSV72155897	-16.9549	0.102728	1.19322	2.59029e-06	0.0190423	6.7841e-06	0.0017764	6.57489
rs148032509	-16.8631	0.102963	1.22027	2.34849e-06	0.0145942	6.52005e-06	0.00114381	6.74803
rs117742494	-16.9509	0.102997	1.06325	2.63341e-06	0.0153597	6.5126e-06	0.00174933	5.90227
rs117776875	-17.0281	0.103199	1.04791	2.24865e-06	0.026271	6.26303e-06	0.00356282	5.79723
rs79799102.COSV50773771	-16.9319	0.103486	1.01616	2.46753e-06	0.0151309	6.00826e-06	0.0019114	5.66169
rs138680262	-16.9225	0.103489	0.992917	2.4392e-06	0.0138293	6.1238e-06	0.00175564	5.54223
rs61956274	-11.9135	0.103668	2.3965	9.25089e-06	0.0319296	NA	NA	16.747
rs137938953	-16.9268	0.103679	1.0879	2.78138e-06	0.0161337	6.47988e-06	0.00182426	6.03894
rs189345325	7.5975	0.103899	1.28528	3.39244e-06	0.0810012	NA	NA	14.4694
rs75067820	-16.9064	0.103922	1.1141	2.31282e-06	0.0158506	6.46835e-06	0.00159655	6.18241
rs150043005	-16.8505	0.104438	1.22468	2.39431e-06	0.0179033	6.11749e-06	0.00155302	6.77547
rs192779211	-16.865	0.104702	1.02883	2.56331e-06	0.0144959	6.06729e-06	0.00178036	5.7496
rs185781921	-16.8633	0.104812	0.99463	2.45737e-06	0.0127218	6.39207e-06	0.00154987	5.5697
rs139634219	-16.8588	0.105012	1.02345	2.65513e-06	0.014341	5.82873e-06	0.00183885	5.72327
rs151188154	-16.8125	0.10561	0.99725	2.91319e-06	0.0175505	5.69546e-06	0.00261613	5.59946
rs140812674	-16.7495	0.10585	1.11586	1.89746e-06	0.0139987	5.72847e-06	0.00131536	6.24592
rs80185227	-16.7259	0.106006	1.04134	2.38188e-06	0.0160846	6.32474e-06	0.00187401	5.86103
rs147172117	-16.7174	0.106386	1.02574	2.4199e-06	0.0160005	6.42071e-06	0.00191785	5.78104
rs76563030	-16.7759	0.106664	1.16356	2.19009e-06	0.0213693	6.30616e-06	0.00211271	6.48603
rs186141507	-16.75	0.106751	1.14735	2.27716e-06	0.0183311	6.46256e-06	0.00178173	6.41073
rs138881320	-16.7833	0.106787	1.01259	2.69162e-06	0.0156461	6.6688e-06	0.00197507	5.69002
rs79286480	-16.7501	0.107049	0.875522	2.69643e-06	0.0151062	7.39342e-06	0.0023207	4.96731
rs190672052	-16.7501	0.107049	0.875522	2.69643e-06	0.0151062	7.39342e-06	0.0023207	4.96731
rs77181098	-16.7701	0.107074	1.10374	2.27837e-06	0.0182475	6.44492e-06	0.00193627	6.17519
rs865866266.COSV63596753	-16.7058	0.107266	0.931271	2.5029e-06	0.0124624	5.99799e-06	0.00176983	5.2802
rs117574481	-16.7329	0.107329	1.11339	2.79679e-06	0.0184168	6.09725e-06	0.00214329	6.2388
rs55691845	-16.7329	0.107603	1.03158	3.0467e-06	0.0185356	6.59253e-06	0.00248775	5.80695
rs75535700	-16.705	0.107773	1.0586	2.36864e-06	0.0164807	6.29269e-06	0.00188569	5.95938
rs147531075	-16.6838	0.107809	0.994639	2.35077e-06	0.0163243	5.96686e-06	0.00214806	5.62629
rs61422983	-16.7051	0.107932	1.01257	2.31639e-06	0.0179509	6.42477e-06	0.00226088	5.71501
rs140644633	-16.7014	0.108089	1.07171	2.33393e-06	0.017089	6.2684e-06	0.00192264	6.02994
rs117005966	-16.6842	0.108125	0.471228	2.32243e-06	0.0099844	6.09578e-06	0.00310236	2.74682
rs78779956	-16.7418	0.108166	1.07443	1.85754e-06	0.018237	6.54553e-06	0.00189039	6.03059
rs190093515	-16.6457	0.108339	0.966147	2.3338e-06	0.0226912	6.27782e-06	0.00336501	5.48577
rs141906400	-16.6904	0.108406	1.08929	2.34811e-06	0.0167714	6.21497e-06	0.0018252	6.12656
rs117876812	-16.6904	0.108406	1.08929	2.34811e-06	0.0167714	6.21497e-06	0.0018252	6.12656
rs149299681	-16.6912	0.108439	1.09668	2.35159e-06	0.0166256	6.12927e-06	0.00179079	6.16531
rs11576002	-16.6766	0.108541	1.10956	2.40901e-06	0.0191506	6.43785e-06	0.00207319	6.23836
rs75827462	-16.6844	0.108595	1.06282	2.29123e-06	0.0167875	6.17552e-06	0.00191263	5.98868
rs77880877	-16.6568	0.108616	1.16113	2.80258e-06	0.018212	6.2674e-06	0.00188041	6.51664
rs74469315	-16.678	0.108668	1.05251	2.36264e-06	0.0161099	6.21492e-06	0.00186553	5.93612
rs186310727	-16.6654	0.108729	0.988628	2.39284e-06	0.016073	6.38682e-06	0.00208138	5.60003
rs184326825	-16.6562	0.108788	0.987086	2.42658e-06	0.0140354	6.45787e-06	0.0017583	5.5947
rs143972585	-16.691	0.108792	1.07695	2.31442e-06	0.0179703	6.34831e-06	0.00202278	6.06117
rs144036672	-16.6977	0.108804	1.04423	2.28255e-06	0.0163332	6.12665e-06	0.00192977	5.88566
rs150966442	-16.6679	0.108972	1.05042	2.3055e-06	0.0164009	6.13284e-06	0.00191156	5.92844
rs117771000	-16.6694	0.109007	1.0286	2.37401e-06	0.0169506	6.39716e-06	0.00206405	5.81195
rs144317872	-8.33049	0.10904	0.512307	2.40993e-06	0.0156233	6.36067e-06	0.00188667	5.7935
rs117483918	-16.6536	0.109066	1.0213	2.3492e-06	0.0178113	6.3388e-06	0.00222769	5.77827
rs138583848	-16.65	0.109243	1.04142	2.34601e-06	0.017603	6.32565e-06	0.00211409	5.88656
rs147866708	-16.6536	0.109354	1.04613	2.40413e-06	0.0153659	6.21603e-06	0.00179224	5.91043
rs145539545	-16.6555	0.109359	0.952757	2.62908e-06	0.0170746	6.33895e-06	0.00251085	5.41085
rs148734707	-16.6636	0.109407	1.05664	2.89957e-06	0.0156346	4.90158e-06	0.00217079	5.96293
rs80071398	-16.6459	0.109408	1.04837	2.41085e-06	0.0164833	6.40306e-06	0.00192692	5.92489
rs148681403	-16.6601	0.10944	1.03058	2.29482e-06	0.0172661	6.04741e-06	0.00213966	5.82558
rs186915205	-16.6406	0.109455	1.0527	2.39224e-06	0.0165237	6.34831e-06	0.00191532	5.9497
rs141397086	-16.6374	0.109505	1.01168	2.38987e-06	0.0157947	6.33079e-06	0.00195732	5.73218
rs185644300	-16.6384	0.109535	1.02985	2.38175e-06	0.0161666	6.32095e-06	0.00194724	5.82881
rs117503332.COSV60212053	-16.6337	0.109551	1.03733	2.37145e-06	0.0175764	6.30897e-06	0.0021369	5.87024
rs148857836	-16.6357	0.109583	1.0788	2.45337e-06	0.0170676	6.49541e-06	0.00189457	6.08991
rs144818111	-16.6365	0.109625	1.05989	2.41177e-06	0.0175714	6.38291e-06	0.00205192	5.98931
rs148417898	-16.6483	0.109639	1.00233	2.43182e-06	0.0159688	6.49662e-06	0.00201793	5.67874
rs78594119	-16.65	0.109692	1.03756	2.42815e-06	0.0165224	6.33663e-06	0.00199496	5.86601
rs117026171	-16.6238	0.109698	1.00649	2.3847e-06	0.0164728	6.32824e-06	0.00208402	5.70888
rs142431868	-16.6327	0.109701	1.01218	2.36316e-06	0.0163961	6.35254e-06	0.00204143	5.73639
rs141985240	-16.6321	0.109703	1.0269	2.35418e-06	0.0169745	6.30962e-06	0.00208036	5.81521
rs191689936	-16.6362	0.109736	0.97754	2.46756e-06	0.0162274	6.54968e-06	0.00215848	5.54986
rs117426093	-16.6311	0.109739	1.02297	2.3875e-06	0.0157885	6.28947e-06	0.00192126	5.79451
rs9552960	-16.6422	0.109743	1.03859	2.35537e-06	0.0168266	6.46562e-06	0.00199674	5.8741
rs181142071.COSV64861078.COSV64862661	-16.6214	0.10976	1.01444	2.3557e-06	0.0158667	6.25172e-06	0.00195694	5.75214
rs4292924	-16.6214	0.10976	1.01444	2.3557e-06	0.0158667	6.25172e-06	0.00195694	5.75214
rs77317573	-16.6214	0.10976	1.01444	2.3557e-06	0.0158667	6.25172e-06	0.00195694	5.75214
rs200567044	-16.6214	0.10976	1.01444	2.3557e-06	0.0158667	6.25172e-06	0.00195694	5.75214
rs142598707	-16.6214	0.10976	1.01444	2.3557e-06	0.0158667	6.25172e-06	0.00195694	5.75214
rs201041009	-16.6214	0.10976	1.01444	2.3557e-06	0.0158667	6.25172e-06	0.00195694	5.75214
rs201172117	-16.6214	0.10976	1.01444	2.3557e-06	0.0158667	6.25172e-06	0.00195694	5.75214
rs190431418	-16.6214	0.10976	1.01444	2.3557e-06	0.0158667	6.25172e-06	0.00195694	5.75214
rs77827945	-16.6214	0.10976	1.01444	2.3557e-06	0.0158667	6.25172e-06	0.00195694	5.75214
rs144503839	-16.6214	0.10976	1.01444	2.3557e-06	0.0158667	6.25172e-06	0.00195694	5.75214
rs77599424	-16.6214	0.10976	1.01444	2.3557e-06	0.0158667	6.25172e-06	0.00195694	5.75214
rs201729184	-16.6214	0.10976	1.01444	2.3557e-06	0.0158667	6.25172e-06	0.00195694	5.75214
rs79007764	-16.6214	0.10976	1.01444	2.3557e-06	0.0158667	6.25172e-06	0.00195694	5.75214
rs182566496.COSV63121351	-16.6214	0.10976	1.01444	2.3557e-06	0.0158667	6.25172e-06	0.00195694	5.75214
rs74953085.COSV99609448	-16.6214	0.10976	1.01444	2.3557e-06	0.0158667	6.25172e-06	0.00195694	5.75214
rs143595907.COSV60739243	-16.6214	0.10976	1.01444	2.3557e-06	0.0158667	6.25172e-06	0.00195694	5.75214
rs144676974.COSV52969184	-16.6214	0.10976	1.01444	2.3557e-06	0.0158667	6.25172e-06	0.00195694	5.75214
rs118167062	-16.6214	0.10976	1.01444	2.3557e-06	0.0158667	6.25172e-06	0.00195694	5.75214
rs148899322	-16.6214	0.10976	1.01444	2.3557e-06	0.0158667	6.25172e-06	0.00195694	5.75214
rs75112076	-16.6214	0.10976	1.01444	2.3557e-06	0.0158667	6.25172e-06	0.00195694	5.75214
rs117413433	-16.6214	0.10976	1.01444	2.3557e-06	0.0158667	6.25172e-06	0.00195694	5.75214
rs182564806	-16.6214	0.10976	1.01444	2.3557e-06	0.0158667	6.25172e-06	0.00195694	5.75214
rs79237112	-16.6214	0.10976	1.01444	2.3557e-06	0.0158667	6.25172e-06	0.00195694	5.75214
rs117085377	-16.6214	0.10976	1.01444	2.3557e-06	0.0158667	6.25172e-06	0.00195694	5.75214
rs74333008	-16.6214	0.10976	1.01444	2.3557e-06	0.0158667	6.25172e-06	0.00195694	5.75214
rs118128212	-16.6214	0.10976	1.01444	2.3557e-06	0.0158667	6.25172e-06	0.00195694	5.75214
rs140547244	-16.6214	0.10976	1.01444	2.3557e-06	0.0158667	6.25172e-06	0.00195694	5.75214
rs141553115	-16.6214	0.10976	1.01444	2.3557e-06	0.0158667	6.25172e-06	0.00195694	5.75214
rs373883681	-16.6214	0.10976	1.01444	2.3557e-06	0.0158667	6.25172e-06	0.00195694	5.75214
rs183686803	-16.6214	0.10976	1.01444	2.3557e-06	0.0158667	6.25172e-06	0.00195694	5.75214
rs75334178	-16.6214	0.10976	1.01444	2.3557e-06	0.0158667	6.25172e-06	0.00195694	5.75214
rs146138781	-16.6214	0.10976	1.01444	2.3557e-06	0.0158667	6.25172e-06	0.00195694	5.75214
rs182745218	-16.6214	0.10976	1.01444	2.3557e-06	0.0158667	6.25172e-06	0.00195694	5.75214
rs183961685	-16.6214	0.10976	1.01444	2.3557e-06	0.0158667	6.25172e-06	0.00195694	5.75214
rs117665794	-16.6214	0.10976	1.01444	2.3557e-06	0.0158667	6.25172e-06	0.00195694	5.75214
rs12616529	-16.6214	0.10976	1.01444	2.3557e-06	0.0158667	6.25172e-06	0.00195694	5.75214
rs145285676	-16.6214	0.10976	1.01444	2.3557e-06	0.0158667	6.25172e-06	0.00195694	5.75214
rs76455076.COSV71375001	-16.6214	0.10976	1.01444	2.3557e-06	0.0158667	6.25172e-06	0.00195694	5.75214
rs199998986.COSV57492773	-16.6214	0.10976	1.01444	2.3557e-06	0.0158667	6.25172e-06	0.00195694	5.75214
rs75460542	-16.6214	0.10976	1.01444	2.3557e-06	0.0158667	6.25172e-06	0.00195694	5.75214
rs141981259	-16.6214	0.10976	1.01444	2.3557e-06	0.0158667	6.25172e-06	0.00195694	5.75214
rs79396968	-16.6214	0.10976	1.01444	2.3557e-06	0.0158667	6.25172e-06	0.00195694	5.75214
rs138029084	-16.6214	0.10976	1.01444	2.3557e-06	0.0158667	6.25172e-06	0.00195694	5.75214
rs145942849	-16.6214	0.10976	1.01444	2.3557e-06	0.0158667	6.25172e-06	0.00195694	5.75214
rs140048660	-16.6214	0.10976	1.01444	2.3557e-06	0.0158667	6.25172e-06	0.00195694	5.75214
rs78769695	-16.6214	0.10976	1.01444	2.3557e-06	0.0158667	6.25172e-06	0.00195694	5.75214
rs74323520	-16.6214	0.10976	1.01444	2.3557e-06	0.0158667	6.25172e-06	0.00195694	5.75214
rs77410040	-16.6214	0.10976	1.01444	2.3557e-06	0.0158667	6.25172e-06	0.00195694	5.75214
rs77776626	-16.6214	0.10976	1.01444	2.3557e-06	0.0158667	6.25172e-06	0.00195694	5.75214
rs55944080.COSV51420832	-16.6214	0.10976	1.01444	2.3557e-06	0.0158667	6.25172e-06	0.00195694	5.75214
rs147394705	-16.6214	0.10976	1.01444	2.3557e-06	0.0158667	6.25172e-06	0.00195694	5.75214
rs151269764	-16.6214	0.10976	1.01444	2.3557e-06	0.0158667	6.25172e-06	0.00195694	5.75214
rs201448153.COSV59509600.COSV59509654	-16.6214	0.10976	1.01444	2.3557e-06	0.0158667	6.25172e-06	0.00195694	5.75214
rs147928934	-16.6214	0.10976	1.01444	2.3557e-06	0.0158667	6.25172e-06	0.00195694	5.75214
rs146637751	-16.6214	0.10976	1.01444	2.3557e-06	0.0158667	6.25172e-06	0.00195694	5.75214
rs143727777	-16.6214	0.10976	1.01444	2.3557e-06	0.0158667	6.25172e-06	0.00195694	5.75214
rs80090047	-16.6214	0.10976	1.01444	2.3557e-06	0.0158667	6.25172e-06	0.00195694	5.75214
rs149935322	-16.6214	0.10976	1.01444	2.3557e-06	0.0158667	6.25172e-06	0.00195694	5.75214
rs76323370	-16.6214	0.10976	1.01444	2.3557e-06	0.0158667	6.25172e-06	0.00195694	5.75214
rs201455234	-16.6214	0.10976	1.01444	2.3557e-06	0.0158667	6.25172e-06	0.00195694	5.75214
rs192130640	-16.6214	0.10976	1.01444	2.3557e-06	0.0158667	6.25172e-06	0.00195694	5.75214
rs77068413	-16.6214	0.10976	1.01444	2.3557e-06	0.0158667	6.25172e-06	0.00195694	5.75214
rs76983277	-16.6214	0.10976	1.01444	2.3557e-06	0.0158667	6.25172e-06	0.00195694	5.75214
rs140374255	-16.6214	0.10976	1.01444	2.3557e-06	0.0158667	6.25172e-06	0.00195694	5.75214
rs79012420	-16.6214	0.10976	1.01444	2.3557e-06	0.0158667	6.25172e-06	0.00195694	5.75214
rs144738175	-16.6214	0.10976	1.01444	2.3557e-06	0.0158667	6.25172e-06	0.00195694	5.75214
rs142272086	-16.6214	0.10976	1.01444	2.3557e-06	0.0158667	6.25172e-06	0.00195694	5.75214
rs77247585	-16.6214	0.10976	1.01444	2.3557e-06	0.0158667	6.25172e-06	0.00195694	5.75214
rs200773812.COSV55788901	-16.6214	0.10976	1.01444	2.3557e-06	0.0158667	6.25172e-06	0.00195694	5.75214
rs144418856	-16.6214	0.10976	1.01444	2.3557e-06	0.0158667	6.25172e-06	0.00195694	5.75214
rs143766660	-16.6214	0.10976	1.01444	2.3557e-06	0.0158667	6.25172e-06	0.00195694	5.75214
rs149138836	-16.6214	0.10976	1.01444	2.3557e-06	0.0158667	6.25172e-06	0.00195694	5.75214
rs150102589	-16.6214	0.10976	1.01444	2.3557e-06	0.0158667	6.25172e-06	0.00195694	5.75214
rs77295369	-16.6214	0.10976	1.01444	2.3557e-06	0.0158667	6.25172e-06	0.00195694	5.75214
rs139345209	-16.6214	0.10976	1.01444	2.3557e-06	0.0158667	6.25172e-06	0.00195694	5.75214
rs140133635	-16.6214	0.10976	1.01444	2.3557e-06	0.0158667	6.25172e-06	0.00195694	5.75214
rs74758811	-16.6214	0.10976	1.01444	2.3557e-06	0.0158667	6.25172e-06	0.00195694	5.75214
rs188215829	-16.6214	0.10976	1.01444	2.3557e-06	0.0158667	6.25172e-06	0.00195694	5.75214
Variant13197	-16.6214	0.10976	1.01444	2.3557e-06	0.0158667	6.25172e-06	0.00195694	5.75214
rs141590348	-16.6214	0.10976	1.01444	2.3557e-06	0.0158667	6.25172e-06	0.00195694	5.75214
rs150126545	-16.6214	0.10976	1.01444	2.3557e-06	0.0158667	6.25172e-06	0.00195694	5.75214
rs145282515	-16.6214	0.10976	1.01444	2.3557e-06	0.0158667	6.25172e-06	0.00195694	5.75214
rs190167587	-16.6214	0.10976	1.01444	2.3557e-06	0.0158667	6.25172e-06	0.00195694	5.75214
rs143811334	-16.6214	0.10976	1.01444	2.3557e-06	0.0158667	6.25172e-06	0.00195694	5.75214
rs118181921	-16.6214	0.10976	1.01444	2.3557e-06	0.0158667	6.25172e-06	0.00195694	5.75214
rs145940614	-16.6214	0.10976	1.01444	2.3557e-06	0.0158667	6.25172e-06	0.00195694	5.75214
rs146195485	-16.6214	0.10976	1.01444	2.3557e-06	0.0158667	6.25172e-06	0.00195694	5.75214
rs117103332	-16.6214	0.10976	1.01444	2.3557e-06	0.0158667	6.25172e-06	0.00195694	5.75214
rs188760100	-16.6214	0.10976	1.01444	2.3557e-06	0.0158667	6.25172e-06	0.00195694	5.75214
rs140894340	-16.6214	0.10976	1.01444	2.3557e-06	0.0158667	6.25172e-06	0.00195694	5.75214
rs117105033	-16.6214	0.10976	1.01444	2.3557e-06	0.0158667	6.25172e-06	0.00195694	5.75214
rs78577254	-16.6214	0.10976	1.01444	2.3557e-06	0.0158667	6.25172e-06	0.00195694	5.75214
rs181047361	-16.6214	0.10976	1.01444	2.3557e-06	0.0158667	6.25172e-06	0.00195694	5.75214
rs756274300	-16.6214	0.10976	1.01444	2.3557e-06	0.0158667	6.25172e-06	0.00195694	5.75214
rs138294595	-16.6214	0.10976	1.01444	2.3557e-06	0.0158667	6.25172e-06	0.00195694	5.75214
rs80017634	-16.6214	0.10976	1.01444	2.3557e-06	0.0158667	6.25172e-06	0.00195694	5.75214
rs117530837	-16.6214	0.10976	1.01444	2.3557e-06	0.0158667	6.25172e-06	0.00195694	5.75214
rs148624022	-16.6214	0.10976	1.01444	2.3557e-06	0.0158667	6.25172e-06	0.00195694	5.75214
rs144570135	-16.6214	0.10976	1.01444	2.3557e-06	0.0158667	6.25172e-06	0.00195694	5.75214
rs76125754	-16.6214	0.10976	1.01444	2.3557e-06	0.0158667	6.25172e-06	0.00195694	5.75214
rs185649024	-16.6214	0.10976	1.01444	2.3557e-06	0.0158667	6.25172e-06	0.00195694	5.75214
rs150765053	-16.6214	0.10976	1.01444	2.3557e-06	0.0158667	6.25172e-06	0.00195694	5.75214
rs189426448	-16.6214	0.10976	1.01444	2.3557e-06	0.0158667	6.25172e-06	0.00195694	5.75214
rs147128577	-16.6214	0.10976	1.01444	2.3557e-06	0.0158667	6.25172e-06	0.00195694	5.75214
rs180778692	-16.6214	0.10976	1.01444	2.3557e-06	0.0158667	6.25172e-06	0.00195694	5.75214
rs74551351	-16.6214	0.10976	1.01444	2.3557e-06	0.0158667	6.25172e-06	0.00195694	5.75214
rs149727107	-16.6214	0.10976	1.01444	2.3557e-06	0.0158667	6.25172e-06	0.00195694	5.75214
rs118143777	-16.6214	0.10976	1.01444	2.3557e-06	0.0158667	6.25172e-06	0.00195694	5.75214
rs75137689	-16.6214	0.10976	1.01444	2.3557e-06	0.0158667	6.25172e-06	0.00195694	5.75214
rs149979103	-16.6214	0.10976	1.01444	2.3557e-06	0.0158667	6.25172e-06	0.00195694	5.75214
rs117277536	-16.6214	0.10976	1.01444	2.3557e-06	0.0158667	6.25172e-06	0.00195694	5.75214
rs117260329	-16.6214	0.10976	1.01444	2.3557e-06	0.0158667	6.25172e-06	0.00195694	5.75214
rs142274336	-16.6214	0.10976	1.01444	2.3557e-06	0.0158667	6.25172e-06	0.00195694	5.75214
rs143487881	-16.6214	0.10976	1.01444	2.3557e-06	0.0158667	6.25172e-06	0.00195694	5.75214
rs140363477.COSV100236629	-16.6214	0.10976	1.01444	2.3557e-06	0.0158667	6.25172e-06	0.00195694	5.75214
rs74854406	-16.6214	0.10976	1.01444	2.3557e-06	0.0158667	6.25172e-06	0.00195694	5.75214
rs117375884	-16.6214	0.10976	1.01444	2.3557e-06	0.0158667	6.25172e-06	0.00195694	5.75214
rs149508674	-16.6214	0.10976	1.01444	2.3557e-06	0.0158667	6.25172e-06	0.00195694	5.75214
rs151209421	-16.6214	0.10976	1.01444	2.3557e-06	0.0158667	6.25172e-06	0.00195694	5.75214
rs146453380	-16.6214	0.10976	1.01444	2.3557e-06	0.0158667	6.25172e-06	0.00195694	5.75214
rs78744268	-16.6214	0.10976	1.01444	2.3557e-06	0.0158667	6.25172e-06	0.00195694	5.75214
rs185957068	-16.6214	0.10976	1.01444	2.3557e-06	0.0158667	6.25172e-06	0.00195694	5.75214
rs117079685.COSV55929558	-16.6214	0.10976	1.01444	2.3557e-06	0.0158667	6.25172e-06	0.00195694	5.75214
rs145142382	-16.6214	0.10976	1.01444	2.3557e-06	0.0158667	6.25172e-06	0.00195694	5.75214
rs180815385	-16.6214	0.10976	1.01444	2.3557e-06	0.0158667	6.25172e-06	0.00195694	5.75214
rs148896862	-16.6214	0.10976	1.01444	2.3557e-06	0.0158667	6.25172e-06	0.00195694	5.75214
rs139842311	-16.6214	0.10976	1.01444	2.3557e-06	0.0158667	6.25172e-06	0.00195694	5.75214
rs75765505	-16.6214	0.10976	1.01444	2.3557e-06	0.0158667	6.25172e-06	0.00195694	5.75214
rs191798259	-16.6214	0.10976	1.01444	2.3557e-06	0.0158667	6.25172e-06	0.00195694	5.75214
rs118153056	-16.6214	0.10976	1.01444	2.3557e-06	0.0158667	6.25172e-06	0.00195694	5.75214
rs147615414	-16.6214	0.10976	1.01444	2.3557e-06	0.0158667	6.25172e-06	0.00195694	5.75214
rs149651310	-16.6214	0.10976	1.01444	2.3557e-06	0.0158667	6.25172e-06	0.00195694	5.75214
rs141307320	-16.6214	0.10976	1.01444	2.3557e-06	0.0158667	6.25172e-06	0.00195694	5.75214
rs117799556	-16.6214	0.10976	1.01444	2.3557e-06	0.0158667	6.25172e-06	0.00195694	5.75214
rs150315968	-16.6214	0.10976	1.01444	2.3557e-06	0.0158667	6.25172e-06	0.00195694	5.75214
rs138441090	-16.6214	0.10976	1.01444	2.3557e-06	0.0158667	6.25172e-06	0.00195694	5.75214
rs151109103	-16.6214	0.10976	1.01444	2.3557e-06	0.0158667	6.25172e-06	0.00195694	5.75214
rs75370842	-16.6214	0.10976	1.01444	2.3557e-06	0.0158667	6.25172e-06	0.00195694	5.75214
rs148227650	-16.6214	0.10976	1.01444	2.3557e-06	0.0158667	6.25172e-06	0.00195694	5.75214
rs139712737	-16.6214	0.10976	1.01444	2.3557e-06	0.0158667	6.25172e-06	0.00195694	5.75214
rs150642862	-16.6214	0.10976	1.01444	2.3557e-06	0.0158667	6.25172e-06	0.00195694	5.75214
rs77779332	-16.6214	0.10976	1.01444	2.3557e-06	0.0158667	6.25172e-06	0.00195694	5.75214
rs144469428	-16.6214	0.10976	1.01444	2.3557e-06	0.0158667	6.25172e-06	0.00195694	5.75214
rs11140726	-16.6214	0.10976	1.01444	2.3557e-06	0.0158667	6.25172e-06	0.00195694	5.75214
rs147137710	-16.6214	0.10976	1.01444	2.3557e-06	0.0158667	6.25172e-06	0.00195694	5.75214
rs117425040	-16.6214	0.10976	1.01444	2.3557e-06	0.0158667	6.25172e-06	0.00195694	5.75214
rs142477634	-16.6214	0.10976	1.01444	2.3557e-06	0.0158667	6.25172e-06	0.00195694	5.75214
rs144783598	-16.6214	0.10976	1.01444	2.3557e-06	0.0158667	6.25172e-06	0.00195694	5.75214
rs190411748	-16.6214	0.10976	1.01444	2.3557e-06	0.0158667	6.25172e-06	0.00195694	5.75214
rs79248107	-16.6214	0.10976	1.01444	2.3557e-06	0.0158667	6.25172e-06	0.00195694	5.75214
rs143950062	-16.6214	0.10976	1.01444	2.3557e-06	0.0158667	6.25172e-06	0.00195694	5.75214
rs76987497	-16.6214	0.10976	1.01444	2.3557e-06	0.0158667	6.25172e-06	0.00195694	5.75214
rs118011773	-16.6214	0.10976	1.01444	2.3557e-06	0.0158667	6.25172e-06	0.00195694	5.75214
rs144160411	-16.6214	0.10976	1.01444	2.3557e-06	0.0158667	6.25172e-06	0.00195694	5.75214
rs116922701	-16.6214	0.10976	1.01444	2.3557e-06	0.0158667	6.25172e-06	0.00195694	5.75214
rs56220353.CM045738.COSV64986786	-16.6214	0.10976	1.01444	2.3557e-06	0.0158667	6.25172e-06	0.00195694	5.75214
rs56220353.CM045738.COSV64986786.1	-16.6214	0.10976	1.01444	2.3557e-06	0.0158667	6.25172e-06	0.00195694	5.75214
rs150444603	-16.6214	0.10976	1.01444	2.3557e-06	0.0158667	6.25172e-06	0.00195694	5.75214
rs142798585	-16.6214	0.10976	1.01444	2.3557e-06	0.0158667	6.25172e-06	0.00195694	5.75214
rs143952224	-16.6214	0.10976	1.01444	2.3557e-06	0.0158667	6.25172e-06	0.00195694	5.75214
rs137867894	-16.6214	0.10976	1.01444	2.3557e-06	0.0158667	6.25172e-06	0.00195694	5.75214
rs77046859	-16.6214	0.10976	1.01444	2.3557e-06	0.0158667	6.25172e-06	0.00195694	5.75214
rs146728148	-16.6214	0.10976	1.01444	2.3557e-06	0.0158667	6.25172e-06	0.00195694	5.75214
rs142137211	-16.6214	0.10976	1.01444	2.3557e-06	0.0158667	6.25172e-06	0.00195694	5.75214
rs151136181	-16.6214	0.10976	1.01444	2.3557e-06	0.0158667	6.25172e-06	0.00195694	5.75214
rs7130798	-16.6214	0.10976	1.01444	2.3557e-06	0.0158667	6.25172e-06	0.00195694	5.75214
rs77991263	-16.6214	0.10976	1.01444	2.3557e-06	0.0158667	6.25172e-06	0.00195694	5.75214
rs146219330	-16.6214	0.10976	1.01444	2.3557e-06	0.0158667	6.25172e-06	0.00195694	5.75214
rs117186901	-16.6214	0.10976	1.01444	2.3557e-06	0.0158667	6.25172e-06	0.00195694	5.75214
rs149502247	-16.6214	0.10976	1.01444	2.3557e-06	0.0158667	6.25172e-06	0.00195694	5.75214
rs192998156	-16.6214	0.10976	1.01444	2.3557e-06	0.0158667	6.25172e-06	0.00195694	5.75214
rs187343931	-16.6214	0.10976	1.01444	2.3557e-06	0.0158667	6.25172e-06	0.00195694	5.75214
rs192586242.COSV100265713	-16.6214	0.10976	1.01444	2.3557e-06	0.0158667	6.25172e-06	0.00195694	5.75214
rs144093062	-16.6214	0.10976	1.01444	2.3557e-06	0.0158667	6.25172e-06	0.00195694	5.75214
rs144723667	-16.6214	0.10976	1.01444	2.3557e-06	0.0158667	6.25172e-06	0.00195694	5.75214
rs117997280	-16.6214	0.10976	1.01444	2.3557e-06	0.0158667	6.25172e-06	0.00195694	5.75214
rs147509777	-16.6214	0.10976	1.01444	2.3557e-06	0.0158667	6.25172e-06	0.00195694	5.75214
rs11568551	-16.6214	0.10976	1.01444	2.3557e-06	0.0158667	6.25172e-06	0.00195694	5.75214
rs148233198	-16.6214	0.10976	1.01444	2.3557e-06	0.0158667	6.25172e-06	0.00195694	5.75214
rs74979900	-16.6214	0.10976	1.01444	2.3557e-06	0.0158667	6.25172e-06	0.00195694	5.75214
rs142816804	-16.6214	0.10976	1.01444	2.3557e-06	0.0158667	6.25172e-06	0.00195694	5.75214
rs149349524	-16.6214	0.10976	1.01444	2.3557e-06	0.0158667	6.25172e-06	0.00195694	5.75214
rs17483502	-16.6214	0.10976	1.01444	2.3557e-06	0.0158667	6.25172e-06	0.00195694	5.75214
rs187666598	-16.6214	0.10976	1.01444	2.3557e-06	0.0158667	6.25172e-06	0.00195694	5.75214
rs151314243	-16.6214	0.10976	1.01444	2.3557e-06	0.0158667	6.25172e-06	0.00195694	5.75214
rs180744618	-16.6214	0.10976	1.01444	2.3557e-06	0.0158667	6.25172e-06	0.00195694	5.75214
rs78928914	-16.6214	0.10976	1.01444	2.3557e-06	0.0158667	6.25172e-06	0.00195694	5.75214
rs145719745	-16.6214	0.10976	1.01444	2.3557e-06	0.0158667	6.25172e-06	0.00195694	5.75214
rs138522332	-16.6214	0.10976	1.01444	2.3557e-06	0.0158667	6.25172e-06	0.00195694	5.75214
rs140372565.COSV57965275	-16.6214	0.10976	1.01444	2.3557e-06	0.0158667	6.25172e-06	0.00195694	5.75214
rs75308431.COSV59240455	-16.6214	0.10976	1.01444	2.3557e-06	0.0158667	6.25172e-06	0.00195694	5.75214
rs75308431.COSV59240455.1	-16.6214	0.10976	1.01444	2.3557e-06	0.0158667	6.25172e-06	0.00195694	5.75214
rs113125615.CM1618189.COSV57510955	-16.6214	0.10976	1.01444	2.3557e-06	0.0158667	6.25172e-06	0.00195694	5.75214
rs151149985	-16.6214	0.10976	1.01444	2.3557e-06	0.0158667	6.25172e-06	0.00195694	5.75214
rs187801483	-16.6214	0.10976	1.01444	2.3557e-06	0.0158667	6.25172e-06	0.00195694	5.75214
rs139236309	-16.6214	0.10976	1.01444	2.3557e-06	0.0158667	6.25172e-06	0.00195694	5.75214
rs150455908	-16.6214	0.10976	1.01444	2.3557e-06	0.0158667	6.25172e-06	0.00195694	5.75214
rs78821196	-16.6214	0.10976	1.01444	2.3557e-06	0.0158667	6.25172e-06	0.00195694	5.75214
rs138251806	-16.6214	0.10976	1.01444	2.3557e-06	0.0158667	6.25172e-06	0.00195694	5.75214
rs75783783	-16.6214	0.10976	1.01444	2.3557e-06	0.0158667	6.25172e-06	0.00195694	5.75214
rs147223470	-16.6214	0.10976	1.01444	2.3557e-06	0.0158667	6.25172e-06	0.00195694	5.75214
rs1345092	-16.6214	0.10976	1.01444	2.3557e-06	0.0158667	6.25172e-06	0.00195694	5.75214
rs150217370	-16.6214	0.10976	1.01444	2.3557e-06	0.0158667	6.25172e-06	0.00195694	5.75214
rs74820648	-16.6214	0.10976	1.01444	2.3557e-06	0.0158667	6.25172e-06	0.00195694	5.75214
rs145985541	-16.6214	0.10976	1.01444	2.3557e-06	0.0158667	6.25172e-06	0.00195694	5.75214
rs149915751	-16.6214	0.10976	1.01444	2.3557e-06	0.0158667	6.25172e-06	0.00195694	5.75214
rs183328539	-16.6214	0.10976	1.01444	2.3557e-06	0.0158667	6.25172e-06	0.00195694	5.75214
rs117938586	-16.6214	0.10976	1.01444	2.3557e-06	0.0158667	6.25172e-06	0.00195694	5.75214
rs9568147	-16.6214	0.10976	1.01444	2.3557e-06	0.0158667	6.25172e-06	0.00195694	5.75214
rs149949253	-16.6214	0.10976	1.01444	2.3557e-06	0.0158667	6.25172e-06	0.00195694	5.75214
rs140358575	-16.6214	0.10976	1.01444	2.3557e-06	0.0158667	6.25172e-06	0.00195694	5.75214
rs144842247	-16.6214	0.10976	1.01444	2.3557e-06	0.0158667	6.25172e-06	0.00195694	5.75214
rs117068479	-16.6214	0.10976	1.01444	2.3557e-06	0.0158667	6.25172e-06	0.00195694	5.75214
rs191179599	-16.6214	0.10976	1.01444	2.3557e-06	0.0158667	6.25172e-06	0.00195694	5.75214
rs201686630	-16.6214	0.10976	1.01444	2.3557e-06	0.0158667	6.25172e-06	0.00195694	5.75214
rs76936836	-16.6214	0.10976	1.01444	2.3557e-06	0.0158667	6.25172e-06	0.00195694	5.75214
rs117114387	-16.6214	0.10976	1.01444	2.3557e-06	0.0158667	6.25172e-06	0.00195694	5.75214
rs138008369	-16.6214	0.10976	1.01444	2.3557e-06	0.0158667	6.25172e-06	0.00195694	5.75214
rs74576923	-16.6214	0.10976	1.01444	2.3557e-06	0.0158667	6.25172e-06	0.00195694	5.75214
rs79367070	-16.6214	0.10976	1.01444	2.3557e-06	0.0158667	6.25172e-06	0.00195694	5.75214
rs80274596	-16.6214	0.10976	1.01444	2.3557e-06	0.0158667	6.25172e-06	0.00195694	5.75214
rs184674278	-16.6214	0.10976	1.01444	2.3557e-06	0.0158667	6.25172e-06	0.00195694	5.75214
rs142952191	-16.6214	0.10976	1.01444	2.3557e-06	0.0158667	6.25172e-06	0.00195694	5.75214
rs75812946	-16.6214	0.10976	1.01444	2.3557e-06	0.0158667	6.25172e-06	0.00195694	5.75214
rs117850114	-16.6214	0.10976	1.01444	2.3557e-06	0.0158667	6.25172e-06	0.00195694	5.75214
rs79641633	-16.6214	0.10976	1.01444	2.3557e-06	0.0158667	6.25172e-06	0.00195694	5.75214
rs180939683	-16.6214	0.10976	1.01444	2.3557e-06	0.0158667	6.25172e-06	0.00195694	5.75214
rs79275026	-16.6214	0.10976	1.01444	2.3557e-06	0.0158667	6.25172e-06	0.00195694	5.75214
rs145526987	-16.6214	0.10976	1.01444	2.3557e-06	0.0158667	6.25172e-06	0.00195694	5.75214
rs116753155.COSV55012489	-16.6214	0.10976	1.01444	2.3557e-06	0.0158667	6.25172e-06	0.00195694	5.75214
rs151314215	-16.6214	0.10976	1.01444	2.3557e-06	0.0158667	6.25172e-06	0.00195694	5.75214
rs139573892	-16.6214	0.10976	1.01444	2.3557e-06	0.0158667	6.25172e-06	0.00195694	5.75214
rs200236506.COSV101237223	-16.6214	0.10976	1.01444	2.3557e-06	0.0158667	6.25172e-06	0.00195694	5.75214
rs182444420	-16.6214	0.10976	1.01444	2.3557e-06	0.0158667	6.25172e-06	0.00195694	5.75214
rs145654017	-16.6214	0.10976	1.01444	2.3557e-06	0.0158667	6.25172e-06	0.00195694	5.75214
rs186631004	-16.6214	0.10976	1.01444	2.3557e-06	0.0158667	6.25172e-06	0.00195694	5.75214
rs76067459	-16.6214	0.10976	1.01444	2.3557e-06	0.0158667	6.25172e-06	0.00195694	5.75214
rs184997830	-16.6214	0.10976	1.01444	2.3557e-06	0.0158667	6.25172e-06	0.00195694	5.75214
rs149140245	-16.6214	0.10976	1.01444	2.3557e-06	0.0158667	6.25172e-06	0.00195694	5.75214
rs138607085	-16.6214	0.10976	1.01444	2.3557e-06	0.0158667	6.25172e-06	0.00195694	5.75214
rs143784778	-16.6214	0.10976	1.01444	2.3557e-06	0.0158667	6.25172e-06	0.00195694	5.75214
rs189310554	-16.6214	0.10976	1.01444	2.3557e-06	0.0158667	6.25172e-06	0.00195694	5.75214
rs77374713	-16.6214	0.10976	1.01444	2.3557e-06	0.0158667	6.25172e-06	0.00195694	5.75214
rs117221568	-16.6214	0.10976	1.01444	2.3557e-06	0.0158667	6.25172e-06	0.00195694	5.75214
rs2303978	-16.6214	0.10976	1.01444	2.3557e-06	0.0158667	6.25172e-06	0.00195694	5.75214
rs148636563	-16.6214	0.10976	1.01444	2.3557e-06	0.0158667	6.25172e-06	0.00195694	5.75214
rs147903466	-16.6214	0.10976	1.01444	2.3557e-06	0.0158667	6.25172e-06	0.00195694	5.75214
rs79914366	-16.6214	0.10976	1.01444	2.3557e-06	0.0158667	6.25172e-06	0.00195694	5.75214
rs142909525	-16.6214	0.10976	1.01444	2.3557e-06	0.0158667	6.25172e-06	0.00195694	5.75214
rs150972124	-16.6214	0.10976	1.01444	2.3557e-06	0.0158667	6.25172e-06	0.00195694	5.75214
rs138013990	-16.6214	0.10976	1.01444	2.3557e-06	0.0158667	6.25172e-06	0.00195694	5.75214
rs2288901	-16.6214	0.10976	1.01444	2.3557e-06	0.0158667	6.25172e-06	0.00195694	5.75214
rs150155929	-16.6214	0.10976	1.01444	2.3557e-06	0.0158667	6.25172e-06	0.00195694	5.75214
rs80119825	-16.6214	0.10976	1.01444	2.3557e-06	0.0158667	6.25172e-06	0.00195694	5.75214
rs140190524	-16.6214	0.10976	1.01444	2.3557e-06	0.0158667	6.25172e-06	0.00195694	5.75214
rs184959520	-16.6214	0.10976	1.01444	2.3557e-06	0.0158667	6.25172e-06	0.00195694	5.75214
rs139585754	-16.6214	0.10976	1.01444	2.3557e-06	0.0158667	6.25172e-06	0.00195694	5.75214
rs75974495	-16.6214	0.10976	1.01444	2.3557e-06	0.0158667	6.25172e-06	0.00195694	5.75214
rs188877536	-16.6214	0.10976	1.01444	2.3557e-06	0.0158667	6.25172e-06	0.00195694	5.75214
rs78093016	-16.6214	0.10976	1.01444	2.3557e-06	0.0158667	6.25172e-06	0.00195694	5.75214
rs147762749	-16.6214	0.10976	1.01444	2.3557e-06	0.0158667	6.25172e-06	0.00195694	5.75214
rs139987367	-16.6214	0.10976	1.01444	2.3557e-06	0.0158667	6.25172e-06	0.00195694	5.75214
rs79741302	-16.6214	0.10976	1.01444	2.3557e-06	0.0158667	6.25172e-06	0.00195694	5.75214
rs188561108	-16.6214	0.10976	1.01444	2.3557e-06	0.0158667	6.25172e-06	0.00195694	5.75214
rs148921170	-16.6214	0.10976	1.01444	2.3557e-06	0.0158667	6.25172e-06	0.00195694	5.75214
rs58563114	-16.6214	0.10976	1.01444	2.3557e-06	0.0158667	6.25172e-06	0.00195694	5.75214
rs17285869	-16.6214	0.10976	1.01444	2.3557e-06	0.0158667	6.25172e-06	0.00195694	5.75214
rs188342261	-16.6214	0.10976	1.01444	2.3557e-06	0.0158667	6.25172e-06	0.00195694	5.75214
rs142208865	-16.6214	0.10976	1.01444	2.3557e-06	0.0158667	6.25172e-06	0.00195694	5.75214
rs182040920	-16.6214	0.10976	1.01444	2.3557e-06	0.0158667	6.25172e-06	0.00195694	5.75214
rs117935213	-8.31072	0.10976	0.50722	2.3557e-06	0.0158667	6.25172e-06	0.00195694	5.75214
rs181280920	-8.31072	0.10976	0.50722	2.3557e-06	0.0158667	6.25172e-06	0.00195694	5.75214
rs140522028	-8.31072	0.10976	0.50722	2.3557e-06	0.0158667	6.25172e-06	0.00195694	5.75214
rs76009440	-16.6293	0.109762	1.02107	2.37747e-06	0.0163543	6.32906e-06	0.00200799	5.78494
rs139966602	4.42296	0.109774	0.769426	2.153e-06	0.083226	NA	NA	14.8183
rs117008532	-16.6293	0.10981	1.01864	2.31207e-06	0.0161401	6.28209e-06	0.00197008	5.77198
rs137953911	-16.6202	0.109813	1.01655	2.38078e-06	0.0171178	6.30233e-06	0.00215197	5.76382
rs149234190	-16.6285	0.109815	1.01749	2.35656e-06	0.016168	6.33269e-06	0.00198563	5.76611
rs141044095	-16.6134	0.109822	1.04108	2.38333e-06	0.0235913	6.29685e-06	0.00311917	5.89696
rs200839338	-16.6248	0.109911	1.02032	2.36295e-06	0.0159233	6.06571e-06	0.00197926	5.78243
rs188669982	-8.31143	0.109925	0.499432	2.43524e-06	0.0156926	6.18834e-06	0.00203036	5.66836
rs149633810	-16.6221	0.109954	1.01488	2.36571e-06	0.0160003	6.32962e-06	0.00197228	5.75428
rs146980592	-16.624	0.109958	1.02174	2.41956e-06	0.0158017	6.32596e-06	0.00193249	5.79029
rs150282841	-16.6214	0.109969	1.01909	2.37236e-06	0.0160878	6.2775e-06	0.0019825	5.77703
rs148242667	-16.6442	0.109973	0.999882	1.71736e-06	0.0161669	5.32558e-06	0.00199048	5.66695
rs76720238	-8.31076	0.109981	0.508984	2.29006e-06	0.0162331	6.3462e-06	0.00196936	5.77096
rs143151647	-16.6201	0.109996	1.01336	2.38497e-06	0.0159016	6.34223e-06	0.00196608	5.74683
rs79045159	-16.6125	0.110003	0.994777	2.37608e-06	0.0145155	6.30647e-06	0.00181517	5.6498
rs146874325	-16.6252	0.110009	0.961314	1.9606e-06	0.0139927	5.88476e-06	0.00178205	5.4662
rs145058362	-16.6175	0.110009	1.02483	2.39584e-06	0.0163323	6.32754e-06	0.00199584	5.80894
rs145926571	-16.6175	0.110009	1.02483	2.39584e-06	0.0163323	6.32754e-06	0.00199584	5.80894
rs74815459	-16.6175	0.110009	1.02483	2.39584e-06	0.0163323	6.32754e-06	0.00199584	5.80894
rs555684936	-16.6175	0.110009	1.02483	2.39584e-06	0.0163323	6.32754e-06	0.00199584	5.80894
rs144521331	-16.6175	0.110009	1.02483	2.39584e-06	0.0163323	6.32754e-06	0.00199584	5.80894
rs148274683	-16.6175	0.110009	1.02483	2.39584e-06	0.0163323	6.32754e-06	0.00199584	5.80894
rs184867391	-16.6169	0.110044	1.01078	2.37733e-06	0.0156212	6.32653e-06	0.00193154	5.73408
rs77074472	-16.615	0.110088	1.00775	2.37159e-06	0.0155866	6.32637e-06	0.00193569	5.71845
rs192527985	-16.6117	0.110106	0.999487	2.39776e-06	0.0144886	6.41761e-06	0.00178807	5.67531
rs75249371	-16.6122	0.110112	1.06494	2.41327e-06	0.0148759	6.49363e-06	0.0016204	6.02441
rs117121599	-16.6134	0.110124	1.01246	2.37387e-06	0.0157102	6.35037e-06	0.00193476	5.74419
rs145682657	-16.613	0.110145	0.999066	2.39327e-06	0.015787	6.3465e-06	0.00200196	5.67261
rs116968396	-16.613	0.110145	0.999066	2.39327e-06	0.015787	6.3465e-06	0.00200196	5.67261
rs141195786	-16.6029	0.110213	0.999761	2.38652e-06	0.0167865	6.27248e-06	0.00217373	5.6796
rs145504401	-16.6029	0.110213	0.999761	2.38652e-06	0.0167865	6.27248e-06	0.00217373	5.6796
rs80169186	-16.6038	0.110336	0.997427	2.3814e-06	0.0159856	6.19582e-06	0.00206216	5.66679
rs11036480	-16.5999	0.110409	0.992892	2.26116e-06	0.0150041	6.30205e-06	0.00187107	5.64376
rs193223899	-16.5853	0.110419	0.980949	2.44383e-06	0.0166618	6.27176e-06	0.00225265	5.58427
rs75164447	-16.596	0.110455	0.993183	2.35632e-06	0.0152543	6.32642e-06	0.00193075	5.64655
rs138017670	-16.5917	0.110497	0.986108	2.36946e-06	0.0181651	6.03231e-06	0.00251311	5.60996
rs145636984	-16.5883	0.110523	0.984939	2.38719e-06	0.0163205	6.26284e-06	0.00215779	5.60476
rs188134673	-16.5974	0.110534	0.993577	2.13861e-06	0.0157777	6.02132e-06	0.00198777	5.64823
rs184593433	-16.614	0.110564	1.07225	2.71269e-06	0.0172818	6.09466e-06	0.00210423	6.06262
rs59735373	-16.5934	0.110616	0.975104	2.44867e-06	0.0163447	6.44457e-06	0.00219691	5.5503
rs76502135	-16.5826	0.110705	0.959646	2.35816e-06	0.0145988	6.34789e-06	0.00194278	5.47048
rs191455113	-16.5826	0.110705	0.959646	2.35816e-06	0.0145988	6.34789e-06	0.00194278	5.47048
rs80232192	-16.5679	0.110768	0.958	2.37928e-06	0.0151896	6.30785e-06	0.00206032	5.46621
rs181201567	-16.5778	0.110839	0.972694	2.38114e-06	0.0161353	6.14981e-06	0.00219421	5.54227
rs78343152	-16.5778	0.110839	0.972694	2.38114e-06	0.0161353	6.14981e-06	0.00219421	5.54227
rs76887459	-16.584	0.110848	1.00452	2.344e-06	0.0166911	6.45832e-06	0.00210295	5.71125
rs144903521	-16.5479	0.110959	0.944988	2.3877e-06	0.0173095	6.21658e-06	0.0025113	5.40212
rs75438846	-16.5479	0.110959	0.944988	2.3877e-06	0.0173095	6.21658e-06	0.0025113	5.40212
rs576801873	-16.5479	0.110959	0.944988	2.3877e-06	0.0173095	6.21658e-06	0.0025113	5.40212
rs117576669	-16.5647	0.111052	0.960317	2.29195e-06	0.013907	6.32999e-06	0.00180898	5.4797
rs74727805	-16.5683	0.111061	0.978838	2.33835e-06	0.0155355	6.18876e-06	0.00204616	5.57835
rs143273711	-16.5613	0.11107	0.9447	2.35788e-06	0.0145902	6.31376e-06	0.00200148	5.39643
rs150530277	-16.5613	0.11107	0.9447	2.35788e-06	0.0145902	6.31376e-06	0.00200148	5.39643
rs147493050.COSV50014553	-16.5833	0.111444	0.991164	2.5014e-06	0.0166173	6.57294e-06	0.00218656	5.63981
rs191353566	8.18081	0.111532	1.36846	7.59786e-06	0.0791976	NA	NA	14.3305
rs117599468	-16.5407	0.111567	1.00611	2.38106e-06	0.0158961	6.27696e-06	0.00199999	5.73384
rs11568551.1	-16.5561	0.111609	0.959339	2.2854e-06	0.0156256	5.85785e-06	0.00217767	5.4771
rs117638546	-16.5124	0.112144	0.983756	2.09205e-06	0.0168597	6.29882e-06	0.00214606	5.62269
rs184723631	-16.4965	0.112159	0.947309	2.45603e-06	0.01549	6.63035e-06	0.00213403	5.43063
rs139420309	-16.4607	0.112275	0.917337	2.31801e-06	0.01186	6.33824e-06	0.00160367	5.27871
rs147001784	-16.5231	0.112495	0.966867	2.12016e-06	0.0145264	5.90542e-06	0.00190463	5.52812
rs117929532	-8.23629	0.112514	0.403773	2.39245e-06	0.0157493	6.17237e-06	0.00288911	4.67326
rs117813880	-16.485	0.112635	1.10847	2.60667e-06	0.0164405	7.15351e-06	0.00165854	6.30047
rs146414283	-16.4958	0.112714	0.887246	2.23655e-06	0.0154918	5.18334e-06	0.00258082	5.10409
rs144309472	-16.5076	0.112814	0.914359	2.07788e-06	0.0184501	5.31067e-06	0.00297392	5.24832
rs74446112	-16.4907	0.112836	0.970998	2.39361e-06	0.0167337	5.95546e-06	0.00235028	5.56073
rs147832263	-16.4605	0.112922	0.904732	2.46644e-06	0.0175317	6.41729e-06	0.00275711	5.21001
rs79925682	-16.469	0.112975	0.86282	2.2876e-06	0.0137384	6.17305e-06	0.00216399	4.97825
rs114474404	7.44745	0.113091	-1.33797	4.58338e-07	0.095145	NA	NA	15.2294
rs190410641	-16.4847	0.113147	0.885982	2.26559e-06	0.015536	5.24441e-06	0.00259881	5.10043
rs117190498	-16.4803	0.11325	1.06137	2.79165e-06	0.0174918	5.73385e-06	0.00226349	6.05059
rs77325671	-16.4644	0.113672	0.993537	2.48459e-06	0.0143145	6.60554e-06	0.00178768	5.69103
rs144911751	-16.3932	0.113901	0.91415	2.38417e-06	0.0146904	6.29962e-06	0.00214499	5.28187
rs41299438	-16.3932	0.113901	0.91415	2.38417e-06	0.0146904	6.29962e-06	0.00214499	5.28187
rs12616529.1	-16.4354	0.113931	0.795514	2.35419e-06	0.0103031	6.41852e-06	0.00171678	4.61677
rs115759450	-5.14675	0.114684	0.456627	9.09225e-08	0.438043	NA	NA	8.14914
rs117950089	-8.27826	0.115087	1.78517	7.0377e-06	0.025737	NA	NA	17.7392
rs10984980.COSV52962906	1.58614	0.115088	-0.252453	6.61594e-06	0.100324	NA	NA	13.7307
rs142524381	-16.3606	0.115455	0.871573	2.33854e-06	0.0179131	4.82207e-06	0.00334834	5.05783
rs75717538	-16.3606	0.115455	0.871573	2.33854e-06	0.0179131	4.82207e-06	0.00334834	5.05783
rs149091338	-16.3401	0.116472	0.851223	2.47853e-06	0.0132488	6.21027e-06	0.0021959	4.95146
rs186100104	-16.2912	0.116574	0.799952	2.34086e-06	0.0169441	6.43056e-06	0.00315845	4.6805
rs76377725	-16.2825	0.11739	0.957211	2.36644e-06	0.0199108	4.98267e-06	0.0032493	5.55235
rs116054196	-16.409	0.117596	0.69076	3.30192e-06	0.0382219	8.34236e-06	0.0107953	4.03959
rs56071233.COSV59894748.COSV60371613	-16.245	0.118437	0.887691	2.2273e-06	0.016348	4.33029e-06	0.00299767	5.18128
rs73971620	-16.2413	0.118573	0.842164	2.34768e-06	0.0140702	5.03753e-06	0.00258747	4.92971
rs78550505	1.803	0.119594	0.203289	9.52777e-06	0.241858	NA	NA	10.1326
rs186502932	-16.2041	0.12009	0.528174	2.08237e-06	0.0150197	5.26231e-06	0.00464714	3.15662
rs148634388	-16.1012	0.120624	0.631981	1.94017e-06	0.00951284	5.88666e-06	0.0020442	3.77681
rs34362304	-1.27352	0.121972	-0.238941	2.52743e-06	0.075447	NA	NA	15.7982
rs139270070	3.80501	0.122656	-0.585029	1.71664e-05	0.103287	NA	NA	13.3263
rs148635749	-4.68784	0.127586	-0.63641	5.61886e-07	0.223124	NA	NA	11.953
rs34362304.1	-1.24207	0.128527	-0.262646	3.54736e-06	0.043712	NA	NA	17.4549
rs148968284	-11.1582	0.131467	-1.28857	1.12292e-05	0.241914	NA	NA	10.3526
rs1351158	-2.82378	0.131957	0.320097	4.04305e-06	0.014511	3.84902e-07	0.00184091	10.1816
rs184384228	-15.5812	0.13259	0.562327	2.1452e-06	0.0211709	4.27765e-06	0.0071861	3.48329
rs146207088	-11.1509	0.133629	-1.23693	1.09122e-05	0.264581	NA	NA	9.98506
rs79677861	-11.0974	0.135279	-1.30664	1.11179e-05	0.237384	NA	NA	10.534
rs147420971	-11.0974	0.135279	-1.30664	1.11179e-05	0.237384	NA	NA	10.534
rs117925630	-11.0974	0.135279	-1.30664	1.11179e-05	0.237384	NA	NA	10.534
rs117455202	-11.0974	0.135279	-1.30664	1.11179e-05	0.237384	NA	NA	10.534
rs141672178	-11.0974	0.135279	-1.30664	1.11179e-05	0.237384	NA	NA	10.534
rs115117038	-5.34404	0.135798	0.498142	6.66196e-08	0.445758	NA	NA	8.52664
rs148919436	-9.03271	0.142111	-1.19962	5.37992e-07	0.250029	NA	NA	11.7238
rs77661219	-9.03271	0.142111	-1.19962	5.37992e-07	0.250029	NA	NA	11.7238
rs145681254	-4.9974	0.142237	0.327418	1.41975e-06	0.556895	NA	NA	6.14891
rs61733089	5.1199	0.145206	-0.897011	3.76039e-06	0.103161	NA	NA	14.9082
rs7005777	0.861588	0.15002	-0.210775	2.86836e-06	0.0263701	NA	NA	19.6552
rs59894521	-3.61746	0.152057	-0.494849	1.21601e-07	0.273349	NA	NA	12.0334
rs76356005	-6.62485	0.15708	1.60211	5.04028e-06	0.0269322	NA	NA	19.4739
rs6079722	0.977027	0.158981	-0.173132	8.7406e-06	0.0977603	NA	NA	15.0529
rs13188025	2.86249	0.161734	0.545186	1.09732e-05	0.0737259	NA	NA	15.9988
rs150475809	-8.3033	0.170399	-1.06485	1.63548e-05	0.228581	NA	NA	11.3667
rs76566630	-1.75925	0.178264	-0.231571	1.23688e-05	0.231738	NA	NA	11.632
rs116335195	5.37478	0.178462	-0.965784	8.79481e-06	0.108422	NA	NA	15.2318
rs148433271	7.9953	0.179545	1.63472	6.01429e-06	0.073531	NA	NA	16.9753
rs17686457	-0.703462	0.180718	0.175456	7.43124e-06	0.0279727	NA	NA	19.9627
JHU_X.443544	-6.24571	0.186457	0.613833	1.23052e-07	0.467418	NA	NA	8.9486
rs11121727	2.09729	0.19469	0.300196	5.10631e-06	0.229367	NA	NA	12.5213
rs11121727.1	2.09729	0.19469	0.300196	5.10631e-06	0.229367	NA	NA	12.5213
rs28667046	-0.931224	0.195276	0.233072	1.24267e-05	0.0287205	NA	NA	20.0183
rs73063039	3.00454	0.21124	-0.580582	1.36807e-05	0.101443	NA	NA	16.1942
rs117830285	-7.56002	0.218358	-1.08165	1.12442e-05	0.236824	NA	NA	12.5167
rs146800096	-9.07854	0.222989	-1.51388	4.45918e-07	0.23394	NA	NA	14.2921
rs751917604	-9.07854	0.222989	-1.51388	4.45918e-07	0.23394	NA	NA	14.2921
rs75101611	-9.07854	0.222989	-1.51388	4.45918e-07	0.23394	NA	NA	14.2921
rs202186196	-9.07854	0.222989	-1.51388	4.45918e-07	0.23394	NA	NA	14.2921
rs142160957	-9.07854	0.222989	-1.51388	4.45918e-07	0.23394	NA	NA	14.2921
rs148784679	-9.07854	0.222989	-1.51388	4.45918e-07	0.23394	NA	NA	14.2921
rs76994284	-9.06178	0.224067	-1.53277	4.47649e-07	0.228585	NA	NA	14.4675
rs76347993	-9.00275	0.227052	-1.55892	4.45874e-07	0.22104	NA	NA	14.7601
rs144465232	-8.93116	0.229238	-1.54925	5.58309e-07	0.219025	NA	NA	14.7824
rs28583993	2.15561	0.232471	-0.473763	1.18061e-06	0.11058	NA	NA	18.0181
rs117237153	-6.15854	0.237182	-0.967419	7.4109e-06	0.221261	NA	NA	13.576
rs1452787	0.706183	0.237612	0.170625	3.13456e-06	0.0707743	NA	NA	19.4598
rs149212121	-8.34429	0.256829	0.899216	1.4404e-06	0.0134304	7.5278e-07	0.00216681	9.72808
rs12294553	2.84858	0.266545	-0.638512	3.08009e-06	0.114994	NA	NA	18.3108
rs73814310	-0.623324	0.270081	-0.167507	1.24134e-05	0.048582	NA	NA	21.1811
rs80307148	4.30465	0.27119	1.12203	3.28961e-06	0.0687759	NA	NA	20.6761
rs190073949	6.54923	0.27397	1.73736	8.61722e-07	0.0816434	NA	NA	20.9659
rs117711504	6.47739	0.279827	1.80706	8.67307e-07	0.0702447	NA	NA	21.8127
rs144113658	2.08927	0.281357	-0.616418	1.35915e-05	0.0312375	NA	NA	22.7823
rs544207972	-3.38167	0.283911	-0.0731404	2.62914e-06	0.069597	1.13862e-07	0.135875	2.11706
rs568099192	-3.38027	0.283918	-0.0730524	2.59749e-06	0.0686009	1.11922e-07	0.134372	2.11543
rs6777050	0.639976	0.284301	0.176269	1.66948e-06	0.0690572	NA	NA	21.5951
rs872241	-0.553407	0.285368	-0.0954067	1.27267e-05	0.213041	NA	NA	14.7048
rs13306653	-0.693576	0.286383	0.148304	1.60816e-05	0.118998	NA	NA	17.6158
rs5723.COSV55599716	-0.693576	0.286383	0.148304	1.60816e-05	0.118998	NA	NA	17.6158
rs5729	-0.693576	0.286383	0.148304	1.60816e-05	0.118998	NA	NA	17.6158
rs9922448	-0.693576	0.286383	0.148304	1.60816e-05	0.118998	NA	NA	17.6158
rs12424587	3.6077	0.2879	-0.788827	1.11944e-05	0.118581	NA	NA	17.942
rs7433096	0.785485	0.287904	0.204771	8.71398e-06	0.0662257	NA	NA	20.6786
rs117676762	-5.52591	0.297382	-0.882541	2.04823e-06	0.30074	NA	NA	13.7715
JHU_3.102967266	0.620625	0.297859	0.18865	1.70395e-06	0.0511866	NA	NA	23.311
rs146025181	-6.23869	0.299923	0.652701	1.26407e-06	0.508253	NA	NA	9.47125
rs79992884	-6.35477	0.302799	-1.28217	5.01735e-07	0.221327	NA	NA	16.7891
rs6546272	-0.536142	0.310347	-0.142188	1.78321e-05	0.0644362	NA	NA	20.9614
rs8052308	-1.52199	0.328198	-0.294583	8.5727e-06	0.209452	NA	NA	16.2164
rs75627650	1.51933	0.33058	-0.498825	1.0723e-05	0.0323862	NA	NA	24.7168
rs148134772	-7.19234	0.334421	-1.39619	1.02697e-05	0.210279	NA	NA	16.2565
rs149786280	-7.18397	0.334686	-1.39977	1.0477e-05	0.20813	NA	NA	16.3073
rs117059968	-7.18397	0.334686	-1.39977	1.0477e-05	0.20813	NA	NA	16.3073
rs7656250	0.567476	0.338421	0.166165	7.8053e-06	0.0643514	NA	NA	22.6494
rs72814539	-1.22305	0.340433	-0.028581	2.11001e-06	0.889601	NA	NA	2.2835
rs17134784	-1.82967	0.341853	0.210617	6.71563e-07	0.515062	NA	NA	10.3229
rs141944886	4.94581	0.344201	-1.25603	6.80564e-06	0.115364	NA	NA	20.2526
rs79250166	-2.18567	0.344221	0.33455	4.1085e-09	0.466114	NA	NA	13.2747
rs10824740.COSV57889469	-0.509164	0.344536	-0.152185	6.62583e-06	0.0643038	NA	NA	23.0113
rs114192932	3.17266	0.347433	0.928893	1.24288e-05	0.0633743	NA	NA	22.6473
rs10824740.COSV57889469.1	-0.503699	0.34981	-0.157806	6.35094e-06	0.055735	NA	NA	23.8556
rs139077812.COSV99056053	5.52428	0.352399	1.74175	2.70777e-06	0.0650958	NA	NA	23.9711
rs74742299	0.843672	0.356985	-0.230905	3.31968e-06	0.109894	NA	NA	21.488
imm_1_153369771	-0.477062	0.35937	-0.0291329	1.22682e-06	0.733078	NA	NA	5.75527
rs77450464	-1.81151	0.359888	-0.325289	1.40445e-05	0.264803	NA	NA	15.2232
rs78958026	-5.55644	0.365466	-1.14359	1.39008e-05	0.206232	NA	NA	17.0684
rs16866524	0.697652	0.366156	0.14824	7.45095e-06	0.205875	NA	NA	17.5246
rs73723635	-2.71355	0.366992	0.358047	7.16916e-08	0.513037	NA	NA	11.6567
rs75883103	-5.53904	0.367197	-1.13328	1.3947e-05	0.210489	NA	NA	16.9848
rs142930187	-5.53598	0.367471	-1.14981	1.37607e-05	0.203971	NA	NA	17.1978
rs138508820.COSV60194152.COSV60196257	-5.53598	0.367471	-1.14981	1.37607e-05	0.203971	NA	NA	17.1978
rs138809000	-5.53598	0.367471	-1.14981	1.37607e-05	0.203971	NA	NA	17.1978
rs75759688	-5.54097	0.367579	-1.14473	1.39908e-05	0.206632	NA	NA	17.122
rs117225291	-1.83748	0.370889	0.636111	1.74285e-05	0.0335271	NA	NA	25.7161
rs1869827	-1.92733	0.37121	0.269063	4.79955e-07	0.464426	NA	NA	12.2502
rs74839819	-2.26051	0.371753	-0.419358	9.96239e-06	0.275005	NA	NA	15.6485
rs74742299.1	0.806823	0.379086	-0.227259	1.25491e-06	0.13128	NA	NA	21.9769
rs28449551	-4.59027	0.379319	1.64581	1.2583e-05	0.033548	NA	NA	26.3918
rs118120551	3.53412	0.381692	-0.914311	1.38645e-05	0.125158	NA	NA	20.5536
rs138951419	-3.74874	0.384147	1.36652	1.06527e-05	0.033657	NA	NA	26.7146
rs147905017	-5.32965	0.385395	-1.17903	1.32128e-05	0.193694	NA	NA	18.1148
rs112434816	-0.722593	0.388522	0.286419	3.87755e-06	0.033156	NA	NA	28.3861
rs79174017	-2.50106	0.391313	-0.589591	2.30066e-06	0.206541	NA	NA	19.0766
rs4468946	-0.696189	0.391801	0.251129	1.74775e-05	0.0340022	NA	NA	26.5095
rs72857725	1.64038	0.39932	0.0488883	2.17548e-06	0.875476	NA	NA	2.89404
rs182884588	-2.24433	0.400651	-0.508065	1.10966e-05	0.201418	NA	NA	18.459
rs114464446	-2.24433	0.400651	-0.508065	1.10966e-05	0.201418	NA	NA	18.459
rs76108164	2.26007	0.401107	-0.625994	7.19903e-06	0.126207	NA	NA	21.6902
rs10843210	-0.419723	0.404149	0.154858	1.81739e-05	0.0342907	NA	NA	26.9515
rs9409617	0.642317	0.408023	-0.178862	8.46897e-06	0.126849	NA	NA	21.7812
rs150977137	4.8708	0.41633	1.62818	1.80518e-05	0.0618709	NA	NA	25.0528
rs117020986	-2.24502	0.416499	0.853779	1.64084e-05	0.0345289	NA	NA	27.5519
rs115260164	-1.70544	0.425548	-0.0455537	1.51946e-05	0.0638768	3.58568e-07	0.143304	2.60159
rs115423851	2.74726	0.426737	1.00176	4.82699e-06	0.0614563	NA	NA	26.7206
rs114687431	2.23338	0.438518	0.793132	9.6776e-06	0.0671124	NA	NA	26.2062
rs12232572	1.51451	0.44227	-0.65254	3.76676e-06	0.0346726	NA	NA	30.1119
rs150476682	-5.68237	0.44246	2.46362	6.48522e-06	0.0295493	NA	NA	30.2433
rs111509066	-1.76925	0.444457	0.715147	1.53042e-05	0.0351147	NA	NA	28.7855
rs60056594	-2.53561	0.44632	1.03266	1.42626e-05	0.035134	NA	NA	28.9402
rs139895115	-5.62248	0.448571	2.43055	6.63115e-06	0.0322044	NA	NA	30.1818
rs117261313	-5.60016	0.450349	2.39236	6.46594e-06	0.034999	NA	NA	29.9325
rs145868200	-5.60016	0.450349	2.39236	6.46594e-06	0.034999	NA	NA	29.9325
rs145884040	-2.67201	0.451589	1.34134	8.32742e-06	0.0795188	9.32701e-09	0.730659	33.422
rs72789334	0.715019	0.45494	0.0540314	1.19503e-06	0.731269	NA	NA	7.02572
rs117333627	1.38861	0.455074	-0.458493	1.66006e-06	0.12843	NA	NA	24.8223
rs147847023	3.45326	0.456951	1.35245	6.37279e-06	0.0624367	NA	NA	28.1425
rs113500977	-2.36055	0.463644	0.321606	1.38235e-06	0.541066	NA	NA	11.9906
rs117392134	-5.40964	0.465447	2.39731	1.00567e-05	0.0309052	NA	NA	30.7074
JHU_4.102594138	0.355821	0.465507	0.143736	1.46307e-05	0.0459213	NA	NA	28.7728
rs189390391	-5.40809	0.46648	2.35759	1.05559e-05	0.0340368	NA	NA	30.359
rs141668738	-5.36989	0.468765	2.33454	1.00014e-05	0.035518	NA	NA	30.3012
rs117389913	-5.36989	0.468765	2.33454	1.00014e-05	0.035518	NA	NA	30.3012
rs117131205	-5.36989	0.468765	2.33454	1.00014e-05	0.035518	NA	NA	30.3012
rs79663439	-5.36989	0.468765	2.33454	1.00014e-05	0.035518	NA	NA	30.3012
rs864821	-0.617064	0.46893	0.260183	1.82785e-05	0.0356854	NA	NA	29.659
rs138291117	4.35877	0.469014	-1.3688	8.96328e-06	0.130852	NA	NA	23.8984
rs144299950	-5.3675	0.469206	2.33018	1.01173e-05	0.0359659	NA	NA	30.2712
rs115876643	-2.34175	0.470516	0.331002	8.20791e-07	0.540833	NA	NA	12.3843
rs3760739	-0.384744	0.470802	0.118166	1.48367e-05	0.13144	NA	NA	23.4965
rs145455370	-5.34371	0.471473	2.29632	9.84671e-06	0.0393539	NA	NA	30.0564
rs79243018	-3.10651	0.475803	-0.834597	1.3243e-05	0.194458	NA	NA	21.1767
rs116170736	1.0651	0.47848	0.453116	2.07902e-06	0.0611784	NA	NA	29.8452
rs4561537	0.677997	0.487391	0.301286	8.4628e-06	0.0424106	NA	NA	30.766
rs145458445	-2.43282	0.487711	0.869787	1.26647e-06	0.130406	NA	NA	26.3364
rs145529594	-2.41889	0.490229	0.852154	1.27539e-06	0.138508	NA	NA	26.0514
rs4437734	-0.377801	0.493848	0.168467	8.7755e-06	0.0431009	NA	NA	30.8396
rs4707795	-0.434915	0.495313	-0.130946	2.69853e-06	0.196383	NA	NA	23.1411
rs9596751	-0.574825	0.498456	0.264413	1.17497e-05	0.0361891	NA	NA	31.5063
rs6536093	-0.364621	0.498726	0.117546	1.82947e-05	0.133323	NA	NA	24.3787
rs184301693	2.73872	0.499186	0.254119	1.05699e-06	0.70415	NA	NA	8.49091
rs114698522	1.67658	0.499542	0.763987	1.34846e-06	0.0601379	NA	NA	31.3037
rs115436176	1.63619	0.503656	0.168322	1.19844e-07	0.700869	NA	NA	9.32782
rs114823866	1.64125	0.508726	0.774507	1.35391e-06	0.0570052	NA	NA	32.0606
rs74392178	-1.24285	0.510757	-0.394289	1.90483e-06	0.195787	NA	NA	24.084
rs150026771	4.84507	0.511181	-2.03417	7.02734e-08	0.130074	NA	NA	29.5697
rs6557316	-0.332991	0.515237	0.166123	4.77006e-06	0.0363433	NA	NA	33.2835
rs6557316.1	-0.332991	0.515237	0.166123	4.77006e-06	0.0363433	NA	NA	33.2835
rs117859772	-3.86912	0.517648	1.86271	9.97285e-06	0.0381905	NA	NA	32.4976
rs9463642	-2.18441	0.51813	1.07533	6.11081e-06	0.0381382	NA	NA	32.9882
rs7710712	2.38189	0.527105	0.24047	1.07808e-06	0.698786	NA	NA	9.16999
rs113368918	2.12587	0.530009	0.998985	9.28941e-06	0.0497701	NA	NA	31.969
rs13183250	0.477901	0.533742	0.222035	7.10513e-06	0.0575512	NA	NA	31.7222
rs535474272	-1.11562	0.535439	-0.384538	4.55582e-06	0.170475	NA	NA	25.6333
rs151024901	2.21822	0.537305	-0.781681	1.74268e-05	0.13555	NA	NA	26.0569
rs116866072	-2.636	0.541963	-0.828922	1.66944e-05	0.188842	NA	NA	23.9232
rs76232597	-1.79132	0.54242	-0.63105	1.03774e-06	0.194287	NA	NA	26.0509
rs2303430.COSV99958199	0.349111	0.545898	-0.177871	1.02607e-05	0.0400838	NA	NA	33.7528
rs114674819	4.40357	0.547309	0.474746	9.67849e-07	0.695413	NA	NA	9.73177
JHU_8.88692399	-0.33695	0.548946	0.177837	7.61851e-06	0.0371496	NA	NA	34.5458
rs1544279	-0.379256	0.556332	0.0676031	1.77339e-07	0.552427	NA	NA	15.1285
rs76108114	2.24493	0.557796	-0.88756	4.53778e-06	0.135791	NA	NA	28.334
rs117129608	-2.67288	0.563734	1.44154	1.02001e-05	0.0375079	NA	NA	35.0363
rs73953618	2.99508	0.567223	-0.754048	1.91925e-08	0.447696	NA	NA	20.1126
rs138766114	1.99551	0.568847	-0.75645	1.80575e-05	0.137391	NA	NA	27.4877
rs148141096	1.99551	0.568847	-0.75645	1.80575e-05	0.137391	NA	NA	27.4877
rs2139515	0.480255	0.572336	-0.26404	1.06394e-05	0.0376904	NA	NA	35.4751
rs114006288	-0.573859	0.578006	0.27586	6.05568e-06	0.0926348	NA	NA	32.4649
imm_16_73929421	0.284833	0.587874	-0.0344691	4.37143e-07	0.701089	NA	NA	10.7951
rs3760440	0.291443	0.590624	-0.172493	6.04628e-06	0.0379745	NA	NA	37.1803
rs1996707	-2.81915	0.596133	-1.08934	4.55624e-06	0.187299	NA	NA	27.8712
rs76401327	0.762418	0.600187	0.403322	1.5142e-05	0.0589875	NA	NA	34.5979
rs56173940	-0.731548	0.600908	0.132849	1.16059e-06	0.563691	NA	NA	15.369
imm_16_73992379	-0.267001	0.615527	-0.00624183	5.56694e-07	0.945413	NA	NA	2.28435
rs74606713	-3.63749	0.622089	0.514778	3.71092e-07	0.0118337	9.5897e-07	0.0027672	12.3975
rs17071497	-3.63749	0.622089	0.514778	3.71092e-07	0.0118337	9.5897e-07	0.0027672	12.3975
rs73338617	-0.736013	0.629626	0.468094	1.20282e-05	0.0388566	NA	NA	38.8748
rs111347886	-2.86961	0.630413	-1.2511	3.49167e-06	0.185493	NA	NA	30.3613
rs10437747	-0.498862	0.630702	-0.307879	5.06607e-06	0.0550482	NA	NA	38.1633
rs115054514	1.02547	0.632099	0.496991	6.1242e-06	0.0490997	5.31737e-07	0.583154	32.644
rs76250915.COSV60756928	-0.552309	0.633898	0.170512	1.6585e-06	0.378148	NA	NA	23.5898
rs17402704	-0.441925	0.638164	0.200304	1.72688e-05	0.143762	NA	NA	31.1889
rs2203088	-0.224173	0.641177	-0.140539	7.41239e-06	0.0545008	NA	NA	38.5343
rs57519512	1.11363	0.641591	0.167751	4.69889e-07	0.680706	NA	NA	13.0914
JHU_11.41911004	-0.238783	0.643765	0.106282	8.81494e-06	0.17302	NA	NA	30.8006
rs9409438	0.363557	0.645679	-0.170673	1.48403e-05	0.141591	NA	NA	31.9475
rs72773968.COSV99031664	-0.415523	0.650008	0.198801	1.31046e-05	0.141771	NA	NA	32.3609
rs72773968.COSV99031664.1	-0.415523	0.650008	0.198801	1.31046e-05	0.141771	NA	NA	32.3609
rs7160733	-0.22797	0.656616	0.153648	1.80393e-05	0.0394306	NA	NA	40.2622
rs55730213	0.344846	0.656808	-0.170259	1.04437e-05	0.142046	NA	NA	33.0532
rs149276357	-1.28796	0.664398	0.285599	4.72667e-07	0.57228	NA	NA	18.1499
rs111267874	0.388553	0.664862	-0.19996	3.82807e-06	0.168016	NA	NA	33.9771
rs2494732.COSV62573275	-0.214757	0.6678	0.170309	1.07183e-06	0.039435	NA	NA	44.2285
imm_16_73994062	-0.222413	0.673205	-0.0161684	6.77089e-07	0.85531	NA	NA	6.77691
rs60716510	-0.916312	0.680568	-0.0796408	3.22443e-06	0.820427	NA	NA	7.99644
rs148764537.COSV61115419	1.64982	0.681315	0.320158	2.31913e-07	0.648726	NA	NA	16.2519
rs8082814	-0.726133	0.682972	0.165557	6.31865e-07	0.580959	NA	NA	18.5667
rs77051500	-0.928757	0.683376	0.740021	3.09788e-06	0.0398266	NA	NA	44.3451
X8.10622924.TTTC.T	1.59032	0.691313	0.227865	1.98198e-06	0.008946	1.53593e-06	0.00371355	12.5325
rs150123805	-2.12134	0.691779	0.598785	4.77347e-09	0.571022	NA	NA	22.0132
rs73029631	0.964677	0.691828	0.510918	3.64262e-06	0.180813	NA	NA	34.6245
rs72773922	-0.361541	0.697877	0.201039	1.2867e-05	0.144416	NA	NA	35.7352
rs72773923	-0.361541	0.697877	0.201039	1.2867e-05	0.144416	NA	NA	35.7352
rs72773932	-0.361541	0.697877	0.201039	1.2867e-05	0.144416	NA	NA	35.7352
rs11750934	-0.361541	0.697877	0.201039	1.2867e-05	0.144416	NA	NA	35.7352
rs11738810	-0.361541	0.697877	0.201039	1.2867e-05	0.144416	NA	NA	35.7352
rs11748519	-0.361541	0.697877	0.201039	1.2867e-05	0.144416	NA	NA	35.7352
rs11743410	-0.361541	0.697877	0.201039	1.2867e-05	0.144416	NA	NA	35.7352
rs10515249	-0.361541	0.697877	0.201039	1.2867e-05	0.144416	NA	NA	35.7352
rs72773924	-0.356202	0.702329	0.200894	1.27432e-05	0.145421	NA	NA	36.061
JHU_15.57537722	-1.30361	0.71044	0.335347	3.52815e-07	0.579202	NA	NA	20.461
imm_16_73870986	-0.194308	0.711551	-0.0195251	2.40726e-06	0.815945	NA	NA	9.13099
rs78835307	-0.683989	0.713348	0.536409	1.7321e-05	0.0488926	NA	NA	43.9536
rs77776973	-1.134	0.71436	-0.629371	8.53771e-06	0.178137	NA	NA	35.6914
rs538287	0.184533	0.723798	-0.149224	1.60709e-05	0.0519007	NA	NA	44.7104
rs28564459	1.14454	0.726121	0.256113	4.72279e-08	0.670905	NA	NA	18.2853
rs74118705	-0.393878	0.726585	0.259527	3.00331e-06	0.145561	NA	NA	39.7192
imm_16_73876147	-0.182843	0.727524	-0.0199221	1.92232e-06	0.81377	NA	NA	9.82523
imm_16_73878328	-0.182843	0.727524	-0.0199221	1.92232e-06	0.81377	NA	NA	9.82523
JHU_1.210428777	-0.193962	0.72984	-0.17181	3.17071e-06	0.0527377	NA	NA	46.972
rs72773947	-0.319793	0.730782	0.18936	1.11475e-05	0.171793	NA	NA	37.1912
imm_16_73950307	0.178659	0.73158	-0.0244995	6.20627e-07	0.780872	NA	NA	12.0593
rs2056862	-0.162574	0.739988	0.164419	1.24768e-06	0.0409994	NA	NA	50.2821
rs7882468	-0.322786	0.744095	0.331285	1.29057e-06	0.0410875	NA	NA	50.6497
rs17013105	1.522	0.744636	-1.02445	8.31814e-06	0.146918	NA	NA	40.2305
rs56319744	-0.295865	0.750088	0.173339	1.01723e-05	0.212457	NA	NA	36.9433
rs9727148	0.934018	0.750681	0.124386	2.09847e-06	0.792489	NA	NA	11.7523
imm_16_74041307	0.16304	0.753853	-0.0293067	1.20306e-06	0.731545	NA	NA	15.2364
rs114051767	1.21701	0.762646	0.292895	1.14723e-06	0.65881	NA	NA	19.3983
rs116202570	-1.29185	0.76344	1.67141	1.54088e-08	0.0416734	NA	NA	56.4043
imm_16_73980404	-0.157043	0.765412	-0.0189392	9.52727e-07	0.828301	NA	NA	10.762
imm_16_73989835	-0.157053	0.765548	-0.0211799	8.91445e-07	0.808871	NA	NA	11.8833
rs144647750	1.02503	0.76855	-0.774725	5.66067e-06	0.148152	NA	NA	43.0461
rs59285907	0.785874	0.769602	0.769985	1.46196e-05	0.0509593	NA	NA	49.4894
rs11914543	0.484071	0.771371	0.532714	1.15864e-06	0.0522052	NA	NA	52.392
rs79547784	-1.362	0.771595	1.40321	1.36355e-05	0.0427962	NA	NA	50.7453
rs4756680	-0.148589	0.774193	0.115855	4.31832e-06	0.151044	NA	NA	43.8109
rs13026592	0.137189	0.781045	-0.146196	1.79313e-05	0.041811	NA	NA	51.5893
rs184215464	-0.359859	0.783461	0.0725033	1.17844e-06	0.736319	NA	NA	16.7691
imm_16_73870049	-0.138798	0.79096	-0.0142295	3.60594e-06	0.862543	NA	NA	9.29868
rs35508255	0.668095	0.802184	-0.580763	8.03796e-06	0.150071	NA	NA	46.5035
imm_16_73951900	0.12984	0.804734	-0.0289094	6.35611e-07	0.743991	NA	NA	18.2107
rs35263058	0.128548	0.806554	-0.0294442	6.19471e-07	0.739417	NA	NA	18.6366
imm_16_73954382	-0.128237	0.807037	-0.0216129	1.33575e-06	0.801327	NA	NA	14.4231
imm_16_73980261	-0.128237	0.807037	-0.0216129	1.33575e-06	0.801327	NA	NA	14.4231
rs242682	-0.562267	0.810543	-0.499087	4.06694e-06	0.172865	NA	NA	47.0236
imm_16_73942919	0.122067	0.817292	-0.0258905	1.98805e-06	0.761028	NA	NA	17.4986
exm2271703	0.103253	0.828146	0.13756	1.40026e-05	0.0496796	NA	NA	57.123
rs11857175	-0.192741	0.831869	-0.0696343	6.29977e-07	0.649003	NA	NA	26.54
imm_16_73993232	-0.111358	0.832163	-0.0257715	4.06466e-07	0.774784	NA	NA	18.7936
rs17171504	-0.192379	0.833226	-0.285456	2.4719e-06	0.0503169	NA	NA	59.7395
rs147319068	1.2656	0.833849	-1.43585	9.28213e-07	0.151902	NA	NA	53.1511
imm_16_73893931	0.110363	0.834256	-0.0260416	8.44411e-07	0.767751	NA	NA	19.0915
rs76385638	-0.675076	0.842497	-0.798102	2.67944e-07	0.177324	NA	NA	54.1755
rs373885001	0.912151	0.843683	-0.99255	9.75047e-06	0.152363	NA	NA	52.1105
rs77648144	0.386435	0.844782	-0.416368	1.37566e-05	0.152411	NA	NA	51.8643
rs142628952	-0.372024	0.846035	-0.412196	3.54194e-06	0.17077	NA	NA	52.5612
imm_16_73889836	0.10148	0.846124	-0.0250018	5.52489e-07	0.77783	NA	NA	19.7671
rs151079256	-0.823904	0.846582	1.39144	1.83408e-06	0.0432604	NA	NA	62.8092
imm_16_73999114	-0.101528	0.847297	-0.0252218	4.71198e-07	0.779008	NA	NA	19.8988
imm_16_73960563	-0.102197	0.847317	-0.0235728	5.68069e-07	0.793275	NA	NA	18.7428
rs145873923	-1.11924	0.852187	1.78891	1.41275e-05	0.043189	NA	NA	61.5137
imm_16_73993732	-0.097545	0.853084	-0.0269888	3.80004e-07	0.765844	NA	NA	21.6718
rs12307709	0.0832068	0.861395	0.142277	7.59483e-06	0.0492058	NA	NA	63.0985
imm_16_74003176	-0.0918864	0.861494	-0.0233858	3.66807e-07	0.796359	NA	NA	20.2874
imm_16_74024197	-0.0907285	0.861704	-0.0225384	1.59813e-06	0.789995	NA	NA	19.8985
imm_16_73929245	-0.0907976	0.863305	-0.0226721	1.43115e-06	0.792151	NA	NA	19.9807
imm_16_74006677	-0.0905473	0.863627	-0.0236468	4.03814e-07	0.793506	NA	NA	20.7076
rs76318746	-1.02123	0.865183	-1.28813	4.21992e-06	0.169432	NA	NA	55.7787
rs143037153	-1.02123	0.865183	-1.28813	4.21992e-06	0.169432	NA	NA	55.7787
rs192482164	0.8914	0.865963	-1.33579	5.08492e-07	0.137012	NA	NA	59.9765
imm_16_74033864	-0.0873313	0.867263	-0.0222991	1.91476e-06	0.791194	NA	NA	20.3402
imm_16_74033952	-0.0873313	0.867263	-0.0222991	1.91476e-06	0.791194	NA	NA	20.3402
imm_16_74024348	-0.0869177	0.867308	-0.0224104	1.47569e-06	0.791477	NA	NA	20.4983
COSV52212082	0.0863516	0.869766	-0.0271733	1.25787e-06	0.753475	NA	NA	23.936
imm_16_73994214	-0.0845844	0.872567	-0.0191916	8.01283e-07	0.827736	NA	NA	18.4933
imm_16_73917597	0.0836848	0.872946	-0.0267042	2.03979e-06	0.750921	NA	NA	24.191
rs55927720	-0.0924069	0.875352	0.186427	3.64577e-06	0.0437929	NA	NA	66.8596
imm_16_73945935	0.0806874	0.878269	-0.0294668	9.19424e-07	0.736389	NA	NA	26.7505
imm_16_74035948	-0.0805675	0.878418	-0.0230209	1.2506e-06	0.789879	NA	NA	22.2234
imm_16_74028487	-0.0783437	0.879966	-0.0220978	2.61847e-06	0.788868	NA	NA	22.0007
rs142417959	1.07787	0.882087	2.1508	9.58355e-06	0.0486638	NA	NA	66.6157
imm_16_74040633	-0.0779543	0.882296	-0.0229126	1.53867e-06	0.789049	NA	NA	22.7156
imm_16_73872130	-0.0765877	0.884094	-0.0443499	3.64573e-07	0.624196	NA	NA	36.6717
imm_16_73985598	-0.0750702	0.886552	-0.0241081	3.75727e-07	0.789734	NA	NA	24.3078
imm_16_73985807	-0.0750702	0.886552	-0.0241081	3.75727e-07	0.789734	NA	NA	24.3078
imm_16_73995970	-0.0750702	0.886552	-0.0241081	3.75727e-07	0.789734	NA	NA	24.3078
imm_16_73999861	-0.0750702	0.886552	-0.0241081	3.75727e-07	0.789734	NA	NA	24.3078
imm_16_74007540	-0.0750702	0.886552	-0.0241081	3.75727e-07	0.789734	NA	NA	24.3078
imm_16_74011905	-0.0749184	0.886844	-0.0237158	3.88368e-07	0.793061	NA	NA	24.0442
rs16938394	-0.25237	0.886871	-0.364022	1.16752e-05	0.167306	NA	NA	59.0568
rs4457736	-0.25237	0.886871	-0.364022	1.16752e-05	0.167306	NA	NA	59.0568
rs111870807	-0.315817	0.886896	-0.44216	3.94414e-06	0.20347	NA	NA	58.3342
COSV52210145	-0.0744641	0.887646	-0.0242217	3.56862e-07	0.789614	NA	NA	24.5443
rs117189518	-1.03379	0.88779	-1.63227	8.7007e-06	0.140115	NA	NA	61.2239
imm_16_73877217	-0.0732306	0.888939	-0.0237966	5.34429e-07	0.789005	NA	NA	24.5257
imm_16_73889073	0.0726909	0.889413	-0.0280863	4.56503e-07	0.752802	NA	NA	27.8697
rs9560371	-0.37235	0.889821	-0.580105	3.82067e-06	0.168008	NA	NA	60.9063
imm_16_73989331	-0.0727513	0.890022	-0.0277005	3.79727e-07	0.759326	NA	NA	27.5759
imm_16_73878532	-0.0723441	0.890275	-0.0239546	4.51926e-07	0.78894	NA	NA	24.8753
imm_16_73880074	-0.0723441	0.890275	-0.0239546	4.51926e-07	0.78894	NA	NA	24.8753
imm_16_73881341	-0.0723441	0.890275	-0.0239546	4.51926e-07	0.78894	NA	NA	24.8753
rs10967875	0.0835351	0.891443	0.177734	1.45801e-05	0.0483098	NA	NA	68.0272
rs79270317	0.549039	0.891449	1.17126	1.19117e-05	0.0501298	NA	NA	68.0847
rs112530541	0.380678	0.892253	-0.58424	9.47253e-06	0.167825	NA	NA	60.5482
rs17028895	0.10554	0.893402	0.158884	1.69498e-05	0.16664	NA	NA	60.0867
imm_16_74001317	-0.0698058	0.894277	-0.0224448	3.84938e-07	0.803538	NA	NA	24.3303
imm_16_73990575	-0.0693833	0.894733	-0.0384647	3.85729e-07	0.669319	NA	NA	35.6657
COSV52210893	0.0697106	0.895228	-0.012423	7.3912e-07	0.889386	NA	NA	15.1254
rs116324835	-0.319503	0.897077	-0.50745	1.17266e-05	0.166715	NA	NA	61.3638
imm_16_73975421	-0.0677769	0.897251	-0.0259863	6.26874e-07	0.769078	NA	NA	27.7148
imm_16_74046436	-0.0678214	0.897518	-0.019453	1.39015e-06	0.821162	NA	NA	22.2895
imm_16_74000684	-0.0672612	0.898384	-0.0215745	5.28037e-07	0.809316	NA	NA	24.2859
imm_16_74008671	-0.0669208	0.89889	-0.0232122	4.2406e-07	0.796781	NA	NA	25.7533
rs143857932	-0.913782	0.90062	-1.5616	8.63802e-06	0.157939	NA	NA	63.0853
rs115737163	0.184261	0.903202	-0.470741	5.19485e-06	0.044322	NA	NA	71.8686
imm_16_74028077	-0.0631625	0.904069	-0.0219894	1.94146e-06	0.794625	NA	NA	25.8237
imm_16_73894180	0.0630036	0.90435	-0.0273533	7.39683e-07	0.755412	NA	NA	30.2725
imm_16_73901977	-0.0626823	0.905586	-0.0247832	2.94927e-07	0.786754	NA	NA	28.3348
rs10514393	-0.0626823	0.905586	-0.0247832	2.94927e-07	0.786754	NA	NA	28.3348
imm_16_74012949	-0.0601445	0.908946	-0.0227775	6.32286e-07	0.797247	NA	NA	27.4686
COSV52208992	0.0600146	0.909079	-0.0278742	4.47759e-07	0.756017	NA	NA	31.7153
rs73624941	0.206162	0.90957	0.533114	1.20108e-05	0.0480451	NA	NA	72.113
imm_16_73983054	0.0594152	0.909693	-0.02699	9.20573e-07	0.75634	NA	NA	31.2366
rs824883	-0.085933	0.91225	0.244101	4.30415e-06	0.0445368	NA	NA	73.9623
JHU_3.56847944	0.0551313	0.913029	0.156489	3.62114e-06	0.0483296	NA	NA	73.9479
COSV52209447	-0.0571943	0.913594	-0.0215037	5.62451e-07	0.809628	NA	NA	27.3244
imm_16_74019330	-0.0567017	0.913621	-0.0239209	7.38476e-07	0.784684	NA	NA	29.6702
imm_16_74020214	-0.0567017	0.913621	-0.0239209	7.38476e-07	0.784684	NA	NA	29.6702
imm_16_73886092	-0.0554441	0.915216	-0.0231729	1.65612e-06	0.783788	NA	NA	29.4757
imm_16_73958247	0.0548922	0.916909	-0.027711	4.67126e-07	0.757309	NA	NA	33.5471
imm_16_73981655	-0.0533877	0.91884	-0.023743	1.08731e-06	0.783543	NA	NA	30.7828
imm_16_73897732	-0.0526417	0.920281	-0.0255105	3.7959e-07	0.777779	NA	NA	32.642
imm_16_73950853	0.0525163	0.920493	-0.0289088	4.80061e-07	0.74706	NA	NA	35.5035
imm_16_74029923	-0.0495527	0.923928	-0.0225472	3.58961e-06	0.781842	NA	NA	31.2722
imm_16_74019582	-0.0486416	0.925929	-0.0230391	8.30493e-07	0.79181	NA	NA	32.1413
rs78337173	-0.124057	0.926116	0.391674	1.73443e-05	0.0447225	NA	NA	75.9454
rs565615420	-0.947491	0.926515	3.33365	5.56905e-06	0.0365256	NA	NA	77.8683
rs17176375	0.0880247	0.926665	-0.288469	9.41037e-06	0.044707	NA	NA	76.6199
rs78337173.1	-0.121838	0.927403	0.391688	1.71474e-05	0.0446236	NA	NA	76.2742
imm_16_73971877	0.0475674	0.927533	-0.0257094	8.28722e-07	0.768268	NA	NA	35.0853
imm_16_73943850	0.04787	0.92794	-0.0265951	1.25993e-06	0.759309	NA	NA	35.7148
rs4888383	0.04787	0.92794	-0.0265951	1.25993e-06	0.759309	NA	NA	35.7148
imm_16_73960625	0.0472585	0.928469	-0.0261361	1.19078e-06	0.762737	NA	NA	35.6103
COSV52210879	0.047073	0.928709	-0.0265181	1.15285e-06	0.759412	NA	NA	36.0343
imm_16_73968946	0.047073	0.928709	-0.0265181	1.15285e-06	0.759412	NA	NA	36.0343
imm_16_73969022	0.047073	0.928709	-0.0265181	1.15285e-06	0.759412	NA	NA	36.0343
imm_16_73969120	0.047073	0.928709	-0.0265181	1.15285e-06	0.759412	NA	NA	36.0343
imm_16_73970408	0.047073	0.928709	-0.0265181	1.15285e-06	0.759412	NA	NA	36.0343
imm_16_73980318	-0.0468517	0.928854	-0.0245229	5.65981e-07	0.782401	NA	NA	34.358
imm_16_73985697	-0.0468517	0.928854	-0.0245229	5.65981e-07	0.782401	NA	NA	34.358
imm_16_73999644	-0.0468517	0.928854	-0.0245229	5.65981e-07	0.782401	NA	NA	34.358
imm_16_73999645	-0.0468517	0.928854	-0.0245229	5.65981e-07	0.782401	NA	NA	34.358
rs76321912	-0.108577	0.929309	0.26825	4.79672e-06	0.157265	NA	NA	71.1864
rs62443591	0.0828971	0.931552	-0.285094	9.78127e-06	0.049007	NA	NA	77.4731
JHU_16.75442142	-0.0430373	0.934754	-0.0237722	8.01291e-07	0.786633	NA	NA	35.582
imm_16_73988310	-0.0428902	0.935026	-0.0209515	9.04079e-07	0.811025	NA	NA	32.8179
imm_16_73886981	-0.0422644	0.935324	-0.0249327	1.45516e-06	0.769422	NA	NA	37.1039
imm_16_73950632	-0.0425706	0.935521	-0.0248543	4.83081e-07	0.781414	NA	NA	36.8623
imm_16_74006422	0.0420782	0.936425	-0.0248125	9.68555e-07	0.776923	NA	NA	37.0941
imm_16_73923590	-0.0404753	0.938392	-0.0360554	8.74253e-07	0.679729	NA	NA	47.1124
rs191830054	-0.38736	0.939814	-1.61193	1.55248e-05	0.0325187	NA	NA	80.6251
COSV52211687	-0.0385919	0.941427	-0.0236341	6.38324e-07	0.789466	NA	NA	37.9811
imm_16_73889068	-0.0367806	0.943854	-0.0235536	2.01326e-06	0.779183	NA	NA	39.0385
rs148475876	-0.717802	0.944316	3.2167	5.1413e-06	0.0429926	NA	NA	81.7562
rs79066822	-0.220099	0.944361	-0.663088	8.1985e-06	0.16425	NA	NA	75.079
rs773905945.COSV51657690	-0.713168	0.944675	3.19524	5.16927e-06	0.0443469	NA	NA	81.753
imm_16_73963380	-0.0363535	0.945131	-0.0215465	1.08218e-06	0.805059	NA	NA	37.2133
rs41303348	-0.683742	0.946934	3.17968	5.14553e-06	0.045227	NA	NA	82.3022
rs200749025	-0.683742	0.946934	3.17968	5.14553e-06	0.045227	NA	NA	82.3022
rs147526482	-0.683742	0.946934	3.17968	5.14553e-06	0.045227	NA	NA	82.3022
rs201288428.COSV55830330	-0.683742	0.946934	3.17968	5.14553e-06	0.045227	NA	NA	82.3022
rs150470903	-0.683742	0.946934	3.17968	5.14553e-06	0.045227	NA	NA	82.3022
rs145975508.COSV61734445	-0.683742	0.946934	3.17968	5.14553e-06	0.045227	NA	NA	82.3022
rs199968197	-0.683742	0.946934	3.17968	5.14553e-06	0.045227	NA	NA	82.3022
rs149736299	-0.683742	0.946934	3.17968	5.14553e-06	0.045227	NA	NA	82.3022
X15.45412400.GAGA.G	-0.683742	0.946934	3.17968	5.14553e-06	0.045227	NA	NA	82.3022
rs368081185.COSV60889751	-0.683742	0.946934	3.17968	5.14553e-06	0.045227	NA	NA	82.3022
rs144333393	-0.683742	0.946934	3.17968	5.14553e-06	0.045227	NA	NA	82.3022
rs539897980	-0.683742	0.946934	3.17968	5.14553e-06	0.045227	NA	NA	82.3022
rs141623013.COSV100652098	-0.683742	0.946934	3.17968	5.14553e-06	0.045227	NA	NA	82.3022
rs117100657	-0.683888	0.947048	3.17672	5.29182e-06	0.0462901	NA	NA	82.2855
imm_16_73955753	0.0346623	0.947257	-0.0274168	3.0714e-07	0.76256	NA	NA	44.1643
imm_16_73954492	0.0346204	0.947289	-0.0274501	2.98945e-07	0.762238	NA	NA	44.2241
imm_16_73954788	0.0346204	0.947289	-0.0274501	2.98945e-07	0.762238	NA	NA	44.2241
rs28730722.COSV54862081	-0.676407	0.947558	3.1799	5.32261e-06	0.0453585	NA	NA	82.4597
rs138637165.CM1611198	-0.671282	0.947952	3.18136	5.32608e-06	0.0452395	NA	NA	82.5761
rs145087122	-0.670549	0.947978	3.17892	5.20932e-06	0.045374	NA	NA	82.5807
rs144659455	-0.333127	0.950325	0.464367	6.35046e-07	0.606439	NA	NA	58.2283
imm_16_73989891	0.0318817	0.951601	-0.0267144	6.16981e-07	0.762986	NA	NA	45.5908
JHU_16.75331043	-0.0301675	0.953971	-0.022662	2.21984e-06	0.786757	NA	NA	42.8965
imm_16_73888545	-0.0301675	0.953971	-0.022662	2.21984e-06	0.786757	NA	NA	42.8965
imm_16_74003106	-0.0301528	0.954508	-0.0218255	5.89886e-07	0.807669	NA	NA	41.9896
rs77205182	-0.0936202	0.954511	0.502027	6.57715e-06	0.0453368	NA	NA	84.2826
rs1489672	-0.0277786	0.954957	0.136413	1.06352e-05	0.0646563	NA	NA	83.0816
COSV62923459	0.0275129	0.95781	-0.0260059	8.53434e-07	0.763993	NA	NA	48.5921
imm_16_73951649	0.0265545	0.959547	-0.0249869	2.93578e-07	0.783215	NA	NA	48.4793
imm_16_73883434	0.0262701	0.959957	-0.0268377	4.21222e-07	0.764337	NA	NA	50.5344
imm_16_73962475	0.0255395	0.961232	-0.0261723	8.864e-07	0.764538	NA	NA	50.6118
JHU_X.68616542	0.0624498	0.966266	-0.314996	1.02729e-05	0.156582	NA	NA	83.4546
rs115195951	0.119189	0.96629	0.846062	8.5171e-06	0.0469162	NA	NA	87.652
imm_16_73969763	0.0219263	0.966599	-0.0458775	1.47095e-06	0.59147	NA	NA	67.6621
imm_16_73973332	-0.0218221	0.966834	-0.0237845	2.6832e-06	0.775493	NA	NA	52.1514
imm_16_73958614	-0.0222631	0.966869	-0.0303956	7.8723e-07	0.743857	NA	NA	57.7219
rs56916745	0.169136	0.968784	0.348319	8.86182e-07	0.62797	NA	NA	67.3139
imm_16_73953278	-0.0192658	0.970822	-0.0259604	3.88023e-07	0.774088	NA	NA	57.4013
imm_16_73968664	0.0174152	0.973694	-0.0283617	1.81923e-06	0.73998	NA	NA	61.9564
JHU_16.75422816	-0.0150657	0.977119	-0.0312877	3.88575e-07	0.728672	NA	NA	67.4982
imm_16_73966482	-0.0134932	0.979538	-0.0280009	2.29771e-06	0.739475	NA	NA	67.4817
rs77769808	0.0354925	0.982404	0.473362	1.33097e-05	0.0464648	NA	NA	93.025
imm_16_73972842	0.0100493	0.984815	-0.0225615	1.32533e-06	0.794704	NA	NA	69.1841
imm_16_73973276	-0.00653367	0.99006	-0.0249195	7.43495e-07	0.776702	NA	NA	79.2273
imm_16_73942660	-0.00167067	0.997479	-0.0243698	8.86694e-07	0.781808	NA	NA	93.5843
rs141023519	-0.00160441	0.999343	-0.408124	1.21442e-05	0.158262	NA	NA	99.6084

## Sheet: CardSort
SNP	Direct Effect	P-value of DE	Indirect effect	p-value of beta_k	p-value of alpha_k	p-value of beta_l	p-value of alpha_l	Percentage of Global effect explained by connectome
rs1489672	-1.45337	0.00317491	-0.0416701	1.06352e-05	0.571305	NA	NA	2.78723
rs111267874	2.23059	0.0137384	-0.253126	3.82807e-06	0.0836656	NA	NA	10.1914
rs1990985	6.04783	0.016736	-0.736446	4.3727e-07	0.0880534	NA	NA	10.8552
rs7160733	1.22498	0.0171664	-0.0945258	1.80393e-05	0.204983	NA	NA	7.16375
imm_16_73886981	1.22727	0.0183095	-0.0494908	1.45516e-06	0.559799	NA	NA	3.87629
imm_16_73917597	1.23399	0.0183825	-0.0501197	2.03979e-06	0.551002	NA	NA	3.90307
rs201135092	2.93404	0.0185678	-0.240885	7.93735e-06	0.201089	NA	NA	7.58711
imm_16_73889068	1.19196	0.0224957	-0.0490417	2.01326e-06	0.559104	NA	NA	3.95179
JHU_16.75331043	1.19289	0.0225112	-0.0487601	2.21984e-06	0.560325	NA	NA	3.92703
imm_16_73888545	1.19289	0.0225112	-0.0487601	2.21984e-06	0.560325	NA	NA	3.92703
COSV52212082	1.1831	0.024637	-0.0502744	1.25787e-06	0.560766	NA	NA	4.07617
rs72814539	2.87216	0.0262349	-0.118873	2.11001e-06	0.563832	NA	NA	3.97431
imm_16_73876147	1.15488	0.0278091	-0.0483299	1.92232e-06	0.567545	NA	NA	4.01675
imm_16_73878328	1.15488	0.0278091	-0.0483299	1.92232e-06	0.567545	NA	NA	4.01675
imm_16_73960563	1.15005	0.0301565	-0.0471024	5.68069e-07	0.600046	NA	NA	3.93455
rs7656250	-1.28618	0.0304944	-0.0534399	7.8053e-06	0.552159	NA	NA	3.9892
imm_16_74035948	1.1389	0.0306443	-0.0493612	1.2506e-06	0.567631	NA	NA	4.15407
rs117859772	-12.975	0.0308093	-0.511994	9.97285e-06	0.569832	NA	NA	3.79622
imm_16_73966482	1.13398	0.0313128	-0.0481654	2.29771e-06	0.567463	NA	NA	4.07442
imm_16_73954382	1.12381	0.0323841	-0.048685	1.33575e-06	0.570741	NA	NA	4.15224
imm_16_73980261	1.12381	0.0323841	-0.048685	1.33575e-06	0.570741	NA	NA	4.15224
rs2494732.COSV62573275	1.06896	0.0331506	-0.105256	1.07183e-06	0.203325	NA	NA	8.96395
imm_16_74046436	1.12375	0.0331805	-0.0485855	1.39015e-06	0.572866	NA	NA	4.14432
imm_16_73870986	1.11477	0.0339645	-0.0465996	2.40726e-06	0.578478	NA	NA	4.01248
rs16866524	1.63871	0.0344451	0.115772	7.45095e-06	0.323247	NA	NA	6.59863
imm_16_73980404	1.11369	0.0344728	-0.0483878	9.52727e-07	0.579538	NA	NA	4.16392
imm_16_73973332	1.10611	0.0351501	-0.0460062	2.6832e-06	0.581104	NA	NA	3.9932
rs9560371	-5.64944	0.0356826	-0.409025	3.82067e-06	0.331061	NA	NA	6.75129
imm_16_73893931	1.10589	0.0359312	-0.0438053	8.44411e-07	0.618977	NA	NA	3.81016
JHU_3.56847944	-1.0553	0.037027	-0.0469161	3.62114e-06	0.554001	NA	NA	4.25652
imm_16_73989835	1.09203	0.038224	-0.0491497	8.91445e-07	0.574561	NA	NA	4.30693
imm_16_73897732	1.08649	0.0388119	-0.0434151	3.7959e-07	0.630723	NA	NA	3.84235
imm_16_74040633	1.08319	0.039754	-0.0472174	1.53867e-06	0.581368	NA	NA	4.17702
imm_16_73994062	1.08566	0.0399642	-0.049286	6.77089e-07	0.578966	NA	NA	4.34257
imm_16_73929421	1.08013	0.0399891	-0.0509739	4.37143e-07	0.570302	NA	NA	4.50656
imm_16_73929245	1.08241	0.0402284	-0.0474463	1.43115e-06	0.581288	NA	NA	4.19933
rs115737163	3.10607	0.0408347	0.14142	5.19485e-06	0.545874	NA	NA	4.35475
imm_16_73886092	1.06502	0.0409554	-0.0463074	1.65612e-06	0.583454	NA	NA	4.16686
imm_16_74028077	1.07094	0.0411337	-0.0461356	1.94146e-06	0.585013	NA	NA	4.13005
imm_16_73950632	1.0694	0.0422347	-0.0503694	4.83081e-07	0.573881	NA	NA	4.49819
imm_16_73901977	1.06944	0.0431243	-0.0519485	2.94927e-07	0.570673	NA	NA	4.63251
rs10514393	1.06944	0.0431243	-0.0519485	2.94927e-07	0.570673	NA	NA	4.63251
rs139077812.COSV99056053	12.0402	0.0432113	-1.17335	2.70777e-06	0.214629	NA	NA	8.87984
rs77450464	-3.9909	0.044012	-0.271681	1.40445e-05	0.352239	NA	NA	6.37363
rs150977137	12.0856	0.044233	-1.04633	1.80518e-05	0.230683	NA	NA	7.96785
rs116202570	-8.64852	0.0444247	-0.435021	1.54088e-08	0.596176	NA	NA	4.78911
imm_16_73923590	1.04273	0.0474053	-0.0509452	8.74253e-07	0.561162	NA	NA	4.65816
imm_16_73889836	1.0339	0.0483392	-0.0474152	5.52489e-07	0.592899	NA	NA	4.38496
rs13306653	-1.27691	0.0499838	0.151377	1.60816e-05	0.111988	NA	NA	10.5984
rs5723.COSV55599716	-1.27691	0.0499838	0.151377	1.60816e-05	0.111988	NA	NA	10.5984
rs5729	-1.27691	0.0499838	0.151377	1.60816e-05	0.111988	NA	NA	10.5984
rs9922448	-1.27691	0.0499838	0.151377	1.60816e-05	0.111988	NA	NA	10.5984
rs4468946	1.58703	0.0515853	-0.142752	1.74775e-05	0.228639	NA	NA	8.25259
imm_16_73889073	1.01808	0.0516283	-0.0489325	4.56503e-07	0.583273	NA	NA	4.58593
JHU_1.210428777	-1.09173	0.0525499	0.108722	3.17071e-06	0.220708	NA	NA	9.05677
imm_16_73983054	1.0097	0.0540654	-0.0466892	9.20573e-07	0.591512	NA	NA	4.41972
JHU_16.75422816	1.01081	0.0541811	-0.0578744	3.88575e-07	0.520696	NA	NA	5.41546
imm_16_73877217	1.0047	0.0555385	-0.0481517	5.34429e-07	0.588268	NA	NA	4.57347
COSV52210893	1.00823	0.0575042	-0.0328819	7.3912e-07	0.713426	NA	NA	3.15835
JHU_15.57537722	6.67306	0.0575861	0.0876413	3.52815e-07	0.885439	NA	NA	1.29633
rs73723635	5.66867	0.0598248	0.0739282	7.16916e-08	0.893168	NA	NA	1.28736
COSV62923459	0.978244	0.0601589	-0.0458725	8.53434e-07	0.596491	NA	NA	4.47923
imm_16_73962475	0.981799	0.0618657	-0.0460872	8.864e-07	0.598013	NA	NA	4.48369
imm_16_73969763	0.983581	0.0621785	-0.0459935	1.47095e-06	0.593032	NA	NA	4.46723
imm_16_73878532	0.975753	0.0629737	-0.0477968	4.51926e-07	0.593399	NA	NA	4.66971
imm_16_73880074	0.975753	0.0629737	-0.0477968	4.51926e-07	0.593399	NA	NA	4.66971
imm_16_73881341	0.975753	0.0629737	-0.0477968	4.51926e-07	0.593399	NA	NA	4.66971
imm_16_73989891	0.976596	0.0631786	-0.0469666	6.16981e-07	0.596123	NA	NA	4.58854
JHU_16.75442142	0.972512	0.0644978	-0.0444624	8.01291e-07	0.612765	NA	NA	4.37203
rs182225157	-11.3941	0.0644996	-1.012	1.01357e-06	0.321043	NA	NA	8.15722
imm_16_73958247	0.970676	0.0652539	-0.0476152	4.67126e-07	0.595581	NA	NA	4.676
imm_16_73883434	0.965114	0.0652977	-0.0476389	4.21222e-07	0.594767	NA	NA	4.7039
imm_16_73950853	0.968472	0.0658893	-0.0487152	4.80061e-07	0.586976	NA	NA	4.78921
rs60056594	6.13797	0.0659782	-0.584816	1.42626e-05	0.233421	NA	NA	8.69902
imm_16_73960625	0.965924	0.0663693	-0.0413122	1.19078e-06	0.632912	NA	NA	4.10154
imm_16_73942919	0.966571	0.0667254	-0.0473432	1.98805e-06	0.57714	NA	NA	4.66935
COSV52210879	0.964079	0.0671001	-0.0448805	1.15285e-06	0.604387	NA	NA	4.4482
imm_16_73968946	0.964079	0.0671001	-0.0448805	1.15285e-06	0.604387	NA	NA	4.4482
imm_16_73969022	0.964079	0.0671001	-0.0448805	1.15285e-06	0.604387	NA	NA	4.4482
imm_16_73969120	0.964079	0.0671001	-0.0448805	1.15285e-06	0.604387	NA	NA	4.4482
imm_16_73970408	0.964079	0.0671001	-0.0448805	1.15285e-06	0.604387	NA	NA	4.4482
imm_16_73942660	0.968609	0.0674056	-0.0461082	8.86694e-07	0.600692	NA	NA	4.54394
COSV52211687	0.95984	0.067874	-0.046395	6.38324e-07	0.600389	NA	NA	4.61075
imm_16_73980318	0.958672	0.0679133	-0.0466793	5.65981e-07	0.599234	NA	NA	4.64308
imm_16_73985697	0.958672	0.0679133	-0.0466793	5.65981e-07	0.599234	NA	NA	4.64308
imm_16_73999644	0.958672	0.0679133	-0.0466793	5.65981e-07	0.599234	NA	NA	4.64308
imm_16_73999645	0.958672	0.0679133	-0.0466793	5.65981e-07	0.599234	NA	NA	4.64308
rs114698522	4.54233	0.0680889	-0.495465	1.34846e-06	0.223523	NA	NA	9.83495
imm_16_73943850	0.963361	0.0689732	-0.0447208	1.25993e-06	0.606568	NA	NA	4.43623
rs4888383	0.963361	0.0689732	-0.0447208	1.25993e-06	0.606568	NA	NA	4.43623
rs114823866	4.50893	0.0701816	-0.48975	1.35391e-06	0.229437	NA	NA	9.79758
imm_16_74012949	0.949542	0.0710072	-0.0486701	6.32286e-07	0.582961	NA	NA	4.87572
rs117776875	-18.8381	0.0710704	-1.49986	2.24865e-06	0.534015	6.26303e-06	0.846077	7.37471
imm_16_73872130	0.949462	0.0715528	-0.0462482	3.64573e-07	0.610367	NA	NA	4.64475
imm_16_74041307	0.936711	0.0718656	-0.0437685	1.20306e-06	0.608572	NA	NA	4.46399
rs117261313	-13.3872	0.0719491	-0.7324	6.46594e-06	0.519084	NA	NA	5.18713
rs145868200	-13.3872	0.0719491	-0.7324	6.46594e-06	0.519084	NA	NA	5.18713
rs139895115	-13.3891	0.0721929	-0.720732	6.63115e-06	0.526164	NA	NA	5.10802
rs150476682	-13.3631	0.0725491	-0.753173	6.48522e-06	0.507622	NA	NA	5.33548
rs184384228	-18.6906	0.0735519	-1.83745	2.1452e-06	0.414852	4.27765e-06	0.862286	8.95092
imm_16_73975421	0.939972	0.0735646	-0.0479377	6.26874e-07	0.588341	NA	NA	4.85244
rs117830285	-10.9975	0.073783	-0.973161	1.12442e-05	0.288109	NA	NA	8.12957
rs77536728	-9.32913	0.0743265	-0.76267	1.69126e-06	0.428715	3.89671e-06	0.983074	7.55733
imm_16_73953278	0.939495	0.0748626	-0.0472176	3.88023e-07	0.60201	NA	NA	4.78535
imm_16_73963380	0.942824	0.074974	-0.0440206	1.08218e-06	0.614848	NA	NA	4.46074
imm_16_73894180	0.931379	0.0758958	-0.0451487	7.39683e-07	0.607324	NA	NA	4.62339
rs56071233.COSV59894748.COSV60371613	-18.5827	0.0760765	-1.74567	2.2273e-06	0.405242	4.33029e-06	0.908722	8.58736
imm_16_74001317	0.930856	0.0765159	-0.0450976	3.84938e-07	0.617261	NA	NA	4.62087
imm_16_73972842	0.929773	0.0773172	-0.051938	1.32533e-06	0.547814	NA	NA	5.29055
rs78779956	-18.5187	0.0773542	-1.9612	1.85754e-06	0.430699	6.54553e-06	0.781836	9.57625
rs144036672	-18.483	0.0774989	-1.94791	2.28255e-06	0.391032	6.12665e-06	0.838421	9.5341
rs149181623	-18.5084	0.0775784	-1.51107	2.40722e-06	0.511275	6.30812e-06	0.869307	7.54803
imm_16_73988310	0.92839	0.0777849	-0.0394084	9.04079e-07	0.652983	NA	NA	4.07196
imm_16_74011905	0.926727	0.0782212	-0.0431661	3.88368e-07	0.63275	NA	NA	4.4506
rs76377725	-18.4431	0.0784139	-1.86486	2.36644e-06	0.365155	4.98267e-06	0.916103	9.18289
rs139634219	-18.4312	0.0784494	-1.88176	2.65513e-06	0.396982	5.82873e-06	0.854793	9.26383
rs148681403	-18.3462	0.0785257	-1.85777	2.29482e-06	0.454291	6.04741e-06	0.785184	9.19506
rs535474272	-3.16495	0.078539	-0.258314	4.55582e-06	0.356809	NA	NA	7.54584
imm_16_73990575	0.92653	0.0786269	-0.0501289	3.85729e-07	0.579477	NA	NA	5.13269
rs147531075	-18.3695	0.0786488	-1.83612	2.35077e-06	0.422334	5.96686e-06	0.838787	9.08718
rs137938953	-18.3329	0.0788651	-2.19759	2.78138e-06	0.353679	6.47988e-06	0.775089	10.704
rs141906400	-18.3675	0.0788673	-1.73287	2.34811e-06	0.436532	6.21497e-06	0.864747	8.62108
rs117876812	-18.3675	0.0788673	-1.73287	2.34811e-06	0.436532	6.21497e-06	0.864747	8.62108
imm_16_74008671	0.926323	0.0788988	-0.0466114	4.2406e-07	0.605346	NA	NA	4.79081
imm_16_73985598	0.925214	0.0789396	-0.0468892	3.75727e-07	0.604227	NA	NA	4.82348
imm_16_73985807	0.925214	0.0789396	-0.0468892	3.75727e-07	0.604227	NA	NA	4.82348
imm_16_73995970	0.925214	0.0789396	-0.0468892	3.75727e-07	0.604227	NA	NA	4.82348
imm_16_73999861	0.925214	0.0789396	-0.0468892	3.75727e-07	0.604227	NA	NA	4.82348
imm_16_74007540	0.925214	0.0789396	-0.0468892	3.75727e-07	0.604227	NA	NA	4.82348
imm_16_73989331	0.925675	0.0789594	-0.0475826	3.79727e-07	0.599165	NA	NA	4.889
rs75067820	-18.4383	0.0789731	-1.80936	2.31282e-06	0.432133	6.46835e-06	0.845284	8.93615
imm_16_73958614	0.939568	0.0789974	-0.0248858	7.8723e-07	0.788513	NA	NA	2.5803
rs143972585	-18.376	0.0792432	-1.78074	2.31442e-06	0.446047	6.34831e-06	0.833003	8.83449
rs76887459	-18.257	0.0793187	-1.86975	2.344e-06	0.456043	6.45832e-06	0.775549	9.28988
rs187863221	-18.3925	0.0793197	-1.70727	2.5305e-06	0.425272	6.12926e-06	0.89443	8.49398
rs56173940	-2.45585	0.0793438	0.176776	1.16059e-06	0.445161	NA	NA	6.71481
rs148734707	-18.3927	0.0794153	-1.8324	2.89957e-06	0.409363	4.90158e-06	0.859049	9.06004
rs184593433	-18.3748	0.0795015	-1.92198	2.71269e-06	0.395083	6.09466e-06	0.840163	9.46935
rs188669982	-9.14229	0.0795867	-0.964731	2.43524e-06	0.383409	6.18834e-06	0.85239	9.54516
rs75535700	-18.3094	0.0797457	-1.85568	2.36864e-06	0.421477	6.29269e-06	0.831197	9.20245
rs55691845	-18.3322	0.0797779	-2.00245	3.0467e-06	0.430759	6.59253e-06	0.749675	9.84747
rs150113374	-18.3465	0.079804	-1.94793	2.35395e-06	0.439246	6.92502e-06	0.768439	9.59831
rs117742494	-18.2703	0.0798158	-2.17671	2.63341e-06	0.372338	6.5126e-06	0.756515	10.6456
rs186141507	-18.3495	0.0799992	-1.79805	2.27716e-06	0.455522	6.46256e-06	0.814156	8.92442
imm_16_73973276	0.918886	0.080167	-0.0449318	7.43495e-07	0.609494	NA	NA	4.66186
rs76563030	-18.3221	0.080185	-1.79989	2.19009e-06	0.456581	6.30616e-06	0.811608	8.94489
rs140644633	-18.2973	0.0803083	-1.84434	2.33393e-06	0.42871	6.2684e-06	0.827376	9.15685
COSV52209447	0.922572	0.0803945	-0.046579	5.62451e-07	0.602094	NA	NA	4.80617
rs150043005	-18.297	0.0805869	-1.80733	2.39431e-06	0.442148	6.11749e-06	0.826215	8.98978
rs186310727	-18.2622	0.0806576	-1.94032	2.39284e-06	0.414787	6.38682e-06	0.80332	9.60435
rs191689936	-18.2693	0.0807848	-1.84402	2.46756e-06	0.42976	6.54968e-06	0.825232	9.16813
rs117121599	-18.2492	0.0808685	-1.91186	2.37387e-06	0.427751	6.35037e-06	0.797992	9.48294
rs147493050.COSV50014553	-18.2827	0.080924	-1.82582	2.5014e-06	0.427927	6.57294e-06	0.837328	9.07985
rs150966442	-18.2683	0.0809675	-1.8636	2.3055e-06	0.419417	6.13284e-06	0.832673	9.25697
rs74727805	-18.2592	0.0811064	-1.874	2.33835e-06	0.416679	6.18876e-06	0.831651	9.30803
rs9552960	-18.2537	0.0811308	-1.85667	2.35537e-06	0.443125	6.46562e-06	0.803518	9.23239
rs11568551	-18.2588	0.0811744	-1.90357	2.2854e-06	0.399042	5.85785e-06	0.844491	9.4412
rs61422983	-18.2533	0.081177	-1.907	2.31639e-06	0.426284	6.42477e-06	0.804048	9.45921
rs200839338	-18.2555	0.0811795	-1.87534	2.36295e-06	0.410401	6.06571e-06	0.840011	9.31577
rs141397086	-18.2342	0.0812094	-1.91574	2.38987e-06	0.408545	6.33079e-06	0.8234	9.50743
rs149091338	-18.2747	0.0812602	-1.9723	2.47853e-06	0.374582	6.21027e-06	0.85305	9.74122
rs117008532	-18.2461	0.0813387	-1.88208	2.31207e-06	0.421356	6.28209e-06	0.821828	9.35047
imm_16_74006677	0.919613	0.0813454	-0.0465652	4.03814e-07	0.606455	NA	NA	4.81953
rs142524381	-18.2462	0.0814306	-1.88675	2.33854e-06	0.407905	4.82207e-06	0.841271	9.37147
rs75717538	-18.2462	0.0814306	-1.88675	2.33854e-06	0.407905	4.82207e-06	0.841271	9.37147
rs117426093	-18.2312	0.0814691	-1.88795	2.3875e-06	0.406391	6.28947e-06	0.839507	9.38383
rs144911751	-18.2483	0.081482	-1.88949	2.38417e-06	0.415332	6.29962e-06	0.827205	9.38279
rs41299438	-18.2483	0.081482	-1.88949	2.38417e-06	0.415332	6.29962e-06	0.827205	9.38279
rs192527985	-18.227	0.0815283	-1.92807	2.39776e-06	0.415566	6.41761e-06	0.809104	9.56619
rs149234190	-18.2315	0.0815511	-1.89439	2.35656e-06	0.421262	6.33269e-06	0.816034	9.4127
rs80185227	-18.2293	0.0815649	-1.90416	2.38188e-06	0.413402	6.32474e-06	0.822426	9.45767
rs8082814	-3.08506	0.0815733	0.226447	6.31865e-07	0.450994	NA	NA	6.83819
rs143151647	-18.2241	0.0816088	-1.86788	2.38497e-06	0.428762	6.34223e-06	0.816616	9.29664
rs76009440	-18.2222	0.0816098	-1.89541	2.37747e-06	0.423118	6.32906e-06	0.812457	9.42163
rs11576002	-18.2274	0.0816177	-1.84981	2.40901e-06	0.42708	6.43785e-06	0.82716	9.2135
rs12616529	-18.0696	0.0816288	-1.94037	2.35419e-06	0.454685	6.41852e-06	0.744647	9.69703
rs117574481	-18.2755	0.0816904	-1.92601	2.79679e-06	0.336032	6.09725e-06	0.933644	9.53397
rs148857836	-18.2198	0.0817317	-1.83918	2.45337e-06	0.426089	6.49541e-06	0.831716	9.16889
rs117026171	-18.2077	0.0817415	-1.91921	2.3847e-06	0.420373	6.32824e-06	0.805439	9.53556
rs147866708	-18.2301	0.0817588	-1.88407	2.40413e-06	0.416872	6.21603e-06	0.827138	9.36689
rs184867391	-18.2161	0.0817622	-1.90212	2.37733e-06	0.421902	6.32653e-06	0.811391	9.45474
rs141195786	-18.215	0.0818469	-1.90198	2.38652e-06	0.405501	6.27248e-06	0.835057	9.45458
rs145504401	-18.215	0.0818469	-1.90198	2.38652e-06	0.405501	6.27248e-06	0.835057	9.45458
rs185644300	-18.2158	0.0818486	-1.90046	2.38175e-06	0.413561	6.32095e-06	0.823965	9.4474
rs138017670	-18.2157	0.0818626	-1.8998	2.36946e-06	0.403121	6.03231e-06	0.841147	9.44446
rs117935213	-9.10241	0.0818771	-0.955175	2.3557e-06	0.411181	6.25172e-06	0.822522	9.49706
rs181280920	-9.10241	0.0818771	-0.955175	2.3557e-06	0.411181	6.25172e-06	0.822522	9.49706
rs140522028	-9.10241	0.0818771	-0.955175	2.3557e-06	0.411181	6.25172e-06	0.822522	9.49706
rs181142071.COSV64861078.COSV64862661	-18.2048	0.0818771	-1.91035	2.3557e-06	0.411181	6.25172e-06	0.822522	9.49706
rs4292924	-18.2048	0.0818771	-1.91035	2.3557e-06	0.411181	6.25172e-06	0.822522	9.49706
rs77317573	-18.2048	0.0818771	-1.91035	2.3557e-06	0.411181	6.25172e-06	0.822522	9.49706
rs200567044	-18.2048	0.0818771	-1.91035	2.3557e-06	0.411181	6.25172e-06	0.822522	9.49706
rs142598707	-18.2048	0.0818771	-1.91035	2.3557e-06	0.411181	6.25172e-06	0.822522	9.49706
rs201041009	-18.2048	0.0818771	-1.91035	2.3557e-06	0.411181	6.25172e-06	0.822522	9.49706
rs201172117	-18.2048	0.0818771	-1.91035	2.3557e-06	0.411181	6.25172e-06	0.822522	9.49706
rs190431418	-18.2048	0.0818771	-1.91035	2.3557e-06	0.411181	6.25172e-06	0.822522	9.49706
rs77827945	-18.2048	0.0818771	-1.91035	2.3557e-06	0.411181	6.25172e-06	0.822522	9.49706
rs144503839	-18.2048	0.0818771	-1.91035	2.3557e-06	0.411181	6.25172e-06	0.822522	9.49706
rs77599424	-18.2048	0.0818771	-1.91035	2.3557e-06	0.411181	6.25172e-06	0.822522	9.49706
rs201729184	-18.2048	0.0818771	-1.91035	2.3557e-06	0.411181	6.25172e-06	0.822522	9.49706
rs79007764	-18.2048	0.0818771	-1.91035	2.3557e-06	0.411181	6.25172e-06	0.822522	9.49706
rs182566496.COSV63121351	-18.2048	0.0818771	-1.91035	2.3557e-06	0.411181	6.25172e-06	0.822522	9.49706
rs74953085.COSV99609448	-18.2048	0.0818771	-1.91035	2.3557e-06	0.411181	6.25172e-06	0.822522	9.49706
rs143595907.COSV60739243	-18.2048	0.0818771	-1.91035	2.3557e-06	0.411181	6.25172e-06	0.822522	9.49706
rs144676974.COSV52969184	-18.2048	0.0818771	-1.91035	2.3557e-06	0.411181	6.25172e-06	0.822522	9.49706
rs118167062	-18.2048	0.0818771	-1.91035	2.3557e-06	0.411181	6.25172e-06	0.822522	9.49706
rs148899322	-18.2048	0.0818771	-1.91035	2.3557e-06	0.411181	6.25172e-06	0.822522	9.49706
rs75112076	-18.2048	0.0818771	-1.91035	2.3557e-06	0.411181	6.25172e-06	0.822522	9.49706
rs117413433	-18.2048	0.0818771	-1.91035	2.3557e-06	0.411181	6.25172e-06	0.822522	9.49706
rs182564806	-18.2048	0.0818771	-1.91035	2.3557e-06	0.411181	6.25172e-06	0.822522	9.49706
rs79237112	-18.2048	0.0818771	-1.91035	2.3557e-06	0.411181	6.25172e-06	0.822522	9.49706
rs117085377	-18.2048	0.0818771	-1.91035	2.3557e-06	0.411181	6.25172e-06	0.822522	9.49706
rs74333008	-18.2048	0.0818771	-1.91035	2.3557e-06	0.411181	6.25172e-06	0.822522	9.49706
rs118128212	-18.2048	0.0818771	-1.91035	2.3557e-06	0.411181	6.25172e-06	0.822522	9.49706
rs140547244	-18.2048	0.0818771	-1.91035	2.3557e-06	0.411181	6.25172e-06	0.822522	9.49706
rs141553115	-18.2048	0.0818771	-1.91035	2.3557e-06	0.411181	6.25172e-06	0.822522	9.49706
rs373883681	-18.2048	0.0818771	-1.91035	2.3557e-06	0.411181	6.25172e-06	0.822522	9.49706
rs183686803	-18.2048	0.0818771	-1.91035	2.3557e-06	0.411181	6.25172e-06	0.822522	9.49706
rs75334178	-18.2048	0.0818771	-1.91035	2.3557e-06	0.411181	6.25172e-06	0.822522	9.49706
rs146138781	-18.2048	0.0818771	-1.91035	2.3557e-06	0.411181	6.25172e-06	0.822522	9.49706
rs182745218	-18.2048	0.0818771	-1.91035	2.3557e-06	0.411181	6.25172e-06	0.822522	9.49706
rs183961685	-18.2048	0.0818771	-1.91035	2.3557e-06	0.411181	6.25172e-06	0.822522	9.49706
rs117665794	-18.2048	0.0818771	-1.91035	2.3557e-06	0.411181	6.25172e-06	0.822522	9.49706
rs12616529.1	-18.2048	0.0818771	-1.91035	2.3557e-06	0.411181	6.25172e-06	0.822522	9.49706
rs145285676	-18.2048	0.0818771	-1.91035	2.3557e-06	0.411181	6.25172e-06	0.822522	9.49706
rs76455076.COSV71375001	-18.2048	0.0818771	-1.91035	2.3557e-06	0.411181	6.25172e-06	0.822522	9.49706
rs199998986.COSV57492773	-18.2048	0.0818771	-1.91035	2.3557e-06	0.411181	6.25172e-06	0.822522	9.49706
rs75460542	-18.2048	0.0818771	-1.91035	2.3557e-06	0.411181	6.25172e-06	0.822522	9.49706
rs141981259	-18.2048	0.0818771	-1.91035	2.3557e-06	0.411181	6.25172e-06	0.822522	9.49706
rs79396968	-18.2048	0.0818771	-1.91035	2.3557e-06	0.411181	6.25172e-06	0.822522	9.49706
rs138029084	-18.2048	0.0818771	-1.91035	2.3557e-06	0.411181	6.25172e-06	0.822522	9.49706
rs145942849	-18.2048	0.0818771	-1.91035	2.3557e-06	0.411181	6.25172e-06	0.822522	9.49706
rs140048660	-18.2048	0.0818771	-1.91035	2.3557e-06	0.411181	6.25172e-06	0.822522	9.49706
rs78769695	-18.2048	0.0818771	-1.91035	2.3557e-06	0.411181	6.25172e-06	0.822522	9.49706
rs74323520	-18.2048	0.0818771	-1.91035	2.3557e-06	0.411181	6.25172e-06	0.822522	9.49706
rs77410040	-18.2048	0.0818771	-1.91035	2.3557e-06	0.411181	6.25172e-06	0.822522	9.49706
rs77776626	-18.2048	0.0818771	-1.91035	2.3557e-06	0.411181	6.25172e-06	0.822522	9.49706
rs55944080.COSV51420832	-18.2048	0.0818771	-1.91035	2.3557e-06	0.411181	6.25172e-06	0.822522	9.49706
rs147394705	-18.2048	0.0818771	-1.91035	2.3557e-06	0.411181	6.25172e-06	0.822522	9.49706
rs151269764	-18.2048	0.0818771	-1.91035	2.3557e-06	0.411181	6.25172e-06	0.822522	9.49706
rs201448153.COSV59509600.COSV59509654	-18.2048	0.0818771	-1.91035	2.3557e-06	0.411181	6.25172e-06	0.822522	9.49706
rs147928934	-18.2048	0.0818771	-1.91035	2.3557e-06	0.411181	6.25172e-06	0.822522	9.49706
rs146637751	-18.2048	0.0818771	-1.91035	2.3557e-06	0.411181	6.25172e-06	0.822522	9.49706
rs143727777	-18.2048	0.0818771	-1.91035	2.3557e-06	0.411181	6.25172e-06	0.822522	9.49706
rs80090047	-18.2048	0.0818771	-1.91035	2.3557e-06	0.411181	6.25172e-06	0.822522	9.49706
rs149935322	-18.2048	0.0818771	-1.91035	2.3557e-06	0.411181	6.25172e-06	0.822522	9.49706
rs76323370	-18.2048	0.0818771	-1.91035	2.3557e-06	0.411181	6.25172e-06	0.822522	9.49706
rs201455234	-18.2048	0.0818771	-1.91035	2.3557e-06	0.411181	6.25172e-06	0.822522	9.49706
rs192130640	-18.2048	0.0818771	-1.91035	2.3557e-06	0.411181	6.25172e-06	0.822522	9.49706
rs77068413	-18.2048	0.0818771	-1.91035	2.3557e-06	0.411181	6.25172e-06	0.822522	9.49706
rs76983277	-18.2048	0.0818771	-1.91035	2.3557e-06	0.411181	6.25172e-06	0.822522	9.49706
rs140374255	-18.2048	0.0818771	-1.91035	2.3557e-06	0.411181	6.25172e-06	0.822522	9.49706
rs79012420	-18.2048	0.0818771	-1.91035	2.3557e-06	0.411181	6.25172e-06	0.822522	9.49706
rs144738175	-18.2048	0.0818771	-1.91035	2.3557e-06	0.411181	6.25172e-06	0.822522	9.49706
rs142272086	-18.2048	0.0818771	-1.91035	2.3557e-06	0.411181	6.25172e-06	0.822522	9.49706
rs77247585	-18.2048	0.0818771	-1.91035	2.3557e-06	0.411181	6.25172e-06	0.822522	9.49706
rs200773812.COSV55788901	-18.2048	0.0818771	-1.91035	2.3557e-06	0.411181	6.25172e-06	0.822522	9.49706
rs144418856	-18.2048	0.0818771	-1.91035	2.3557e-06	0.411181	6.25172e-06	0.822522	9.49706
rs143766660	-18.2048	0.0818771	-1.91035	2.3557e-06	0.411181	6.25172e-06	0.822522	9.49706
rs149138836	-18.2048	0.0818771	-1.91035	2.3557e-06	0.411181	6.25172e-06	0.822522	9.49706
rs150102589	-18.2048	0.0818771	-1.91035	2.3557e-06	0.411181	6.25172e-06	0.822522	9.49706
rs77295369	-18.2048	0.0818771	-1.91035	2.3557e-06	0.411181	6.25172e-06	0.822522	9.49706
rs139345209	-18.2048	0.0818771	-1.91035	2.3557e-06	0.411181	6.25172e-06	0.822522	9.49706
rs140133635	-18.2048	0.0818771	-1.91035	2.3557e-06	0.411181	6.25172e-06	0.822522	9.49706
rs74758811	-18.2048	0.0818771	-1.91035	2.3557e-06	0.411181	6.25172e-06	0.822522	9.49706
rs188215829	-18.2048	0.0818771	-1.91035	2.3557e-06	0.411181	6.25172e-06	0.822522	9.49706
Variant13197	-18.2048	0.0818771	-1.91035	2.3557e-06	0.411181	6.25172e-06	0.822522	9.49706
rs141590348	-18.2048	0.0818771	-1.91035	2.3557e-06	0.411181	6.25172e-06	0.822522	9.49706
rs150126545	-18.2048	0.0818771	-1.91035	2.3557e-06	0.411181	6.25172e-06	0.822522	9.49706
rs145282515	-18.2048	0.0818771	-1.91035	2.3557e-06	0.411181	6.25172e-06	0.822522	9.49706
rs190167587	-18.2048	0.0818771	-1.91035	2.3557e-06	0.411181	6.25172e-06	0.822522	9.49706
rs143811334	-18.2048	0.0818771	-1.91035	2.3557e-06	0.411181	6.25172e-06	0.822522	9.49706
rs118181921	-18.2048	0.0818771	-1.91035	2.3557e-06	0.411181	6.25172e-06	0.822522	9.49706
rs145940614	-18.2048	0.0818771	-1.91035	2.3557e-06	0.411181	6.25172e-06	0.822522	9.49706
rs146195485	-18.2048	0.0818771	-1.91035	2.3557e-06	0.411181	6.25172e-06	0.822522	9.49706
rs117103332	-18.2048	0.0818771	-1.91035	2.3557e-06	0.411181	6.25172e-06	0.822522	9.49706
rs188760100	-18.2048	0.0818771	-1.91035	2.3557e-06	0.411181	6.25172e-06	0.822522	9.49706
rs140894340	-18.2048	0.0818771	-1.91035	2.3557e-06	0.411181	6.25172e-06	0.822522	9.49706
rs117105033	-18.2048	0.0818771	-1.91035	2.3557e-06	0.411181	6.25172e-06	0.822522	9.49706
rs78577254	-18.2048	0.0818771	-1.91035	2.3557e-06	0.411181	6.25172e-06	0.822522	9.49706
rs181047361	-18.2048	0.0818771	-1.91035	2.3557e-06	0.411181	6.25172e-06	0.822522	9.49706
rs756274300	-18.2048	0.0818771	-1.91035	2.3557e-06	0.411181	6.25172e-06	0.822522	9.49706
rs138294595	-18.2048	0.0818771	-1.91035	2.3557e-06	0.411181	6.25172e-06	0.822522	9.49706
rs80017634	-18.2048	0.0818771	-1.91035	2.3557e-06	0.411181	6.25172e-06	0.822522	9.49706
rs117530837	-18.2048	0.0818771	-1.91035	2.3557e-06	0.411181	6.25172e-06	0.822522	9.49706
rs148624022	-18.2048	0.0818771	-1.91035	2.3557e-06	0.411181	6.25172e-06	0.822522	9.49706
rs144570135	-18.2048	0.0818771	-1.91035	2.3557e-06	0.411181	6.25172e-06	0.822522	9.49706
rs76125754	-18.2048	0.0818771	-1.91035	2.3557e-06	0.411181	6.25172e-06	0.822522	9.49706
rs185649024	-18.2048	0.0818771	-1.91035	2.3557e-06	0.411181	6.25172e-06	0.822522	9.49706
rs150765053	-18.2048	0.0818771	-1.91035	2.3557e-06	0.411181	6.25172e-06	0.822522	9.49706
rs189426448	-18.2048	0.0818771	-1.91035	2.3557e-06	0.411181	6.25172e-06	0.822522	9.49706
rs147128577	-18.2048	0.0818771	-1.91035	2.3557e-06	0.411181	6.25172e-06	0.822522	9.49706
rs180778692	-18.2048	0.0818771	-1.91035	2.3557e-06	0.411181	6.25172e-06	0.822522	9.49706
rs74551351	-18.2048	0.0818771	-1.91035	2.3557e-06	0.411181	6.25172e-06	0.822522	9.49706
rs149727107	-18.2048	0.0818771	-1.91035	2.3557e-06	0.411181	6.25172e-06	0.822522	9.49706
rs118143777	-18.2048	0.0818771	-1.91035	2.3557e-06	0.411181	6.25172e-06	0.822522	9.49706
rs75137689	-18.2048	0.0818771	-1.91035	2.3557e-06	0.411181	6.25172e-06	0.822522	9.49706
rs149979103	-18.2048	0.0818771	-1.91035	2.3557e-06	0.411181	6.25172e-06	0.822522	9.49706
rs117277536	-18.2048	0.0818771	-1.91035	2.3557e-06	0.411181	6.25172e-06	0.822522	9.49706
rs117260329	-18.2048	0.0818771	-1.91035	2.3557e-06	0.411181	6.25172e-06	0.822522	9.49706
rs142274336	-18.2048	0.0818771	-1.91035	2.3557e-06	0.411181	6.25172e-06	0.822522	9.49706
rs143487881	-18.2048	0.0818771	-1.91035	2.3557e-06	0.411181	6.25172e-06	0.822522	9.49706
rs140363477.COSV100236629	-18.2048	0.0818771	-1.91035	2.3557e-06	0.411181	6.25172e-06	0.822522	9.49706
rs74854406	-18.2048	0.0818771	-1.91035	2.3557e-06	0.411181	6.25172e-06	0.822522	9.49706
rs117375884	-18.2048	0.0818771	-1.91035	2.3557e-06	0.411181	6.25172e-06	0.822522	9.49706
rs149508674	-18.2048	0.0818771	-1.91035	2.3557e-06	0.411181	6.25172e-06	0.822522	9.49706
rs151209421	-18.2048	0.0818771	-1.91035	2.3557e-06	0.411181	6.25172e-06	0.822522	9.49706
rs146453380	-18.2048	0.0818771	-1.91035	2.3557e-06	0.411181	6.25172e-06	0.822522	9.49706
rs78744268	-18.2048	0.0818771	-1.91035	2.3557e-06	0.411181	6.25172e-06	0.822522	9.49706
rs185957068	-18.2048	0.0818771	-1.91035	2.3557e-06	0.411181	6.25172e-06	0.822522	9.49706
rs117079685.COSV55929558	-18.2048	0.0818771	-1.91035	2.3557e-06	0.411181	6.25172e-06	0.822522	9.49706
rs145142382	-18.2048	0.0818771	-1.91035	2.3557e-06	0.411181	6.25172e-06	0.822522	9.49706
rs180815385	-18.2048	0.0818771	-1.91035	2.3557e-06	0.411181	6.25172e-06	0.822522	9.49706
rs148896862	-18.2048	0.0818771	-1.91035	2.3557e-06	0.411181	6.25172e-06	0.822522	9.49706
rs139842311	-18.2048	0.0818771	-1.91035	2.3557e-06	0.411181	6.25172e-06	0.822522	9.49706
rs75765505	-18.2048	0.0818771	-1.91035	2.3557e-06	0.411181	6.25172e-06	0.822522	9.49706
rs191798259	-18.2048	0.0818771	-1.91035	2.3557e-06	0.411181	6.25172e-06	0.822522	9.49706
rs118153056	-18.2048	0.0818771	-1.91035	2.3557e-06	0.411181	6.25172e-06	0.822522	9.49706
rs147615414	-18.2048	0.0818771	-1.91035	2.3557e-06	0.411181	6.25172e-06	0.822522	9.49706
rs149651310	-18.2048	0.0818771	-1.91035	2.3557e-06	0.411181	6.25172e-06	0.822522	9.49706
rs141307320	-18.2048	0.0818771	-1.91035	2.3557e-06	0.411181	6.25172e-06	0.822522	9.49706
rs117799556	-18.2048	0.0818771	-1.91035	2.3557e-06	0.411181	6.25172e-06	0.822522	9.49706
rs150315968	-18.2048	0.0818771	-1.91035	2.3557e-06	0.411181	6.25172e-06	0.822522	9.49706
rs138441090	-18.2048	0.0818771	-1.91035	2.3557e-06	0.411181	6.25172e-06	0.822522	9.49706
rs151109103	-18.2048	0.0818771	-1.91035	2.3557e-06	0.411181	6.25172e-06	0.822522	9.49706
rs75370842	-18.2048	0.0818771	-1.91035	2.3557e-06	0.411181	6.25172e-06	0.822522	9.49706
rs148227650	-18.2048	0.0818771	-1.91035	2.3557e-06	0.411181	6.25172e-06	0.822522	9.49706
rs139712737	-18.2048	0.0818771	-1.91035	2.3557e-06	0.411181	6.25172e-06	0.822522	9.49706
rs150642862	-18.2048	0.0818771	-1.91035	2.3557e-06	0.411181	6.25172e-06	0.822522	9.49706
rs77779332	-18.2048	0.0818771	-1.91035	2.3557e-06	0.411181	6.25172e-06	0.822522	9.49706
rs144469428	-18.2048	0.0818771	-1.91035	2.3557e-06	0.411181	6.25172e-06	0.822522	9.49706
rs11140726	-18.2048	0.0818771	-1.91035	2.3557e-06	0.411181	6.25172e-06	0.822522	9.49706
rs147137710	-18.2048	0.0818771	-1.91035	2.3557e-06	0.411181	6.25172e-06	0.822522	9.49706
rs117425040	-18.2048	0.0818771	-1.91035	2.3557e-06	0.411181	6.25172e-06	0.822522	9.49706
rs142477634	-18.2048	0.0818771	-1.91035	2.3557e-06	0.411181	6.25172e-06	0.822522	9.49706
rs144783598	-18.2048	0.0818771	-1.91035	2.3557e-06	0.411181	6.25172e-06	0.822522	9.49706
rs190411748	-18.2048	0.0818771	-1.91035	2.3557e-06	0.411181	6.25172e-06	0.822522	9.49706
rs79248107	-18.2048	0.0818771	-1.91035	2.3557e-06	0.411181	6.25172e-06	0.822522	9.49706
rs143950062	-18.2048	0.0818771	-1.91035	2.3557e-06	0.411181	6.25172e-06	0.822522	9.49706
rs76987497	-18.2048	0.0818771	-1.91035	2.3557e-06	0.411181	6.25172e-06	0.822522	9.49706
rs118011773	-18.2048	0.0818771	-1.91035	2.3557e-06	0.411181	6.25172e-06	0.822522	9.49706
rs144160411	-18.2048	0.0818771	-1.91035	2.3557e-06	0.411181	6.25172e-06	0.822522	9.49706
rs116922701	-18.2048	0.0818771	-1.91035	2.3557e-06	0.411181	6.25172e-06	0.822522	9.49706
rs56220353.CM045738.COSV64986786	-18.2048	0.0818771	-1.91035	2.3557e-06	0.411181	6.25172e-06	0.822522	9.49706
rs56220353.CM045738.COSV64986786.1	-18.2048	0.0818771	-1.91035	2.3557e-06	0.411181	6.25172e-06	0.822522	9.49706
rs150444603	-18.2048	0.0818771	-1.91035	2.3557e-06	0.411181	6.25172e-06	0.822522	9.49706
rs142798585	-18.2048	0.0818771	-1.91035	2.3557e-06	0.411181	6.25172e-06	0.822522	9.49706
rs143952224	-18.2048	0.0818771	-1.91035	2.3557e-06	0.411181	6.25172e-06	0.822522	9.49706
rs137867894	-18.2048	0.0818771	-1.91035	2.3557e-06	0.411181	6.25172e-06	0.822522	9.49706
rs77046859	-18.2048	0.0818771	-1.91035	2.3557e-06	0.411181	6.25172e-06	0.822522	9.49706
rs146728148	-18.2048	0.0818771	-1.91035	2.3557e-06	0.411181	6.25172e-06	0.822522	9.49706
rs142137211	-18.2048	0.0818771	-1.91035	2.3557e-06	0.411181	6.25172e-06	0.822522	9.49706
rs151136181	-18.2048	0.0818771	-1.91035	2.3557e-06	0.411181	6.25172e-06	0.822522	9.49706
rs7130798	-18.2048	0.0818771	-1.91035	2.3557e-06	0.411181	6.25172e-06	0.822522	9.49706
rs77991263	-18.2048	0.0818771	-1.91035	2.3557e-06	0.411181	6.25172e-06	0.822522	9.49706
rs146219330	-18.2048	0.0818771	-1.91035	2.3557e-06	0.411181	6.25172e-06	0.822522	9.49706
rs117186901	-18.2048	0.0818771	-1.91035	2.3557e-06	0.411181	6.25172e-06	0.822522	9.49706
rs149502247	-18.2048	0.0818771	-1.91035	2.3557e-06	0.411181	6.25172e-06	0.822522	9.49706
rs192998156	-18.2048	0.0818771	-1.91035	2.3557e-06	0.411181	6.25172e-06	0.822522	9.49706
rs187343931	-18.2048	0.0818771	-1.91035	2.3557e-06	0.411181	6.25172e-06	0.822522	9.49706
rs192586242.COSV100265713	-18.2048	0.0818771	-1.91035	2.3557e-06	0.411181	6.25172e-06	0.822522	9.49706
rs144093062	-18.2048	0.0818771	-1.91035	2.3557e-06	0.411181	6.25172e-06	0.822522	9.49706
rs144723667	-18.2048	0.0818771	-1.91035	2.3557e-06	0.411181	6.25172e-06	0.822522	9.49706
rs117997280	-18.2048	0.0818771	-1.91035	2.3557e-06	0.411181	6.25172e-06	0.822522	9.49706
rs147509777	-18.2048	0.0818771	-1.91035	2.3557e-06	0.411181	6.25172e-06	0.822522	9.49706
rs11568551.1	-18.2048	0.0818771	-1.91035	2.3557e-06	0.411181	6.25172e-06	0.822522	9.49706
rs148233198	-18.2048	0.0818771	-1.91035	2.3557e-06	0.411181	6.25172e-06	0.822522	9.49706
rs74979900	-18.2048	0.0818771	-1.91035	2.3557e-06	0.411181	6.25172e-06	0.822522	9.49706
rs142816804	-18.2048	0.0818771	-1.91035	2.3557e-06	0.411181	6.25172e-06	0.822522	9.49706
rs149349524	-18.2048	0.0818771	-1.91035	2.3557e-06	0.411181	6.25172e-06	0.822522	9.49706
rs17483502	-18.2048	0.0818771	-1.91035	2.3557e-06	0.411181	6.25172e-06	0.822522	9.49706
rs187666598	-18.2048	0.0818771	-1.91035	2.3557e-06	0.411181	6.25172e-06	0.822522	9.49706
rs151314243	-18.2048	0.0818771	-1.91035	2.3557e-06	0.411181	6.25172e-06	0.822522	9.49706
rs180744618	-18.2048	0.0818771	-1.91035	2.3557e-06	0.411181	6.25172e-06	0.822522	9.49706
rs78928914	-18.2048	0.0818771	-1.91035	2.3557e-06	0.411181	6.25172e-06	0.822522	9.49706
rs145719745	-18.2048	0.0818771	-1.91035	2.3557e-06	0.411181	6.25172e-06	0.822522	9.49706
rs138522332	-18.2048	0.0818771	-1.91035	2.3557e-06	0.411181	6.25172e-06	0.822522	9.49706
rs140372565.COSV57965275	-18.2048	0.0818771	-1.91035	2.3557e-06	0.411181	6.25172e-06	0.822522	9.49706
rs75308431.COSV59240455	-18.2048	0.0818771	-1.91035	2.3557e-06	0.411181	6.25172e-06	0.822522	9.49706
rs75308431.COSV59240455.1	-18.2048	0.0818771	-1.91035	2.3557e-06	0.411181	6.25172e-06	0.822522	9.49706
rs113125615.CM1618189.COSV57510955	-18.2048	0.0818771	-1.91035	2.3557e-06	0.411181	6.25172e-06	0.822522	9.49706
rs151149985	-18.2048	0.0818771	-1.91035	2.3557e-06	0.411181	6.25172e-06	0.822522	9.49706
rs187801483	-18.2048	0.0818771	-1.91035	2.3557e-06	0.411181	6.25172e-06	0.822522	9.49706
rs139236309	-18.2048	0.0818771	-1.91035	2.3557e-06	0.411181	6.25172e-06	0.822522	9.49706
rs150455908	-18.2048	0.0818771	-1.91035	2.3557e-06	0.411181	6.25172e-06	0.822522	9.49706
rs78821196	-18.2048	0.0818771	-1.91035	2.3557e-06	0.411181	6.25172e-06	0.822522	9.49706
rs138251806	-18.2048	0.0818771	-1.91035	2.3557e-06	0.411181	6.25172e-06	0.822522	9.49706
rs75783783	-18.2048	0.0818771	-1.91035	2.3557e-06	0.411181	6.25172e-06	0.822522	9.49706
rs147223470	-18.2048	0.0818771	-1.91035	2.3557e-06	0.411181	6.25172e-06	0.822522	9.49706
rs1345092	-18.2048	0.0818771	-1.91035	2.3557e-06	0.411181	6.25172e-06	0.822522	9.49706
rs150217370	-18.2048	0.0818771	-1.91035	2.3557e-06	0.411181	6.25172e-06	0.822522	9.49706
rs74820648	-18.2048	0.0818771	-1.91035	2.3557e-06	0.411181	6.25172e-06	0.822522	9.49706
rs145985541	-18.2048	0.0818771	-1.91035	2.3557e-06	0.411181	6.25172e-06	0.822522	9.49706
rs149915751	-18.2048	0.0818771	-1.91035	2.3557e-06	0.411181	6.25172e-06	0.822522	9.49706
rs183328539	-18.2048	0.0818771	-1.91035	2.3557e-06	0.411181	6.25172e-06	0.822522	9.49706
rs117938586	-18.2048	0.0818771	-1.91035	2.3557e-06	0.411181	6.25172e-06	0.822522	9.49706
rs9568147	-18.2048	0.0818771	-1.91035	2.3557e-06	0.411181	6.25172e-06	0.822522	9.49706
rs149949253	-18.2048	0.0818771	-1.91035	2.3557e-06	0.411181	6.25172e-06	0.822522	9.49706
rs140358575	-18.2048	0.0818771	-1.91035	2.3557e-06	0.411181	6.25172e-06	0.822522	9.49706
rs144842247	-18.2048	0.0818771	-1.91035	2.3557e-06	0.411181	6.25172e-06	0.822522	9.49706
rs117068479	-18.2048	0.0818771	-1.91035	2.3557e-06	0.411181	6.25172e-06	0.822522	9.49706
rs191179599	-18.2048	0.0818771	-1.91035	2.3557e-06	0.411181	6.25172e-06	0.822522	9.49706
rs201686630	-18.2048	0.0818771	-1.91035	2.3557e-06	0.411181	6.25172e-06	0.822522	9.49706
rs76936836	-18.2048	0.0818771	-1.91035	2.3557e-06	0.411181	6.25172e-06	0.822522	9.49706
rs117114387	-18.2048	0.0818771	-1.91035	2.3557e-06	0.411181	6.25172e-06	0.822522	9.49706
rs138008369	-18.2048	0.0818771	-1.91035	2.3557e-06	0.411181	6.25172e-06	0.822522	9.49706
rs74576923	-18.2048	0.0818771	-1.91035	2.3557e-06	0.411181	6.25172e-06	0.822522	9.49706
rs79367070	-18.2048	0.0818771	-1.91035	2.3557e-06	0.411181	6.25172e-06	0.822522	9.49706
rs80274596	-18.2048	0.0818771	-1.91035	2.3557e-06	0.411181	6.25172e-06	0.822522	9.49706
rs184674278	-18.2048	0.0818771	-1.91035	2.3557e-06	0.411181	6.25172e-06	0.822522	9.49706
rs142952191	-18.2048	0.0818771	-1.91035	2.3557e-06	0.411181	6.25172e-06	0.822522	9.49706
rs75812946	-18.2048	0.0818771	-1.91035	2.3557e-06	0.411181	6.25172e-06	0.822522	9.49706
rs117850114	-18.2048	0.0818771	-1.91035	2.3557e-06	0.411181	6.25172e-06	0.822522	9.49706
rs79641633	-18.2048	0.0818771	-1.91035	2.3557e-06	0.411181	6.25172e-06	0.822522	9.49706
rs180939683	-18.2048	0.0818771	-1.91035	2.3557e-06	0.411181	6.25172e-06	0.822522	9.49706
rs79275026	-18.2048	0.0818771	-1.91035	2.3557e-06	0.411181	6.25172e-06	0.822522	9.49706
rs145526987	-18.2048	0.0818771	-1.91035	2.3557e-06	0.411181	6.25172e-06	0.822522	9.49706
rs116753155.COSV55012489	-18.2048	0.0818771	-1.91035	2.3557e-06	0.411181	6.25172e-06	0.822522	9.49706
rs151314215	-18.2048	0.0818771	-1.91035	2.3557e-06	0.411181	6.25172e-06	0.822522	9.49706
rs139573892	-18.2048	0.0818771	-1.91035	2.3557e-06	0.411181	6.25172e-06	0.822522	9.49706
rs200236506.COSV101237223	-18.2048	0.0818771	-1.91035	2.3557e-06	0.411181	6.25172e-06	0.822522	9.49706
rs182444420	-18.2048	0.0818771	-1.91035	2.3557e-06	0.411181	6.25172e-06	0.822522	9.49706
rs145654017	-18.2048	0.0818771	-1.91035	2.3557e-06	0.411181	6.25172e-06	0.822522	9.49706
rs186631004	-18.2048	0.0818771	-1.91035	2.3557e-06	0.411181	6.25172e-06	0.822522	9.49706
rs76067459	-18.2048	0.0818771	-1.91035	2.3557e-06	0.411181	6.25172e-06	0.822522	9.49706
rs184997830	-18.2048	0.0818771	-1.91035	2.3557e-06	0.411181	6.25172e-06	0.822522	9.49706
rs149140245	-18.2048	0.0818771	-1.91035	2.3557e-06	0.411181	6.25172e-06	0.822522	9.49706
rs138607085	-18.2048	0.0818771	-1.91035	2.3557e-06	0.411181	6.25172e-06	0.822522	9.49706
rs143784778	-18.2048	0.0818771	-1.91035	2.3557e-06	0.411181	6.25172e-06	0.822522	9.49706
rs189310554	-18.2048	0.0818771	-1.91035	2.3557e-06	0.411181	6.25172e-06	0.822522	9.49706
rs77374713	-18.2048	0.0818771	-1.91035	2.3557e-06	0.411181	6.25172e-06	0.822522	9.49706
rs117221568	-18.2048	0.0818771	-1.91035	2.3557e-06	0.411181	6.25172e-06	0.822522	9.49706
rs2303978	-18.2048	0.0818771	-1.91035	2.3557e-06	0.411181	6.25172e-06	0.822522	9.49706
rs148636563	-18.2048	0.0818771	-1.91035	2.3557e-06	0.411181	6.25172e-06	0.822522	9.49706
rs147903466	-18.2048	0.0818771	-1.91035	2.3557e-06	0.411181	6.25172e-06	0.822522	9.49706
rs79914366	-18.2048	0.0818771	-1.91035	2.3557e-06	0.411181	6.25172e-06	0.822522	9.49706
rs142909525	-18.2048	0.0818771	-1.91035	2.3557e-06	0.411181	6.25172e-06	0.822522	9.49706
rs150972124	-18.2048	0.0818771	-1.91035	2.3557e-06	0.411181	6.25172e-06	0.822522	9.49706
rs138013990	-18.2048	0.0818771	-1.91035	2.3557e-06	0.411181	6.25172e-06	0.822522	9.49706
rs2288901	-18.2048	0.0818771	-1.91035	2.3557e-06	0.411181	6.25172e-06	0.822522	9.49706
rs150155929	-18.2048	0.0818771	-1.91035	2.3557e-06	0.411181	6.25172e-06	0.822522	9.49706
rs80119825	-18.2048	0.0818771	-1.91035	2.3557e-06	0.411181	6.25172e-06	0.822522	9.49706
rs140190524	-18.2048	0.0818771	-1.91035	2.3557e-06	0.411181	6.25172e-06	0.822522	9.49706
rs184959520	-18.2048	0.0818771	-1.91035	2.3557e-06	0.411181	6.25172e-06	0.822522	9.49706
rs139585754	-18.2048	0.0818771	-1.91035	2.3557e-06	0.411181	6.25172e-06	0.822522	9.49706
rs75974495	-18.2048	0.0818771	-1.91035	2.3557e-06	0.411181	6.25172e-06	0.822522	9.49706
rs188877536	-18.2048	0.0818771	-1.91035	2.3557e-06	0.411181	6.25172e-06	0.822522	9.49706
rs78093016	-18.2048	0.0818771	-1.91035	2.3557e-06	0.411181	6.25172e-06	0.822522	9.49706
rs147762749	-18.2048	0.0818771	-1.91035	2.3557e-06	0.411181	6.25172e-06	0.822522	9.49706
rs139987367	-18.2048	0.0818771	-1.91035	2.3557e-06	0.411181	6.25172e-06	0.822522	9.49706
rs79741302	-18.2048	0.0818771	-1.91035	2.3557e-06	0.411181	6.25172e-06	0.822522	9.49706
rs188561108	-18.2048	0.0818771	-1.91035	2.3557e-06	0.411181	6.25172e-06	0.822522	9.49706
rs148921170	-18.2048	0.0818771	-1.91035	2.3557e-06	0.411181	6.25172e-06	0.822522	9.49706
rs58563114	-18.2048	0.0818771	-1.91035	2.3557e-06	0.411181	6.25172e-06	0.822522	9.49706
rs17285869	-18.2048	0.0818771	-1.91035	2.3557e-06	0.411181	6.25172e-06	0.822522	9.49706
rs188342261	-18.2048	0.0818771	-1.91035	2.3557e-06	0.411181	6.25172e-06	0.822522	9.49706
rs142208865	-18.2048	0.0818771	-1.91035	2.3557e-06	0.411181	6.25172e-06	0.822522	9.49706
rs182040920	-18.2048	0.0818771	-1.91035	2.3557e-06	0.411181	6.25172e-06	0.822522	9.49706
rs80232192	-18.2138	0.0818997	-1.90088	2.37928e-06	0.412901	6.30785e-06	0.82475	9.45025
rs137953911	-18.2059	0.0819545	-1.91146	2.38078e-06	0.400543	6.30233e-06	0.837998	9.50153
rs150282841	-18.2078	0.0819919	-1.8985	2.37236e-06	0.421531	6.2775e-06	0.81432	9.44232
rs144317872	-9.10742	0.0819933	-0.947297	2.40993e-06	0.416137	6.36067e-06	0.823316	9.42141
rs79045159	-18.1914	0.0819992	-1.94153	2.37608e-06	0.383294	6.30647e-06	0.849764	9.64353
rs117503332.COSV60212053	-18.207	0.0820157	-1.90633	2.37145e-06	0.415307	6.30897e-06	0.819402	9.47794
rs141985240	-18.207	0.0820192	-1.90785	2.35418e-06	0.414384	6.30962e-06	0.820389	9.48478
rs145058362	-18.2048	0.0820552	-1.90996	2.39584e-06	0.411518	6.32754e-06	0.82265	9.49528
rs145926571	-18.2048	0.0820552	-1.90996	2.39584e-06	0.411518	6.32754e-06	0.82265	9.49528
rs74815459	-18.2048	0.0820552	-1.90996	2.39584e-06	0.411518	6.32754e-06	0.82265	9.49528
rs555684936	-18.2048	0.0820552	-1.90996	2.39584e-06	0.411518	6.32754e-06	0.82265	9.49528
rs144521331	-18.2048	0.0820552	-1.90996	2.39584e-06	0.411518	6.32754e-06	0.82265	9.49528
rs148274683	-18.2048	0.0820552	-1.90996	2.39584e-06	0.411518	6.32754e-06	0.82265	9.49528
rs80169186	-18.2039	0.0820767	-1.91126	2.3814e-06	0.4115	6.19582e-06	0.822336	9.50159
rs190093515	-18.1989	0.0821008	-1.90108	2.3338e-06	0.394079	6.27782e-06	0.85366	9.45811
rs144818111	-18.1936	0.0821056	-1.93173	2.41177e-06	0.40864	6.38291e-06	0.817375	9.5985
rs117005966	-18.2116	0.0821174	-1.73936	2.32243e-06	0.374704	6.09578e-06	0.958414	8.71819
rs192779211	-18.2047	0.0821279	-1.90653	2.56331e-06	0.411684	6.06729e-06	0.822678	9.47992
rs76502135	-18.1998	0.0821426	-1.91628	2.35816e-06	0.409553	6.34789e-06	0.822937	9.52611
rs191455113	-18.1998	0.0821426	-1.91628	2.35816e-06	0.409553	6.34789e-06	0.822937	9.52611
rs117483918	-18.1979	0.0821647	-1.9129	2.3492e-06	0.406834	6.3388e-06	0.82894	9.51184
rs77074472	-18.1938	0.082199	-1.92198	2.37159e-06	0.403053	6.32637e-06	0.829809	9.55462
rs186915205	-18.1928	0.0822242	-1.93354	2.39224e-06	0.406635	6.34831e-06	0.818995	9.60703
rs117813880	-18.1957	0.0822257	-1.89375	2.60667e-06	0.411977	7.15351e-06	0.825413	9.42655
rs138583848	-18.1934	0.0822343	-1.9213	2.34601e-06	0.404107	6.32565e-06	0.829149	9.55173
rs147172117	-18.1893	0.0823098	-1.97006	2.4199e-06	0.403287	6.42071e-06	0.807639	9.7724
rs117929532	-9.09495	0.0823098	-0.964636	2.39245e-06	0.411479	6.17237e-06	0.814005	9.58922
rs76720238	-9.09287	0.0823831	-0.966355	2.29006e-06	0.404498	6.3462e-06	0.823632	9.60665
rs80071398	-18.1877	0.0824235	-1.93775	2.41085e-06	0.408139	6.40306e-06	0.81581	9.62838
rs142431868	-18.168	0.0824288	-1.91323	2.36316e-06	0.393154	6.35254e-06	0.847765	9.52749
rs117599468	-18.1819	0.0824436	-1.91352	2.38106e-06	0.411488	6.27696e-06	0.821325	9.52216
rs144809614	-18.1915	0.0824497	-1.86235	2.41709e-06	0.428164	6.06883e-06	0.820969	9.28671
rs144903521	-18.1745	0.0824836	-1.9391	2.3877e-06	0.419341	6.21658e-06	0.798911	9.64072
rs75438846	-18.1745	0.0824836	-1.9391	2.3877e-06	0.419341	6.21658e-06	0.798911	9.64072
rs576801873	-18.1745	0.0824836	-1.9391	2.3877e-06	0.419341	6.21658e-06	0.798911	9.64072
rs11036480	-18.1767	0.0824963	-1.9383	2.26116e-06	0.391088	6.30205e-06	0.842654	9.63608
rs149633810	-18.1601	0.0825231	-1.9514	2.36571e-06	0.390094	6.32962e-06	0.835119	9.7029
rs149299681	-18.1768	0.0825384	-1.94268	2.35159e-06	0.40811	6.12927e-06	0.812836	9.65575
rs151188154	-18.1677	0.0825403	-2.02039	2.91319e-06	0.407265	5.69546e-06	0.779107	10.0078
rs141044095	-18.183	0.0825483	-1.92027	2.38333e-06	0.397287	6.29685e-06	0.840938	9.55203
rs146980592	-18.1767	0.0825779	-1.95372	2.41956e-06	0.410967	6.32596e-06	0.80401	9.70527
rs145682657	-18.1649	0.0826243	-1.9762	2.39327e-06	0.401103	6.3465e-06	0.807742	9.81179
rs116968396	-18.1649	0.0826243	-1.9762	2.39327e-06	0.401103	6.3465e-06	0.807742	9.81179
rs145636984	-18.148	0.0826267	-1.96151	2.38719e-06	0.42037	6.26284e-06	0.786641	9.75414
rs117576669	-18.1635	0.0826953	-1.94938	2.29195e-06	0.390811	6.32999e-06	0.836896	9.6922
rs75164447	-18.1483	0.0827563	-1.95653	2.35632e-06	0.390837	6.32642e-06	0.831926	9.73167
rs77325671	-18.1965	0.0827879	-1.89674	2.48459e-06	0.426334	6.60554e-06	0.809718	9.43969
rs78594119	-18.1761	0.0828508	-1.92856	2.42815e-06	0.410373	6.33663e-06	0.817679	9.59257
rs77836279	-18.1492	0.0828762	-1.95387	2.50242e-06	0.398366	6.19113e-06	0.821926	9.71927
rs79021915	-7.04158	0.0829193	-0.653179	3.92555e-06	0.303574	NA	NA	8.48863
rs148417898	-18.1573	0.082948	-1.91212	2.43182e-06	0.395799	6.49662e-06	0.845379	9.52753
rs139420309	-18.1407	0.0829849	-1.94873	2.31801e-06	0.38937	6.33824e-06	0.83848	9.70027
rs184326825	-18.1628	0.0829877	-1.9594	2.42658e-06	0.392456	6.45787e-06	0.829575	9.73753
imm_16_73968664	0.915148	0.0830028	-0.0517162	1.81923e-06	0.544825	NA	NA	5.34886
rs140812674	-18.1702	0.0830036	-1.94521	1.89746e-06	0.438578	5.72847e-06	0.779599	9.67026
rs75249371	-18.159	0.0830147	-1.9435	2.41327e-06	0.389683	6.49363e-06	0.839393	9.66793
rs138881320	-18.1681	0.0830264	-1.98034	2.69162e-06	0.408553	6.6688e-06	0.79409	9.82877
rs142910242.COSV72155897	-18.1657	0.0830512	-1.89203	2.59029e-06	0.449541	6.7841e-06	0.78128	9.4329
rs186100104	-18.1835	0.0830531	-1.81445	2.34086e-06	0.450648	6.43056e-06	0.817762	9.07319
rs145539545	-18.1508	0.0831148	-1.93805	2.62908e-06	0.432468	6.33895e-06	0.780287	9.64737
rs59735373	-18.1213	0.0831155	-1.92331	2.44867e-06	0.422915	6.44457e-06	0.799356	9.59516
rs143273711	-18.1236	0.0831336	-2.00438	2.35788e-06	0.387282	6.31376e-06	0.815665	9.95818
rs150530277	-18.1236	0.0831336	-2.00438	2.35788e-06	0.387282	6.31376e-06	0.815665	9.95818
rs117199719	-18.1377	0.083257	-1.91381	2.4367e-06	0.413494	6.03083e-06	0.81824	9.54447
rs117103348	-18.1377	0.083257	-1.91381	2.4367e-06	0.413494	6.03083e-06	0.81824	9.54447
rs183179229	-18.1377	0.083257	-1.91381	2.4367e-06	0.413494	6.03083e-06	0.81824	9.54447
rs80052321	-18.1377	0.083257	-1.91381	2.4367e-06	0.413494	6.03083e-06	0.81824	9.54447
rs1107711	-18.1377	0.083257	-1.91381	2.4367e-06	0.413494	6.03083e-06	0.81824	9.54447
rs143071035	-18.1377	0.083257	-1.91381	2.4367e-06	0.413494	6.03083e-06	0.81824	9.54447
rs143938519	-18.1377	0.083257	-1.91381	2.4367e-06	0.413494	6.03083e-06	0.81824	9.54447
rs141273274.COSV62292497	-18.1377	0.083257	-1.91381	2.4367e-06	0.413494	6.03083e-06	0.81824	9.54447
rs77880877	-18.1511	0.0832601	-1.90814	2.80258e-06	0.412462	6.2674e-06	0.819065	9.51254
rs2234322	-18.1716	0.083283	-1.84585	2.4078e-06	0.402449	6.08399e-06	0.867524	9.22122
rs184723631	-18.1295	0.0833103	-1.87181	2.45603e-06	0.395407	6.63035e-06	0.86329	9.35844
rs74469315	-18.1158	0.0833423	-1.96886	2.36264e-06	0.406859	6.21492e-06	0.803171	9.80284
rs193223899	-18.1424	0.0833443	-1.98365	2.44383e-06	0.412192	6.27176e-06	0.79051	9.85613
rs117771000	-18.1214	0.0833902	-1.95159	2.37401e-06	0.396536	6.39716e-06	0.826424	9.72247
rs73971620	-18.092	0.0834356	-2.11484	2.34768e-06	0.342457	5.03753e-06	0.838138	10.466
rs138680262	-18.1327	0.0835254	-1.91974	2.4392e-06	0.411858	6.1238e-06	0.818657	9.5736
rs117187571	-18.1241	0.083631	-1.91401	2.44532e-06	0.406554	6.12873e-06	0.828925	9.55185
rs181201567	-18.0775	0.0836909	-2.03304	2.38114e-06	0.41906	6.14981e-06	0.757177	10.1093
rs78343152	-18.0775	0.0836909	-2.03304	2.38114e-06	0.41906	6.14981e-06	0.757177	10.1093
rs146874325	-18.1242	0.0836968	-1.86202	1.9606e-06	0.420026	5.88476e-06	0.839171	9.31653
rs77181098	-18.1159	0.0837623	-2.02893	2.27837e-06	0.394376	6.44492e-06	0.798005	10.0717
rs865866266.COSV63596753	-18.1343	0.0839879	-1.91272	2.5029e-06	0.419794	5.99799e-06	0.813145	9.54121
rs117638546	-18.0902	0.0840733	-1.94414	2.09205e-06	0.412779	6.29882e-06	0.810617	9.70405
rs147832263	-18.0976	0.0842456	-2.00873	2.46644e-06	0.391888	6.41729e-06	0.810429	9.99058
rs75827462	-18.0616	0.0842468	-2.02213	2.29123e-06	0.388195	6.17552e-06	0.807508	10.0685
rs185781921	-18.0946	0.0843831	-1.92043	2.45737e-06	0.403428	6.39207e-06	0.831761	9.59493
rs79799102.COSV50773771	-18.0769	0.0845419	-1.97618	2.46753e-06	0.410854	6.00826e-06	0.795565	9.85478
rs148032509	-18.0399	0.0847138	-2.02869	2.34849e-06	0.329948	6.52005e-06	0.898441	10.1088
imm_16_74000684	0.908153	0.0847701	-0.0511366	5.28037e-07	0.567407	NA	NA	5.33068
rs79925682	-18.0189	0.0848481	-2.09521	2.2876e-06	0.375108	6.17305e-06	0.794216	10.4166
rs188134673	-18.0106	0.0852145	-2.07087	2.13861e-06	0.374998	6.02132e-06	0.807741	10.3124
rs74446112	-18.0067	0.0852468	-1.99404	2.39361e-06	0.415872	5.95546e-06	0.780336	9.96981
rs147001784	-18.0303	0.0852803	-2.03123	2.12016e-06	0.364933	5.90542e-06	0.844028	10.125
rs146414283	-18.0082	0.0853685	-2.10827	2.23655e-06	0.402352	5.18334e-06	0.750601	10.4803
rs143116789	-18.0153	0.085447	-1.96769	2.34597e-06	0.401255	5.94184e-06	0.813891	9.84681
rs190410641	-18.0059	0.0855933	-2.10864	2.26559e-06	0.402597	5.24441e-06	0.750655	10.4832
imm_16_74028487	0.892363	0.0856893	-0.0405222	2.61847e-06	0.623637	NA	NA	4.34374
rs79286480	-17.9344	0.0858565	-1.65372	2.69643e-06	0.431982	7.39342e-06	0.901247	8.4425
rs190672052	-17.9344	0.0858565	-1.65372	2.69643e-06	0.431982	7.39342e-06	0.901247	8.4425
rs79168666	-17.9834	0.0859076	-2.10016	2.39107e-06	0.352989	6.17487e-06	0.828988	10.4571
rs148242667	-17.9692	0.0863228	-2.09952	1.71736e-06	0.373209	5.32558e-06	0.806742	10.4616
imm_16_74003106	0.908349	0.0864961	-0.0428491	5.89886e-07	0.633484	NA	NA	4.50475
rs148634388	-17.9381	0.0864969	-2.11028	1.94017e-06	0.361124	5.88666e-06	0.814801	10.526
rs117190498	-17.9012	0.0866931	-2.01429	2.79165e-06	0.427411	5.73385e-06	0.751352	10.1142
imm_16_73993732	0.90163	0.0873875	-0.0429493	3.80004e-07	0.635939	NA	NA	4.54693
rs144309472	-17.8575	0.0874719	-2.26566	2.07788e-06	0.397065	5.31067e-06	0.696554	11.259
imm_16_74033864	0.893379	0.0875884	-0.0414841	1.91476e-06	0.622571	NA	NA	4.43745
imm_16_74033952	0.893379	0.0875884	-0.0414841	1.91476e-06	0.622571	NA	NA	4.43745
rs186502932	-17.8104	0.0877135	-2.11638	2.08237e-06	0.43757	5.26231e-06	0.702995	10.6208
rs185478723	-17.7794	0.0892243	-1.72853	2.56296e-06	0.412594	7.26989e-06	0.899067	8.86066
imm_16_73993232	0.894088	0.0892962	-0.0482726	4.06466e-07	0.592468	NA	NA	5.12252
imm_16_74003176	0.894635	0.0893117	-0.0455693	3.66807e-07	0.61493	NA	NA	4.84674
rs117559981	-17.7412	0.0895243	-2.00714	2.19621e-06	0.380778	6.17916e-06	0.825791	10.1636
rs115260164	3.62721	0.0906129	-0.21677	1.51946e-05	0.0570264	3.58568e-07	0.274425	5.63922
rs11572851	3.20122	0.091463	-0.463698	6.29384e-06	0.110936	NA	NA	12.6523
imm_16_73994214	0.890378	0.0915109	-0.0521499	8.01283e-07	0.554483	NA	NA	5.53298
rs73981631	3.89817	0.0915703	-0.398475	1.32364e-05	0.242361	NA	NA	9.27409
imm_16_73981655	0.880469	0.0931677	-0.0426959	1.08731e-06	0.621568	NA	NA	4.62495
rs73953618	8.7821	0.0938093	-0.54576	1.91925e-08	0.583632	NA	NA	5.85085
rs116054196	-17.3314	0.095302	-2.36431	3.30192e-06	0.413453	8.34236e-06	0.629354	12.0041
imm_16_73999114	0.879147	0.0953913	-0.0488036	4.71198e-07	0.587055	NA	NA	5.25929
rs35263058	0.874642	0.0959974	-0.0440499	6.19471e-07	0.619022	NA	NA	4.79485
imm_16_73955753	0.872102	0.0961929	-0.0447473	3.0714e-07	0.622052	NA	NA	4.88055
imm_16_73954492	0.870045	0.0969305	-0.0457607	2.98945e-07	0.614281	NA	NA	4.99676
imm_16_73954788	0.870045	0.0969305	-0.0457607	2.98945e-07	0.614281	NA	NA	4.99676
imm_16_73951900	0.871051	0.0971772	-0.0454792	6.35611e-07	0.607341	NA	NA	4.96211
imm_16_73945935	0.873545	0.097323	-0.0386857	9.19424e-07	0.658504	NA	NA	4.24078
imm_16_74006422	0.869092	0.0978887	-0.0527993	9.68555e-07	0.544643	NA	NA	5.72728
imm_16_73992379	0.880485	0.0980191	-0.0450408	5.56694e-07	0.621568	NA	NA	4.86651
imm_16_73950307	0.872186	0.0980966	-0.0411571	6.20627e-07	0.64431	NA	NA	4.5062
imm_16_74029923	0.858449	0.0983937	-0.038843	3.58961e-06	0.633598	NA	NA	4.32891
imm_16_73870049	0.868802	0.0984695	-0.0405761	3.60594e-06	0.622914	NA	NA	4.46196
rs6079722	1.14908	0.0984967	-0.165991	8.7406e-06	0.113174	NA	NA	12.6222
imm_16_73951649	0.863672	0.0994256	-0.0438387	2.93578e-07	0.629681	NA	NA	4.83065
COSV52210145	0.862875	0.100536	-0.0439205	3.56862e-07	0.627405	NA	NA	4.84348
rs149175148	-12.0568	0.100948	-0.730318	1.66971e-05	0.495678	NA	NA	5.71137
rs148433271	9.76346	0.102329	-1.07193	6.01429e-06	0.241912	NA	NA	9.8929
imm_16_74019582	0.853868	0.103061	-0.0426363	8.30493e-07	0.625537	NA	NA	4.75584
imm_16_74019330	0.852842	0.103112	-0.042895	7.38476e-07	0.624462	NA	NA	4.78879
imm_16_74020214	0.852842	0.103112	-0.042895	7.38476e-07	0.624462	NA	NA	4.78879
imm_16_73971877	0.843842	0.107041	-0.0423581	8.28722e-07	0.627704	NA	NA	4.77975
rs77051500	3.6683	0.108187	-0.422726	3.09788e-06	0.241029	NA	NA	10.333
rs117392134	-11.8859	0.10966	-0.672787	1.00567e-05	0.545087	NA	NA	5.35714
rs145455370	-11.8512	0.111312	-0.727445	9.84671e-06	0.514561	NA	NA	5.78319
rs141668738	-11.8346	0.111383	-0.758162	1.00014e-05	0.495386	NA	NA	6.0206
rs117389913	-11.8346	0.111383	-0.758162	1.00014e-05	0.495386	NA	NA	6.0206
rs117131205	-11.8346	0.111383	-0.758162	1.00014e-05	0.495386	NA	NA	6.0206
rs79663439	-11.8346	0.111383	-0.758162	1.00014e-05	0.495386	NA	NA	6.0206
rs144299950	-11.832	0.111656	-0.762647	1.01173e-05	0.493079	NA	NA	6.05534
rs189390391	-11.8017	0.112144	-0.775813	1.05559e-05	0.484981	NA	NA	6.16824
rs4437734	-0.879437	0.112929	-0.0543975	8.7755e-06	0.514828	NA	NA	5.82517
rs76401327	2.30562	0.113799	-0.258948	1.5142e-05	0.226087	NA	NA	10.0971
rs76566630	-2.05482	0.116641	-0.210686	1.23688e-05	0.27747	NA	NA	9.29971
rs116170736	-2.35903	0.117154	-0.159019	2.07902e-06	0.511125	NA	NA	6.31515
rs147531239.COSV104570516	8.0832	0.118897	-1.17405	1.31502e-05	0.125405	NA	NA	12.6825
rs149111244	-6.72341	0.120649	-0.457538	3.99498e-06	0.498671	NA	NA	6.37155
rs112434816	-1.28883	0.122017	-0.090156	3.87755e-06	0.498707	NA	NA	6.53783
rs150123805	8.28769	0.122594	0.184465	4.77347e-09	0.862194	NA	NA	2.17731
rs9463642	5.23491	0.122665	-0.604126	6.11081e-06	0.245069	NA	NA	10.3463
rs117333627	-2.85434	0.126327	-0.318969	1.66006e-06	0.290659	NA	NA	10.0516
COSV52208992	0.80325	0.126789	-0.0428401	4.47759e-07	0.633317	NA	NA	5.06331
rs111509066	3.47882	0.133863	-0.387625	1.53042e-05	0.254321	NA	NA	10.0254
rs188238736	10.9992	0.136089	0.277655	1.35614e-06	0.818969	NA	NA	2.46217
rs79047578	10.9992	0.136089	0.277655	1.35614e-06	0.818969	NA	NA	2.46217
rs114474404	7.00426	0.136943	-1.24709	4.58338e-07	0.120919	NA	NA	15.1138
rs13026592	0.73092	0.140149	0.0507215	1.79313e-05	0.480791	NA	NA	6.4891
rs141023519	-2.87987	0.140183	-0.314134	1.21442e-05	0.278323	NA	NA	9.83513
imm_16_74024197	0.759637	0.144947	-0.0371936	1.59813e-06	0.660521	NA	NA	4.66769
rs8052308	-2.2712	0.145148	-0.254589	8.5727e-06	0.279007	NA	NA	10.0796
rs144465232	-10.8784	0.145241	-1.3723	5.58309e-07	0.27922	NA	NA	11.2018
rs76347993	-10.8255	0.147121	-1.2867	4.45874e-07	0.31373	NA	NA	10.6231
rs146800096	-10.7537	0.149579	-1.33931	4.45918e-07	0.293526	NA	NA	11.075
rs751917604	-10.7537	0.149579	-1.33931	4.45918e-07	0.293526	NA	NA	11.075
rs75101611	-10.7537	0.149579	-1.33931	4.45918e-07	0.293526	NA	NA	11.075
rs202186196	-10.7537	0.149579	-1.33931	4.45918e-07	0.293526	NA	NA	11.075
rs142160957	-10.7537	0.149579	-1.33931	4.45918e-07	0.293526	NA	NA	11.075
rs148784679	-10.7537	0.149579	-1.33931	4.45918e-07	0.293526	NA	NA	11.075
rs76994284	-10.7566	0.149714	-1.33591	4.47649e-07	0.295246	NA	NA	11.0474
imm_16_74024348	0.742246	0.154109	-0.0380906	1.47569e-06	0.653538	NA	NA	4.88131
rs189345325	-6.66289	0.15554	-0.487591	3.39244e-06	0.509642	NA	NA	6.81899
rs146025181	8.54928	0.156114	0.238099	1.26407e-06	0.810664	NA	NA	2.70956
rs138024882	-7.65257	0.156889	-0.938721	1.58041e-06	0.285531	NA	NA	10.9264
rs76363034	-7.65257	0.156889	-0.938721	1.58041e-06	0.285531	NA	NA	10.9264
JHU_X.443544	6.6783	0.158525	0.186143	1.23052e-07	0.826911	NA	NA	2.71169
rs151079256	-5.98566	0.161056	-0.477031	1.83408e-06	0.489056	NA	NA	7.3813
rs117711504	-8.35228	0.164853	-0.68652	8.67307e-07	0.492703	NA	NA	7.59526
rs190073949	-8.32308	0.166468	-0.714862	8.61722e-07	0.47553	NA	NA	7.90956
rs147847023	-6.4077	0.167009	-0.521968	6.37279e-06	0.471005	NA	NA	7.53236
rs1351158	2.59791	0.168746	-0.560033	4.04305e-06	0.25892	3.84902e-07	0.586373	17.7341
rs28583993	-2.492	0.169406	-0.320372	1.18061e-06	0.281394	NA	NA	11.3915
rs11857175	1.24762	0.170077	-0.109169	6.29977e-07	0.478689	NA	NA	8.04615
rs17134784	2.63726	0.171385	0.0786726	6.71563e-07	0.809266	NA	NA	2.89671
rs150475809	-8.26959	0.172945	-0.977844	1.63548e-05	0.270241	NA	NA	10.5742
rs115054514	-2.92135	0.173701	0.0488561	6.1242e-06	0.236192	5.31737e-07	0.238039	1.64487
rs117129608	-6.31521	0.173884	-0.497422	1.02001e-05	0.473679	NA	NA	7.30146
rs191830054	6.97293	0.176892	0.464844	1.55248e-05	0.539573	NA	NA	6.24977
rs111347886	-8.09225	0.178507	-0.917055	3.49167e-06	0.336053	NA	NA	10.179
rs148968284	-10.007	0.179038	-1.21722	1.12292e-05	0.272707	NA	NA	10.8446
rs79677861	-9.99282	0.179517	-1.22137	1.11179e-05	0.270883	NA	NA	10.8913
rs147420971	-9.99282	0.179517	-1.22137	1.11179e-05	0.270883	NA	NA	10.8913
rs117925630	-9.99282	0.179517	-1.22137	1.11179e-05	0.270883	NA	NA	10.8913
rs117455202	-9.99282	0.179517	-1.22137	1.11179e-05	0.270883	NA	NA	10.8913
rs141672178	-9.99282	0.179517	-1.22137	1.11179e-05	0.270883	NA	NA	10.8913
rs78023683	-9.85292	0.179656	-1.21492	8.97877e-06	0.271782	NA	NA	10.977
rs146207088	-9.852	0.185249	-1.37787	1.09122e-05	0.214695	NA	NA	12.2697
rs145458445	-4.64668	0.185652	0.873081	1.26647e-06	0.129762	NA	NA	15.8174
rs145529594	-4.6337	0.18694	0.856629	1.27539e-06	0.137305	NA	NA	15.6025
rs79174017	-3.78878	0.194782	-0.510533	2.30066e-06	0.275124	NA	NA	11.8748
rs10967875	0.790349	0.19844	-0.100163	1.45801e-05	0.266856	NA	NA	11.2478
rs61735358.COSV99877644	3.83973	0.199458	-0.48938	1.35443e-05	0.267411	NA	NA	11.3044
rs147905017	-7.84561	0.202322	-0.995279	1.32128e-05	0.273912	NA	NA	11.2577
rs73338617	1.93846	0.205445	-0.251511	1.20282e-05	0.268036	NA	NA	11.4847
rs78835307	2.3506	0.20792	-0.308592	1.7321e-05	0.257959	NA	NA	11.6047
rs148919436	-7.73875	0.209455	-1.1336	5.37992e-07	0.278594	NA	NA	12.7768
rs77661219	-7.73875	0.209455	-1.1336	5.37992e-07	0.278594	NA	NA	12.7768
rs75759688	-7.70707	0.210495	-1.01088	1.39908e-05	0.265479	NA	NA	11.5954
rs142930187	-7.68127	0.211903	-1.01345	1.37607e-05	0.263986	NA	NA	11.6559
rs138508820.COSV60194152.COSV60196257	-7.68127	0.211903	-1.01345	1.37607e-05	0.263986	NA	NA	11.6559
rs138809000	-7.68127	0.211903	-1.01345	1.37607e-05	0.263986	NA	NA	11.6559
rs75883103	-7.67929	0.212159	-1.0242	1.3947e-05	0.259057	NA	NA	11.7677
rs78958026	-7.66996	0.212693	-1.01698	1.39008e-05	0.262481	NA	NA	11.707
rs148635749	-3.74847	0.224263	-0.603051	5.61886e-07	0.250107	NA	NA	13.8584
rs28564459	3.97337	0.224674	0.149523	4.72279e-08	0.805465	NA	NA	3.62666
rs114583383	6.35295	0.22709	0.241419	1.02873e-07	0.799651	NA	NA	3.66099
rs115895926	6.35295	0.22709	0.241419	1.02873e-07	0.799651	NA	NA	3.66099
rs13183250	-0.907053	0.239129	-0.0867906	7.10513e-06	0.458902	NA	NA	8.73282
rs182884588	-3.09025	0.24796	-0.450004	1.10966e-05	0.258979	NA	NA	12.7111
rs114464446	-3.09025	0.24796	-0.450004	1.10966e-05	0.258979	NA	NA	12.7111
rs148764537.COSV61115419	4.64371	0.248241	0.222407	2.31913e-07	0.753298	NA	NA	4.57052
rs149786280	-8.58578	0.249754	-1.25848	1.0477e-05	0.259001	NA	NA	12.7839
rs117059968	-8.58578	0.249754	-1.25848	1.0477e-05	0.259001	NA	NA	12.7839
rs148134772	-8.58605	0.250035	-1.25949	1.02697e-05	0.259648	NA	NA	12.7925
rs74392178	-2.17193	0.251181	-0.340322	1.90483e-06	0.265188	NA	NA	13.5465
rs184215464	1.49182	0.255238	0.00643544	1.17844e-06	0.976194	NA	NA	0.42953
rs80307148	-4.44737	0.257273	-0.457555	3.28961e-06	0.459326	NA	NA	9.32849
rs138291117	-6.80791	0.258851	-1.02661	8.96328e-06	0.258206	NA	NA	13.1036
rs72789334	-1.07789	0.260751	0.100769	1.19503e-06	0.524861	NA	NA	8.54942
rs73624941	2.02924	0.265078	-0.290813	1.20108e-05	0.281924	NA	NA	12.5348
rs187428364	3.77742	0.265404	-0.77414	4.83782e-06	0.140927	NA	NA	17.0082
rs373885001	5.08343	0.272526	-1.01839	9.75047e-06	0.142857	NA	NA	16.69
rs79992884	-6.77768	0.272648	-1.16646	5.01735e-07	0.267183	NA	NA	14.6833
rs6546272	0.580205	0.273918	0.0586917	1.78321e-05	0.44659	NA	NA	9.18642
rs5921578	0.977558	0.276455	0.0453567	2.60985e-08	0.78935	NA	NA	4.43407
rs73954229	6.55977	0.278463	0.296992	6.50742e-07	0.771929	NA	NA	4.33138
rs113673946	2.10075	0.285607	-0.416621	1.80244e-05	0.145445	NA	NA	16.5498
rs115423851	-3.69969	0.286086	-0.404704	4.82699e-06	0.451116	NA	NA	9.86027
rs111870807	2.34175	0.293727	-0.536764	3.94414e-06	0.12465	NA	NA	18.6472
rs145681254	-3.59221	0.294322	0.355746	1.41975e-06	0.528417	NA	NA	9.01089
rs10437747	1.09034	0.294967	0.121763	5.06607e-06	0.449087	NA	NA	10.0456
rs7710712	-3.93176	0.297324	0.405282	1.07808e-06	0.517514	NA	NA	9.34466
rs76250915.COSV60756928	1.21979	0.300042	0.0303658	1.6585e-06	0.877127	NA	NA	2.42895
rs2303430.COSV99958199	0.59842	0.301858	0.0654237	1.02607e-05	0.450687	NA	NA	9.85528
rs79720263	2.35671	0.320896	-0.375671	1.19205e-05	0.286218	NA	NA	13.7489
rs6557316	-0.496651	0.333602	-0.0611195	4.77006e-06	0.442388	NA	NA	10.9578
rs6557316.1	-0.496651	0.333602	-0.0611195	4.77006e-06	0.442388	NA	NA	10.9578
rs73029631	2.3437	0.336309	0.439493	3.64262e-06	0.250725	NA	NA	15.791
rs79152278	-2.42541	0.339836	0.265547	1.1892e-06	0.527378	NA	NA	9.86812
rs116324835	2.35247	0.34165	-0.530466	1.17266e-05	0.149282	NA	NA	18.4002
rs114834396	-2.73056	0.344507	-0.341166	6.79723e-06	0.438481	NA	NA	11.1067
rs139966602	-2.61195	0.345564	-0.341699	2.153e-06	0.442303	NA	NA	11.5687
rs73630199	3.89155	0.359275	-0.976478	4.73916e-06	0.138938	NA	NA	20.059
rs118120551	-3.66625	0.364277	-0.697623	1.38645e-05	0.242445	NA	NA	15.9863
rs538287	-0.469221	0.37197	0.0842578	1.60709e-05	0.274711	NA	NA	15.2233
rs372042	-0.617655	0.376848	-0.0938967	1.56179e-05	0.359068	NA	NA	13.196
rs115195951	2.47745	0.381271	-0.448723	8.5171e-06	0.293167	NA	NA	15.3348
rs79270317	3.5111	0.384495	-0.624991	1.19117e-05	0.297253	NA	NA	15.1107
rs116335195	3.43346	0.391076	-0.862874	8.79481e-06	0.15287	NA	NA	20.084
rs76385638	-2.87523	0.39843	-0.68152	2.67944e-07	0.250666	NA	NA	19.1613
rs111660869	1.80742	0.399279	-0.451035	1.3649e-05	0.154076	NA	NA	19.9709
rs117237153	-4.34902	0.404844	-0.930951	7.4109e-06	0.240707	NA	NA	17.6318
rs116866072	-3.58516	0.407695	-0.746384	1.66944e-05	0.237968	NA	NA	17.2314
rs56916745	3.53247	0.414561	0.243689	8.86182e-07	0.736533	NA	NA	6.45334
rs79066822	-2.49752	0.429221	-0.563981	8.1985e-06	0.23793	NA	NA	18.4217
rs141944886	-4.095	0.4343	-0.973549	6.80564e-06	0.223476	NA	NA	19.2076
rs139270070	1.92315	0.436337	-0.509882	1.71664e-05	0.157191	NA	NA	20.9567
rs7882468	-0.759689	0.444136	-0.128797	1.29057e-06	0.428218	NA	NA	14.4962
rs76232597	-2.25033	0.44497	-0.570585	1.03774e-06	0.241818	NA	NA	20.227
rs9342351	-0.581976	0.445872	-0.133826	1.31818e-05	0.234443	NA	NA	18.6959
rs1986382	-0.407559	0.453042	-0.0759491	4.51778e-06	0.37095	NA	NA	15.7079
rs139827215.COSV55097108	5.51634	0.45372	0.448909	7.83482e-07	0.716992	NA	NA	7.5254
rs9727148	-2.20467	0.453741	0.141718	2.09847e-06	0.764753	NA	NA	6.03984
rs17499798	5.48734	0.455918	0.430851	7.45689e-07	0.728162	NA	NA	7.28012
rs17500264	5.48734	0.455918	0.430851	7.45689e-07	0.728162	NA	NA	7.28012
rs79930079	-5.37638	0.460821	-0.898253	6.44006e-06	0.420164	NA	NA	14.3156
rs4561537	-0.708847	0.467484	-0.111543	8.4628e-06	0.451731	NA	NA	13.5964
rs139978877	5.26372	0.473762	-1.5917	5.86237e-06	0.158691	NA	NA	23.2182
rs11998041	-1.0252	0.486681	-0.266207	7.36306e-06	0.235615	NA	NA	20.6138
rs112533857	2.14433	0.488388	-0.690409	5.35973e-06	0.14878	NA	NA	24.3553
rs799240	2.34168	0.489316	-0.721114	7.80778e-06	0.160163	NA	NA	23.5443
rs11121727	-1.11762	0.490463	0.352361	5.10631e-06	0.159825	NA	NA	23.9705
rs11121727.1	-1.11762	0.490463	0.352361	5.10631e-06	0.159825	NA	NA	23.9705
rs799240.1	2.31823	0.494558	-0.721479	8.64007e-06	0.15968	NA	NA	23.7351
rs76108114	2.55872	0.504908	-0.836982	4.53778e-06	0.160696	NA	NA	24.6483
rs151161585	-3.93971	0.508512	-0.748849	5.59979e-06	0.414002	NA	NA	15.9719
rs78550505	0.760654	0.512696	0.209457	9.52777e-06	0.22985	NA	NA	21.591
rs10843210	-0.330791	0.513034	-0.0605219	1.81739e-05	0.409421	NA	NA	15.4664
rs773905945.COSV51657690	6.70178	0.515639	-1.64313	5.16927e-06	0.302289	NA	NA	19.6902
rs78383629	-3.03885	0.5161	-1.0421	4.59049e-06	0.152856	NA	NA	25.5358
rs8009460	1.18725	0.51619	0.0329876	3.71576e-06	0.90838	NA	NA	2.70338
rs148475876	6.66324	0.51824	-1.62648	5.1413e-06	0.307547	NA	NA	19.6204
rs41303348	6.65787	0.518329	-1.62079	5.14553e-06	0.308656	NA	NA	19.5779
rs200749025	6.65787	0.518329	-1.62079	5.14553e-06	0.308656	NA	NA	19.5779
rs147526482	6.65787	0.518329	-1.62079	5.14553e-06	0.308656	NA	NA	19.5779
rs201288428.COSV55830330	6.65787	0.518329	-1.62079	5.14553e-06	0.308656	NA	NA	19.5779
rs150470903	6.65787	0.518329	-1.62079	5.14553e-06	0.308656	NA	NA	19.5779
rs145975508.COSV61734445	6.65787	0.518329	-1.62079	5.14553e-06	0.308656	NA	NA	19.5779
rs199968197	6.65787	0.518329	-1.62079	5.14553e-06	0.308656	NA	NA	19.5779
rs149736299	6.65787	0.518329	-1.62079	5.14553e-06	0.308656	NA	NA	19.5779
X15.45412400.GAGA.G	6.65787	0.518329	-1.62079	5.14553e-06	0.308656	NA	NA	19.5779
rs368081185.COSV60889751	6.65787	0.518329	-1.62079	5.14553e-06	0.308656	NA	NA	19.5779
rs144333393	6.65787	0.518329	-1.62079	5.14553e-06	0.308656	NA	NA	19.5779
rs539897980	6.65787	0.518329	-1.62079	5.14553e-06	0.308656	NA	NA	19.5779
rs141623013.COSV100652098	6.65787	0.518329	-1.62079	5.14553e-06	0.308656	NA	NA	19.5779
rs145087122	6.65841	0.51854	-1.62085	5.20932e-06	0.308929	NA	NA	19.5772
rs74839819	-1.64845	0.518612	-0.422168	9.96239e-06	0.276698	NA	NA	20.3885
rs138637165.CM1611198	6.66047	0.518634	-1.63545	5.32608e-06	0.304643	NA	NA	19.7139
rs117100657	6.64325	0.51942	-1.71041	5.29182e-06	0.283656	NA	NA	20.475
rs28730722.COSV54862081	6.63725	0.519814	-1.62919	5.32261e-06	0.306187	NA	NA	19.7085
rs72553952	-2.24388	0.52562	0.348429	1.21035e-06	0.551149	NA	NA	13.4408
rs77776973	1.94608	0.530663	-0.653636	8.53771e-06	0.163152	NA	NA	25.1426
rs79250166	-1.45362	0.530881	0.258304	4.1085e-09	0.576227	NA	NA	15.0885
rs565615420	6.36261	0.536232	-1.49266	5.56905e-06	0.349363	NA	NA	19.002
rs115117038	2.21928	0.536611	0.236331	6.66196e-08	0.719947	NA	NA	9.62409
rs1996707	-3.27523	0.538849	-0.996902	4.55624e-06	0.228831	NA	NA	23.335
rs144113658	1.18085	0.544122	0.238233	1.35915e-05	0.406595	NA	NA	16.7878
rs55730213	0.461687	0.552636	-0.16147	1.04437e-05	0.164914	NA	NA	25.9116
rs1544279	0.381641	0.554539	0.0424169	1.77339e-07	0.711316	NA	NA	10.0026
rs76356005	-2.76912	0.555805	-0.601185	5.04028e-06	0.408068	NA	NA	17.8377
JHU_X.68616542	0.86083	0.561374	-0.30553	1.02729e-05	0.171336	NA	NA	26.1951
rs1869827	-1.23058	0.56841	0.262421	4.79955e-07	0.478707	NA	NA	17.5767
rs74742299	-0.522974	0.569255	-0.17048	1.25491e-06	0.258705	NA	NA	24.5841
rs6777050	-0.338145	0.57347	-0.0802954	1.66948e-06	0.409312	NA	NA	19.1892
rs74742299.1	-0.513585	0.575591	-0.167642	3.31968e-06	0.246772	NA	NA	24.6089
rs12427819	0.734385	0.576817	0.0275209	3.4945e-08	0.910639	NA	NA	3.61212
rs60716510	-1.24215	0.577401	-0.0454433	3.22443e-06	0.897174	NA	NA	3.52932
rs76321912	0.682209	0.57792	0.230674	4.79672e-06	0.225044	NA	NA	25.2687
rs79547784	-2.60834	0.578684	-0.601334	1.36355e-05	0.385516	NA	NA	18.7351
rs77648144	-1.09429	0.580004	-0.355748	1.37566e-05	0.222544	NA	NA	24.5336
rs142417959	-4.02847	0.580629	-0.914683	9.58355e-06	0.403048	NA	NA	18.504
rs138843033	2.87451	0.588522	-0.854095	2.12676e-06	0.315425	NA	NA	22.9066
rs117950089	-2.83645	0.59017	-0.651099	7.0377e-06	0.416969	NA	NA	18.6693
rs1408282	-0.431297	0.592878	-0.143303	1.7829e-05	0.221033	NA	NA	24.9396
rs7433096	-0.393876	0.595551	-0.093833	8.71398e-06	0.401633	NA	NA	19.2395
rs28449551	2.74646	0.599862	-0.751375	1.2583e-05	0.33288	NA	NA	21.4811
rs74606713	-3.89403	0.600242	-1.77479	3.71092e-07	0.346123	9.5897e-07	0.739974	31.308
rs17071497	-3.89403	0.600242	-1.77479	3.71092e-07	0.346123	9.5897e-07	0.739974	31.308
JHU_3.102967266	-0.311497	0.604534	-0.0788808	1.70395e-06	0.418381	NA	NA	20.2063
imm_1_153369771	0.266733	0.609121	-0.0481191	1.22682e-06	0.576492	NA	NA	15.2831
rs138291276	-1.719	0.612279	-0.484304	3.45763e-07	0.407562	NA	NA	21.9808
rs9596751	0.430934	0.613207	-0.125822	1.17497e-05	0.320225	NA	NA	22.5991
rs114047728	2.97268	0.633831	0.461661	1.03957e-08	0.702269	NA	NA	13.4425
rs184301693	-1.93256	0.63445	0.371333	1.05699e-06	0.581777	NA	NA	16.1176
rs17028895	-0.365851	0.642889	0.157619	1.69498e-05	0.171203	NA	NA	30.1104
rs75627650	0.715663	0.647986	0.199011	1.0723e-05	0.39478	NA	NA	21.7576
rs2139515	-0.38919	0.648464	0.125781	1.06394e-05	0.323588	NA	NA	24.4248
rs28667046	-0.324599	0.653376	-0.0911454	1.24267e-05	0.394036	NA	NA	21.9234
rs190535783	-1.40948	0.65383	-0.568424	1.59531e-05	0.216809	NA	NA	28.7387
rs824883	-0.34406	0.660213	-0.103554	4.30415e-06	0.395307	NA	NA	23.1347
rs150026771	-3.23974	0.661053	-1.63436	7.02734e-08	0.225182	NA	NA	33.5316
rs145873923	-2.6203	0.663773	-0.758872	1.41275e-05	0.392352	NA	NA	22.4573
rs114006288	0.443826	0.667719	0.144706	6.05568e-06	0.378852	NA	NA	24.5876
rs12232572	-0.840688	0.670867	0.305045	3.76676e-06	0.324902	NA	NA	26.6244
rs13188025	-0.860261	0.67534	-0.262265	1.09732e-05	0.39157	NA	NA	23.3638
rs117189518	-3.05032	0.678508	-1.35734	8.7007e-06	0.222287	NA	NA	30.795
rs143857932	-3.03667	0.679721	-1.35563	8.63802e-06	0.223073	NA	NA	30.8637
rs544207972	-1.3008	0.680833	-0.128412	2.62914e-06	0.0830727	1.13862e-07	0.184429	8.98483
rs568099192	-1.29791	0.681563	-0.12833	2.59749e-06	0.0810582	1.11922e-07	0.181096	8.99781
rs115436176	0.991344	0.686728	0.193242	1.19844e-07	0.662672	NA	NA	16.3131
rs1486830	-1.02065	0.686961	-0.335365	4.98166e-06	0.391976	NA	NA	24.7317
rs4756680	0.209438	0.686995	0.0998707	4.31832e-06	0.217254	NA	NA	32.2884
rs144659455	-2.1617	0.68724	0.490208	6.35046e-07	0.589182	NA	NA	18.4851
rs10824740.COSV57889469	0.216461	0.689132	0.0707477	6.62583e-06	0.391455	NA	NA	24.6329
rs10824740.COSV57889469.1	0.214082	0.692534	0.0731613	6.35094e-06	0.376988	NA	NA	25.4702
rs117384094	-1.30064	0.695837	-0.468625	7.71435e-07	0.400287	NA	NA	26.487
rs557069225	1.22664	0.69619	-0.620944	1.65074e-05	0.176179	NA	NA	33.6085
rs242682	0.910192	0.698501	-0.499083	4.06694e-06	0.174095	NA	NA	35.4141
rs115759450	-1.2552	0.701176	0.322081	9.09225e-08	0.587856	NA	NA	20.42
rs77398130	-0.913724	0.706035	-0.440931	1.66939e-05	0.212602	NA	NA	32.5493
rs865885084	0.960229	0.708961	0.325408	1.60562e-05	0.387079	NA	NA	25.311
rs117676762	-1.96634	0.712825	-1.07176	2.04823e-06	0.212901	NA	NA	35.2773
rs2056862	0.181028	0.713224	-0.0788804	1.24768e-06	0.32838	NA	NA	30.3493
rs11914543	0.601811	0.718867	-0.268603	1.15864e-06	0.32907	NA	NA	30.8592
rs114192932	-1.20808	0.721517	-0.43496	1.24288e-05	0.386304	NA	NA	26.4729
rs191353566	1.83105	0.722824	-0.761555	7.59786e-06	0.330843	NA	NA	29.3741
rs59894521	0.89819	0.723018	-0.618167	1.21601e-07	0.173235	NA	NA	40.7666
rs79490573	2.11292	0.72367	-1.18307	1.60879e-05	0.176265	NA	NA	35.8942
rs10984980.COSV52962906	-0.354027	0.726778	-0.192156	6.61594e-06	0.212818	NA	NA	35.1816
rs9409617	0.271468	0.727227	-0.158852	8.46897e-06	0.176348	NA	NA	36.9149
rs17171504	0.317796	0.730362	0.126248	2.4719e-06	0.387913	NA	NA	28.4314
rs3760739	0.182262	0.733941	0.0983287	1.48367e-05	0.210536	NA	NA	35.0435
rs76311122	-0.550176	0.734884	-0.297246	1.64947e-05	0.210682	NA	NA	35.0765
rs114357990	-1.59311	0.736051	-0.900596	6.56972e-06	0.211541	NA	NA	36.1147
rs12294553	-0.849249	0.741078	-0.506629	3.08009e-06	0.212467	NA	NA	37.3654
rs17402704	0.306981	0.744547	0.172039	1.72688e-05	0.210653	NA	NA	35.9148
rs138951419	-1.40103	0.745906	-0.56181	1.06527e-05	0.383976	NA	NA	28.6223
rs144647750	-1.13032	0.746013	-0.671115	5.66067e-06	0.211557	NA	NA	37.2545
X8.10622924.TTTC.T	1.30132	0.746936	-1.04196	1.98198e-06	0.301049	1.53593e-06	0.675776	44.4659
rs73814310	0.182182	0.747895	0.0778146	1.24134e-05	0.36067	NA	NA	29.9291
rs2203088	-0.154747	0.748852	0.0709009	7.41239e-06	0.333471	NA	NA	31.421
rs114313699	0.838611	0.750611	0.332231	1.53346e-05	0.390887	NA	NA	28.3754
rs9409438	0.24666	0.755659	-0.156686	1.48403e-05	0.178311	NA	NA	38.8465
rs115876643	1.01181	0.755661	0.229755	8.20791e-07	0.673727	NA	NA	18.5052
rs142628952	0.582184	0.76171	-0.406074	3.54194e-06	0.178333	NA	NA	41.0899
rs113368918	1.01459	0.765313	-0.505722	9.28941e-06	0.322334	NA	NA	33.2644
JHU_11.41911004	0.149202	0.774168	0.0986984	8.81494e-06	0.208814	NA	NA	39.8137
rs72857725	-0.558219	0.774663	0.0822201	2.17548e-06	0.79269	NA	NA	12.8381
rs151024901	1.03026	0.774918	-0.705116	1.74268e-05	0.17947	NA	NA	40.6319
rs34362304	-0.226471	0.782489	0.067584	2.52743e-06	0.613704	NA	NA	22.9834
rs28688016	-0.755971	0.784733	-0.619384	1.06547e-07	0.2131	NA	NA	45.0345
rs149276357	0.807218	0.786092	0.217404	4.72667e-07	0.669801	NA	NA	21.218
rs72773947	0.249765	0.788226	0.157064	1.11475e-05	0.257509	NA	NA	38.6069
rs4707795	-0.170617	0.789684	-0.127649	2.69853e-06	0.209322	NA	NA	42.797
rs114687431	0.764067	0.791576	-0.393793	9.6776e-06	0.36457	NA	NA	34.0104
JHU_4.102594138	-0.128568	0.793021	-0.0571737	1.46307e-05	0.429246	NA	NA	30.7813
rs17128467	-0.303033	0.795321	0.0525963	1.30542e-06	0.783614	NA	NA	14.7897
rs113500977	0.817419	0.800055	0.229152	1.38235e-06	0.665776	NA	NA	21.8955
rs62443591	0.243505	0.802748	0.123421	9.78127e-06	0.395538	NA	NA	33.6365
rs59285907	0.666678	0.804448	-0.378125	1.46196e-05	0.339248	NA	NA	36.191
rs1452787	0.144639	0.809719	-0.0905773	3.13456e-06	0.339261	NA	NA	38.5081
rs9568202	-0.258677	0.813783	-0.143353	1.33575e-05	0.376468	NA	NA	35.6573
rs74118705	0.264805	0.814473	0.225642	3.00331e-06	0.20694	NA	NA	46.0074
rs147319068	-1.40047	0.816777	-1.26408	9.28213e-07	0.208402	NA	NA	47.4406
rs6536093	-0.119821	0.824478	0.104663	1.82947e-05	0.182551	NA	NA	46.624
rs76318746	-1.27221	0.832799	-1.18991	4.21992e-06	0.205615	NA	NA	48.3287
rs143037153	-1.27221	0.832799	-1.18991	4.21992e-06	0.205615	NA	NA	48.3287
rs56319744	0.195514	0.834256	0.171349	1.01723e-05	0.220795	NA	NA	46.7065
rs7005777	-0.119252	0.842845	0.0904242	2.86836e-06	0.342603	NA	NA	43.1257
rs72773922	0.182582	0.844946	0.175576	1.2867e-05	0.203755	NA	NA	49.0219
rs72773923	0.182582	0.844946	0.175576	1.2867e-05	0.203755	NA	NA	49.0219
rs72773932	0.182582	0.844946	0.175576	1.2867e-05	0.203755	NA	NA	49.0219
rs11750934	0.182582	0.844946	0.175576	1.2867e-05	0.203755	NA	NA	49.0219
rs11738810	0.182582	0.844946	0.175576	1.2867e-05	0.203755	NA	NA	49.0219
rs11748519	0.182582	0.844946	0.175576	1.2867e-05	0.203755	NA	NA	49.0219
rs11743410	0.182582	0.844946	0.175576	1.2867e-05	0.203755	NA	NA	49.0219
rs10515249	0.182582	0.844946	0.175576	1.2867e-05	0.203755	NA	NA	49.0219
rs12424587	0.654093	0.847547	-0.673788	1.11944e-05	0.183956	NA	NA	50.7416
rs17176375	0.185088	0.847968	0.128318	9.41037e-06	0.373115	NA	NA	40.943
rs78337173	0.24889	0.852862	-0.185118	1.71474e-05	0.343928	NA	NA	42.6532
rs78337173.1	0.24881	0.852994	-0.185118	1.73443e-05	0.344209	NA	NA	42.661
rs4877985	-0.276739	0.857159	-0.199966	1.75342e-05	0.37169	NA	NA	41.9476
rs72773924	0.165322	0.859481	0.17704	1.27432e-05	0.200609	NA	NA	51.7113
rs149212121	-1.27132	0.863821	-1.80235	1.4404e-06	0.330027	7.5278e-07	0.7118	58.6383
rs138766114	-0.598968	0.864471	-0.651566	1.80575e-05	0.201985	NA	NA	52.103
rs148141096	-0.598968	0.864471	-0.651566	1.80575e-05	0.201985	NA	NA	52.103
rs77769808	-0.254826	0.874619	-0.213591	1.33097e-05	0.370317	NA	NA	45.5985
rs79993170	-0.13541	0.877012	-0.124221	2.67768e-06	0.371813	NA	NA	47.8453
rs79243018	0.669095	0.878186	-0.853674	1.3243e-05	0.185867	NA	NA	56.0606
rs864821	0.12034	0.888105	-0.116773	1.82785e-05	0.347261	NA	NA	49.2477
rs17013105	-0.647747	0.890136	-0.906342	8.31814e-06	0.2014	NA	NA	58.3198
rs145884040	-0.490481	0.89032	0.192384	8.32742e-06	0.10931	9.32701e-09	0.141139	28.173
rs61956274	0.988296	0.893044	-0.914738	9.25089e-06	0.414708	NA	NA	48.0674
rs4580909	0.173363	0.897147	-0.186523	1.22481e-05	0.348429	NA	NA	51.8284
rs112530541	-0.359932	0.898364	-0.533797	9.47253e-06	0.209267	NA	NA	59.727
rs192482164	-0.641542	0.903713	-1.15437	5.08492e-07	0.201035	NA	NA	64.2776
rs57519512	-0.285295	0.905263	0.202656	4.69889e-07	0.621776	NA	NA	41.532
rs55927720	-0.0674231	0.909303	-0.0834568	3.64577e-06	0.368173	NA	NA	55.3134
rs35508255	-0.302275	0.909923	-0.518915	8.03796e-06	0.199694	NA	NA	63.1907
rs7880476	-0.0522746	0.913643	-0.0159689	7.98724e-07	0.842766	NA	NA	23.3999
rs113713560	0.412128	0.917373	-0.553287	1.09726e-05	0.350088	NA	NA	57.3108
rs17686457	-0.0540894	0.918435	-0.0723682	7.43124e-06	0.36638	NA	NA	57.2272
JHU_8.88692399	-0.0576791	0.918669	-0.0772893	7.61851e-06	0.366504	NA	NA	57.2647
rs117225291	0.207202	0.919928	-0.280401	1.74285e-05	0.350264	NA	NA	57.506
rs3760440	0.0526404	0.923038	0.0753141	6.04628e-06	0.36645	NA	NA	58.8601
rs872241	0.0472437	0.927547	-0.100999	1.27267e-05	0.1889	NA	NA	68.1307
rs12307709	-0.0424931	0.929282	-0.06567	7.59483e-06	0.36536	NA	NA	60.7139
rs77205182	-0.143832	0.930416	-0.227684	6.57715e-06	0.365356	NA	NA	61.2852
rs117020986	-0.226354	0.934952	-0.367661	1.64084e-05	0.364175	NA	NA	61.8942
rs61733089	-0.267712	0.939486	-0.710933	3.76039e-06	0.19804	NA	NA	72.6447
exm2271703	-0.0279452	0.953369	-0.0640102	1.40026e-05	0.362474	NA	NA	69.61
rs72773968.COSV99031664	-0.0392637	0.965882	0.177304	1.31046e-05	0.191411	NA	NA	81.87
rs72773968.COSV99031664.1	-0.0392637	0.965882	0.177304	1.31046e-05	0.191411	NA	NA	81.87
rs76108164	0.112924	0.966606	-0.536176	7.19903e-06	0.191647	NA	NA	82.603
rs16938394	-0.071907	0.967727	-0.342091	1.16752e-05	0.195654	NA	NA	82.6311
rs4457736	-0.071907	0.967727	-0.342091	1.16752e-05	0.195654	NA	NA	82.6311
rs114674819	0.280739	0.969456	0.570928	9.67849e-07	0.640512	NA	NA	67.0365
rs114744690	0.105037	0.976003	-0.493779	6.14826e-06	0.356022	NA	NA	82.4592
rs116785568	-0.157484	0.976023	0.44058	2.31679e-07	0.6327	NA	NA	73.6677
rs114051767	0.118155	0.976652	0.313361	1.14723e-06	0.639327	NA	NA	72.6187
rs73063039	0.0624227	0.979328	-0.480805	1.36807e-05	0.17653	NA	NA	88.5089
rs147366834	0.111275	0.983065	0.441351	1.26001e-07	0.639435	NA	NA	79.8644
rs34362304.1	-0.0036794	0.996422	0.0842783	3.54736e-06	0.519008	NA	NA	95.8169

## Sheet: ListSort
SNP	Direct Effect	P-value of DE	Indirect effect	p-value of beta_k	p-value of alpha_k	p-value of beta_l	p-value of alpha_l	Percentage of Global effect explained by connectome
rs113713560	-11.4052	0.00740385	0.131403	1.09726e-05	0.835579	NA	NA	1.139
rs13306653	-1.79919	0.0100047	0.186137	1.60816e-05	0.068029	NA	NA	9.37564
rs5723.COSV55599716	-1.79919	0.0100047	0.186137	1.60816e-05	0.068029	NA	NA	9.37564
rs5729	-1.79919	0.0100047	0.186137	1.60816e-05	0.068029	NA	NA	9.37564
rs9922448	-1.79919	0.0100047	0.186137	1.60816e-05	0.068029	NA	NA	9.37564
rs4877985	4.13974	0.012038	-0.133704	1.75342e-05	0.576656	NA	NA	3.12873
rs111660869	5.44484	0.0178353	-0.608015	1.3649e-05	0.0724502	NA	NA	10.0451
rs7656250	1.47127	0.0211524	-0.0522612	7.8053e-06	0.588138	NA	NA	3.43026
rs72814539	-3.13603	0.0228581	-0.0225644	2.11001e-06	0.918632	NA	NA	0.71438
rs114834396	6.84868	0.0271263	-0.249616	6.79723e-06	0.596728	NA	NA	3.51657
rs144113658	4.52552	0.0302491	-0.0393008	1.35915e-05	0.898285	NA	NA	0.860948
rs77398130	5.53731	0.0329479	-0.66548	1.66939e-05	0.0788058	NA	NA	10.7287
rs115195951	6.43287	0.0341189	-0.234041	8.5171e-06	0.608815	NA	NA	3.51048
rs77769808	3.63038	0.0361386	-0.128064	1.33097e-05	0.616004	NA	NA	3.40738
rs145458445	-7.80115	0.0383141	1.09973	1.26647e-06	0.0747945	NA	NA	12.3553
rs145529594	-7.79101	0.0386324	1.0868	1.27539e-06	0.0784603	NA	NA	12.2417
rs9568202	2.42819	0.0393053	-0.0861772	1.33575e-05	0.619641	NA	NA	3.4274
rs72773968.COSV99031664	2.02711	0.039325	0.165735	1.31046e-05	0.25349	NA	NA	7.55799
rs72773968.COSV99031664.1	2.02711	0.039325	0.165735	1.31046e-05	0.25349	NA	NA	7.55799
rs76108164	5.87168	0.0423131	-0.770537	7.19903e-06	0.0795296	NA	NA	11.6006
rs114357990	10.0888	0.0460821	-1.35011	6.56972e-06	0.0802897	NA	NA	11.8028
rs7880476	-1.02473	0.0472903	-0.0116821	7.98724e-07	0.892146	NA	NA	1.12717
rs72773947	1.97376	0.0485314	0.163388	1.11475e-05	0.272805	NA	NA	7.64516
rs117384094	-7.01376	0.0493497	0.0730251	7.71435e-07	0.902589	NA	NA	1.03044
rs56319744	1.96608	0.0494844	0.158923	1.01723e-05	0.288143	NA	NA	7.47874
rs72553952	-7.39653	0.0510364	0.357618	1.21035e-06	0.565554	NA	NA	4.61196
X8.10622924.TTTC.T	8.39639	0.052158	-1.08351	1.98198e-06	0.0852192	1.53593e-06	0.761423	11.4296
rs72773922	1.93481	0.0531459	0.171434	1.2867e-05	0.246048	NA	NA	8.13933
rs72773923	1.93481	0.0531459	0.171434	1.2867e-05	0.246048	NA	NA	8.13933
rs72773932	1.93481	0.0531459	0.171434	1.2867e-05	0.246048	NA	NA	8.13933
rs11750934	1.93481	0.0531459	0.171434	1.2867e-05	0.246048	NA	NA	8.13933
rs11738810	1.93481	0.0531459	0.171434	1.2867e-05	0.246048	NA	NA	8.13933
rs11748519	1.93481	0.0531459	0.171434	1.2867e-05	0.246048	NA	NA	8.13933
rs11743410	1.93481	0.0531459	0.171434	1.2867e-05	0.246048	NA	NA	8.13933
rs10515249	1.93481	0.0531459	0.171434	1.2867e-05	0.246048	NA	NA	8.13933
rs72773924	1.93485	0.0533264	0.171638	1.27432e-05	0.246352	NA	NA	8.14807
rs116202570	8.83444	0.0559778	-0.490063	1.54088e-08	0.578391	NA	NA	5.25564
rs79270317	8.04974	0.0630484	-0.284935	1.19117e-05	0.657314	NA	NA	3.41867
rs28449551	-10.2692	0.0677856	0.0793279	1.2583e-05	0.924052	NA	NA	0.766564
rs141023519	-3.7723	0.0715616	-0.361852	1.21442e-05	0.243609	NA	NA	8.75276
rs565615420	-19.6062	0.0767733	0.365608	5.56905e-06	0.831233	NA	NA	1.83062
rs79021915	-7.70356	0.0771578	-0.794665	3.92555e-06	0.24311	NA	NA	9.35096
rs4468946	-1.53149	0.0803475	0.00800581	1.74775e-05	0.949877	NA	NA	0.520029
rs17176375	1.79761	0.0809601	-0.0108746	9.41037e-06	0.943872	NA	NA	0.601308
rs115260164	-4.01137	0.081258	-0.044504	1.51946e-05	0.0865641	3.58568e-07	0.175349	1.09727
rs41303348	-19.2087	0.0825567	0.130801	5.14553e-06	0.938911	NA	NA	0.67634
rs200749025	-19.2087	0.0825567	0.130801	5.14553e-06	0.938911	NA	NA	0.67634
rs147526482	-19.2087	0.0825567	0.130801	5.14553e-06	0.938911	NA	NA	0.67634
rs201288428.COSV55830330	-19.2087	0.0825567	0.130801	5.14553e-06	0.938911	NA	NA	0.67634
rs150470903	-19.2087	0.0825567	0.130801	5.14553e-06	0.938911	NA	NA	0.67634
rs145975508.COSV61734445	-19.2087	0.0825567	0.130801	5.14553e-06	0.938911	NA	NA	0.67634
rs199968197	-19.2087	0.0825567	0.130801	5.14553e-06	0.938911	NA	NA	0.67634
rs149736299	-19.2087	0.0825567	0.130801	5.14553e-06	0.938911	NA	NA	0.67634
X15.45412400.GAGA.G	-19.2087	0.0825567	0.130801	5.14553e-06	0.938911	NA	NA	0.67634
rs368081185.COSV60889751	-19.2087	0.0825567	0.130801	5.14553e-06	0.938911	NA	NA	0.67634
rs144333393	-19.2087	0.0825567	0.130801	5.14553e-06	0.938911	NA	NA	0.67634
rs539897980	-19.2087	0.0825567	0.130801	5.14553e-06	0.938911	NA	NA	0.67634
rs141623013.COSV100652098	-19.2087	0.0825567	0.130801	5.14553e-06	0.938911	NA	NA	0.67634
rs773905945.COSV51657690	-19.2183	0.082579	0.135686	5.16927e-06	0.936694	NA	NA	0.701073
rs145087122	-19.1918	0.0829404	0.129779	5.20932e-06	0.939411	NA	NA	0.671679
rs28730722.COSV54862081	-19.1981	0.0830495	0.119684	5.32261e-06	0.944131	NA	NA	0.619552
rs138637165.CM1611198	-19.1908	0.0831331	0.121405	5.32608e-06	0.943321	NA	NA	0.628644
rs117100657	-19.2044	0.0832488	0.202905	5.29182e-06	0.905707	NA	NA	1.04551
rs148475876	-19.1373	0.0836377	0.0523221	5.1413e-06	0.975553	NA	NA	0.272658
rs17402704	1.71014	0.090343	0.174721	1.72688e-05	0.234866	NA	NA	9.2697
rs1990985	4.53705	0.0946993	-0.80003	4.3727e-07	0.0845974	NA	NA	14.99
rs113673946	3.50183	0.0970759	-0.517178	1.80244e-05	0.0917554	NA	NA	12.8683
rs76311122	-2.88584	0.0977185	-0.306092	1.64947e-05	0.228702	NA	NA	9.58953
rs148635749	-5.43096	0.100679	-0.697187	5.61886e-07	0.21452	NA	NA	11.3768
rs138024882	-9.40323	0.105045	-1.11019	1.58041e-06	0.238693	NA	NA	10.5598
rs76363034	-9.40323	0.105045	-1.11019	1.58041e-06	0.238693	NA	NA	10.5598
rs76356005	-8.12188	0.107521	0.0446739	5.04028e-06	0.954282	NA	NA	0.547034
rs10437747	1.79098	0.109134	-0.00968834	5.06607e-06	0.955232	NA	NA	0.53804
rs149276357	5.08083	0.111324	0.00580819	4.72667e-07	0.991469	NA	NA	0.114185
rs118120551	6.89889	0.111761	-1.05723	1.38645e-05	0.0985306	NA	NA	13.2882
rs17134784	-3.27651	0.113368	0.190709	6.71563e-07	0.583318	NA	NA	5.50035
rs138951419	7.31871	0.114821	-0.295536	1.06527e-05	0.6693	NA	NA	3.88136
rs148919436	-10.4174	0.115391	-1.31519	5.37992e-07	0.240854	NA	NA	11.2097
rs77661219	-10.4174	0.115391	-1.31519	5.37992e-07	0.240854	NA	NA	11.2097
rs79152278	-4.28584	0.116001	0.242276	1.1892e-06	0.588566	NA	NA	5.35047
rs11914543	2.81574	0.116645	-0.132657	1.15864e-06	0.65303	NA	NA	4.49929
rs73814310	-0.937501	0.124962	0.0287123	1.24134e-05	0.754165	NA	NA	2.97164
rs114006288	1.68041	0.125881	0.284981	6.05568e-06	0.102386	NA	NA	14.5
rs116785568	-8.53731	0.128862	0.537902	2.31679e-07	0.584007	NA	NA	5.92716
rs56173940	-2.2791	0.129514	0.131493	1.16059e-06	0.594766	NA	NA	5.45481
rs17171504	1.48484	0.13141	-0.00773767	2.4719e-06	0.960654	NA	NA	0.518411
rs117830285	-9.88549	0.134469	-1.18029	1.12442e-05	0.229908	NA	NA	10.6661
rs12424587	5.46091	0.134573	-0.905356	1.11944e-05	0.0955952	NA	NA	14.2211
rs3760739	-0.856842	0.135125	0.140034	1.48367e-05	0.0961836	NA	NA	14.0473
rs864821	1.36387	0.137387	-0.0543126	1.82785e-05	0.683537	NA	NA	3.82974
rs12294553	4.01751	0.144989	-0.728093	3.08009e-06	0.094538	NA	NA	15.3425
rs9409438	-1.21351	0.15335	-0.154044	1.48403e-05	0.216766	NA	NA	11.2642
imm_16_73950632	0.802928	0.155696	-0.0681396	4.83081e-07	0.478875	NA	NA	7.82254
rs17128467	1.77046	0.157725	0.042914	1.30542e-06	0.834352	NA	NA	2.36652
rs12427819	1.98768	0.159266	0.0532906	3.4945e-08	0.839337	NA	NA	2.61104
rs139077812.COSV99056053	-8.93111	0.162992	0.0308465	2.70777e-06	0.975786	NA	NA	0.344194
imm_16_73901977	0.785827	0.166532	-0.0694829	2.94927e-07	0.480208	NA	NA	8.12371
rs10514393	0.785827	0.166532	-0.0694829	2.94927e-07	0.480208	NA	NA	8.12371
COSV52212082	0.775068	0.170585	-0.061926	1.25787e-06	0.504932	NA	NA	7.39862
rs141944886	7.6663	0.172809	-1.41937	6.80564e-06	0.0979899	NA	NA	15.6221
rs139966602	4.06282	0.172976	-0.195039	2.153e-06	0.683577	NA	NA	4.58067
imm_16_73960563	0.771443	0.17647	-0.0670206	5.68069e-07	0.488182	NA	NA	7.99326
imm_16_73917597	0.758359	0.177572	-0.0618141	2.03979e-06	0.494049	NA	NA	7.53672
rs138291117	8.65248	0.181208	-1.60121	8.96328e-06	0.10011	NA	NA	15.6159
imm_16_73893931	0.753036	0.181935	-0.0583885	8.44411e-07	0.535716	NA	NA	7.1958
rs115054514	3.07844	0.182268	-0.070418	6.1242e-06	0.630118	5.31737e-07	0.785219	2.2363
imm_16_74046436	0.74606	0.187623	-0.0594919	1.39015e-06	0.520107	NA	NA	7.38523
rs62443591	1.36365	0.190165	0.003059	9.78127e-06	0.984349	NA	NA	0.223822
rs201135092	1.74726	0.192366	-0.0788327	7.93735e-06	0.697358	NA	NA	4.31701
rs79720263	3.30808	0.194418	-0.145273	1.19205e-05	0.700795	NA	NA	4.20672
rs8052308	-2.1639	0.196047	-0.315042	8.5727e-06	0.211801	NA	NA	12.7087
rs9409617	-1.07787	0.196561	-0.15721	8.46897e-06	0.211769	NA	NA	12.7287
rs113368918	4.70206	0.197606	-0.197301	9.28941e-06	0.718892	NA	NA	4.02707
JHU_16.75331043	0.722778	0.198216	-0.0593199	2.21984e-06	0.509849	NA	NA	7.58472
imm_16_73888545	0.722778	0.198216	-0.0593199	2.21984e-06	0.509849	NA	NA	7.58472
imm_16_73889068	0.71385	0.203507	-0.0606218	2.01326e-06	0.501839	NA	NA	7.82749
imm_16_74040633	0.719614	0.203546	-0.0619993	1.53867e-06	0.500478	NA	NA	7.93223
imm_16_74035948	0.718864	0.204159	-0.062671	1.2506e-06	0.499613	NA	NA	8.01896
rs146207088	-10.1569	0.204279	-1.46632	1.09122e-05	0.219255	NA	NA	12.6155
rs148968284	-10.1458	0.204458	-1.49022	1.12292e-05	0.210622	NA	NA	12.807
rs79677861	-10.1352	0.204724	-1.49327	1.11179e-05	0.209444	NA	NA	12.8415
rs147420971	-10.1352	0.204724	-1.49327	1.11179e-05	0.209444	NA	NA	12.8415
rs117925630	-10.1352	0.204724	-1.49327	1.11179e-05	0.209444	NA	NA	12.8415
rs117455202	-10.1352	0.204724	-1.49327	1.11179e-05	0.209444	NA	NA	12.8415
rs141672178	-10.1352	0.204724	-1.49327	1.11179e-05	0.209444	NA	NA	12.8415
imm_16_74028077	0.713986	0.20497	-0.0596385	1.94146e-06	0.511135	NA	NA	7.70897
rs57519512	3.21231	0.21174	0.0302739	4.69889e-07	0.94491	NA	NA	0.933634
rs79930079	9.75493	0.212773	-0.456744	6.44006e-06	0.702495	NA	NA	4.47276
imm_16_73897732	0.702658	0.213967	-0.0659611	3.7959e-07	0.497099	NA	NA	8.58176
rs28667046	-0.961012	0.215057	-0.000916646	1.24267e-05	0.993625	NA	NA	0.0952926
rs8009460	2.42014	0.217518	0.0842275	3.71576e-06	0.78403	NA	NA	3.36322
rs76318746	7.93055	0.220004	-1.64513	4.21992e-06	0.102511	NA	NA	17.1803
rs143037153	7.93055	0.220004	-1.64513	4.21992e-06	0.102511	NA	NA	17.1803
imm_16_73950307	0.692693	0.221392	-0.0617728	6.20627e-07	0.51886	NA	NA	8.18761
imm_16_73886981	0.682524	0.222773	-0.0613952	1.45516e-06	0.501737	NA	NA	8.25294
rs59285907	3.51284	0.224375	-0.157129	1.46196e-05	0.711255	NA	NA	4.28147
rs145873923	7.85149	0.225128	-0.35238	1.41275e-05	0.711249	NA	NA	4.29528
imm_16_73886092	0.678648	0.225416	-0.0602152	1.65612e-06	0.507016	NA	NA	8.1497
imm_16_73923590	0.67933	0.226582	-0.0587302	8.74253e-07	0.530628	NA	NA	7.95736
imm_16_73929421	0.676633	0.231122	-0.0647418	4.37143e-07	0.502349	NA	NA	8.73267
imm_16_73876147	0.666247	0.237606	-0.0597424	1.92232e-06	0.510993	NA	NA	8.2291
imm_16_73878328	0.666247	0.237606	-0.0597424	1.92232e-06	0.510993	NA	NA	8.2291
rs111870807	2.82647	0.23775	-0.594929	3.94414e-06	0.112458	NA	NA	17.3885
rs35508255	3.37784	0.238702	-0.702936	8.03796e-06	0.105046	NA	NA	17.2256
imm_16_73989835	0.663458	0.241264	-0.0622404	8.91445e-07	0.508365	NA	NA	8.57662
rs114744690	4.37909	0.242853	-0.212576	6.14826e-06	0.711112	NA	NA	4.62959
imm_16_73989891	0.657606	0.24417	-0.0630972	6.16981e-07	0.507477	NA	NA	8.75495
rs2203088	-0.602817	0.244855	0.0289537	7.41239e-06	0.712802	NA	NA	4.58294
rs1489672	-0.617375	0.245579	-0.00359911	1.06352e-05	0.963985	NA	NA	0.57959
imm_16_74006422	0.657359	0.246311	-0.062503	9.68555e-07	0.506546	NA	NA	8.68264
rs9342351	0.944826	0.247661	-0.194827	1.31818e-05	0.106501	NA	NA	17.0953
imm_16_73954382	0.649623	0.249739	-0.0604678	1.33575e-06	0.512438	NA	NA	8.5155
imm_16_73980261	0.649623	0.249739	-0.0604678	1.33575e-06	0.512438	NA	NA	8.5155
rs142628952	2.36106	0.251647	-0.524418	3.54194e-06	0.104958	NA	NA	18.1744
imm_16_73983054	0.64437	0.252499	-0.0613762	9.20573e-07	0.511462	NA	NA	8.69663
rs6546272	0.646171	0.256673	0.00221086	1.78321e-05	0.978698	NA	NA	0.340981
imm_16_73929245	0.642823	0.25686	-0.0602643	1.43115e-06	0.514565	NA	NA	8.57138
imm_16_73889073	0.636513	0.257387	-0.0631955	4.56503e-07	0.509656	NA	NA	9.0317
imm_16_73980404	0.638574	0.259206	-0.0602558	9.52727e-07	0.520994	NA	NA	8.62238
imm_16_73870986	0.637253	0.259302	-0.0583439	2.40726e-06	0.517556	NA	NA	8.3876
imm_16_73889836	0.633927	0.259972	-0.0630729	5.52489e-07	0.508257	NA	NA	9.04919
imm_16_73966482	0.635854	0.261223	-0.0598101	2.29771e-06	0.508952	NA	NA	8.59755
rs4707795	0.763642	0.265469	-0.176304	2.69853e-06	0.105724	NA	NA	18.7568
imm_16_73954492	0.626472	0.265783	-0.0642364	2.98945e-07	0.510059	NA	NA	9.30007
imm_16_73954788	0.626472	0.265783	-0.0642364	2.98945e-07	0.510059	NA	NA	9.30007
imm_16_73955753	0.626391	0.266128	-0.0642452	3.0714e-07	0.510078	NA	NA	9.30233
rs112533857	3.68123	0.268302	-0.830022	5.35973e-06	0.105834	NA	NA	18.3989
rs79547784	-5.59645	0.268379	-0.0289527	1.36355e-05	0.969016	NA	NA	0.514677
rs16866524	-0.917405	0.269099	0.202931	7.45095e-06	0.107362	NA	NA	18.1134
rs182225157	-7.3057	0.269754	-1.3768	1.01357e-06	0.208685	NA	NA	15.8572
imm_16_73942919	0.619982	0.275038	-0.0536985	1.98805e-06	0.557254	NA	NA	7.97092
imm_16_73951649	0.612358	0.275839	-0.0599433	2.93578e-07	0.538506	NA	NA	8.91614
rs6079722	-0.812146	0.27667	-0.142443	8.7406e-06	0.205554	NA	NA	14.922
imm_16_74003106	0.615177	0.278414	-0.0611178	5.89886e-07	0.525426	NA	NA	9.03715
rs147531239.COSV104570516	6.02164	0.27934	-1.31802	1.31502e-05	0.108924	NA	NA	17.9574
rs13188025	2.37984	0.280635	-0.115743	1.09732e-05	0.724587	NA	NA	4.63793
rs111509066	-2.68142	0.282266	-0.0124309	1.53042e-05	0.972854	NA	NA	0.461454
rs35263058	0.605848	0.283043	-0.0615881	6.19471e-07	0.51743	NA	NA	9.22756
imm_16_73951900	0.605761	0.283398	-0.0615945	6.35611e-07	0.517462	NA	NA	9.22963
imm_16_73894180	0.603269	0.284485	-0.060933	7.39683e-07	0.518517	NA	NA	9.17386
rs117676762	-6.11877	0.285827	-1.17237	2.04823e-06	0.203584	NA	NA	16.0794
rs79993170	-0.985156	0.294397	-0.0036699	2.67768e-06	0.980384	NA	NA	0.371137
imm_16_73973332	0.591356	0.294606	-0.0567916	2.6832e-06	0.526357	NA	NA	8.76215
imm_16_73883434	0.585945	0.297564	-0.0619944	4.21222e-07	0.519386	NA	NA	9.56794
rs77776973	-3.46347	0.298457	-0.646164	8.53771e-06	0.198355	NA	NA	15.7232
imm_16_73877217	0.586125	0.298503	-0.0614101	5.34429e-07	0.520555	NA	NA	9.48368
imm_16_73878532	0.585968	0.298633	-0.0618925	4.51926e-07	0.51992	NA	NA	9.55337
imm_16_73880074	0.585968	0.298633	-0.0618925	4.51926e-07	0.51992	NA	NA	9.55337
imm_16_73881341	0.585968	0.298633	-0.0618925	4.51926e-07	0.51992	NA	NA	9.55337
imm_16_73953278	0.588304	0.298832	-0.0624378	3.88023e-07	0.520691	NA	NA	9.59487
rs538287	0.583669	0.302142	0.0088091	1.60709e-05	0.915515	NA	NA	1.48682
imm_16_74029923	0.573046	0.304358	-0.0549895	3.58961e-06	0.529787	NA	NA	8.75579
rs8082814	-1.95041	0.307558	0.148319	6.31865e-07	0.645452	NA	NA	7.06707
imm_16_73993732	0.577062	0.308721	-0.0637995	3.80004e-07	0.512942	NA	NA	9.95528
rs191353566	5.63871	0.309141	-0.290545	7.59786e-06	0.729556	NA	NA	4.9002
rs60716510	-2.43308	0.309271	-0.115702	3.22443e-06	0.758992	NA	NA	4.53951
COSV52210893	0.579692	0.309966	-0.0546932	7.3912e-07	0.570169	NA	NA	8.62144
rs557069225	3.41631	0.310576	-0.784848	1.65074e-05	0.110874	NA	NA	18.6817
imm_16_73971877	0.57	0.310685	-0.0582662	8.28722e-07	0.534414	NA	NA	9.27412
imm_16_74008671	0.572212	0.31219	-0.0605305	4.2406e-07	0.532118	NA	NA	9.56638
rs147847023	5.00306	0.312255	-0.0971347	6.37279e-06	0.900034	NA	NA	1.90453
imm_16_73872130	0.571677	0.312742	-0.07035	3.64573e-07	0.470858	NA	NA	10.9575
rs151024901	3.9025	0.312797	-0.895595	1.74268e-05	0.111701	NA	NA	18.6656
imm_16_74000684	0.570654	0.31356	-0.0583503	5.28037e-07	0.543732	NA	NA	9.27661
imm_16_74033864	0.566054	0.313624	-0.0569678	1.91476e-06	0.52918	NA	NA	9.14379
imm_16_74033952	0.566054	0.313624	-0.0569678	1.91476e-06	0.52918	NA	NA	9.14379
imm_16_74019582	0.564905	0.315217	-0.0581343	8.30493e-07	0.535464	NA	NA	9.33077
imm_16_74001317	0.566565	0.315846	-0.0601322	3.84938e-07	0.535321	NA	NA	9.59509
imm_16_74006677	0.56707	0.317055	-0.0619015	4.03814e-07	0.523817	NA	NA	9.84171
JHU_16.75422816	0.56496	0.317435	-0.0643924	3.88575e-07	0.506854	NA	NA	10.2315
imm_16_73990575	0.56396	0.318691	-0.0687696	3.85729e-07	0.478898	NA	NA	10.8687
rs76401327	1.56328	0.318722	-0.0829817	1.5142e-05	0.718183	NA	NA	5.04061
rs145681254	-3.66474	0.319274	0.23979	1.41975e-06	0.690592	NA	NA	6.14132
imm_16_73945935	0.563714	0.319625	-0.058064	9.19424e-07	0.537184	NA	NA	9.33839
imm_16_73994214	0.56473	0.319837	-0.0562487	8.01283e-07	0.553472	NA	NA	9.05808
COSV52210145	0.563198	0.320262	-0.0621634	3.56862e-07	0.524102	NA	NA	9.94038
imm_16_73985598	0.561175	0.321206	-0.0618483	3.75727e-07	0.524504	NA	NA	9.92713
imm_16_73985807	0.561175	0.321206	-0.0618483	3.75727e-07	0.524504	NA	NA	9.92713
imm_16_73995970	0.561175	0.321206	-0.0618483	3.75727e-07	0.524504	NA	NA	9.92713
imm_16_73999861	0.561175	0.321206	-0.0618483	3.75727e-07	0.524504	NA	NA	9.92713
imm_16_74007540	0.561175	0.321206	-0.0618483	3.75727e-07	0.524504	NA	NA	9.92713
imm_16_74011905	0.561133	0.321524	-0.0618875	3.88368e-07	0.524214	NA	NA	9.93347
COSV52211687	0.559545	0.321695	-0.0588923	6.38324e-07	0.53591	NA	NA	9.52277
imm_16_74003176	0.560801	0.322155	-0.0619624	3.66807e-07	0.524881	NA	NA	9.94958
imm_16_73989331	0.559966	0.322455	-0.05994	3.79727e-07	0.537623	NA	NA	9.66922
imm_16_74024197	0.553638	0.322747	-0.0564583	1.59813e-06	0.534815	NA	NA	9.25401
imm_16_73958247	0.559037	0.323015	-0.0611633	4.67126e-07	0.525737	NA	NA	9.86186
imm_16_74012949	0.558135	0.323249	-0.0576696	6.32286e-07	0.544832	NA	NA	9.36493
imm_16_74019330	0.554019	0.324227	-0.0594251	7.38476e-07	0.527754	NA	NA	9.68713
imm_16_74020214	0.554019	0.324227	-0.0594251	7.38476e-07	0.527754	NA	NA	9.68713
imm_16_73950853	0.557251	0.324708	-0.0620423	4.80061e-07	0.519745	NA	NA	10.0182
rs12232572	-2.08659	0.326052	0.114768	3.76676e-06	0.730011	NA	NA	5.21353
rs117950089	-5.54621	0.327249	-0.0208587	7.0377e-06	0.980689	NA	NA	0.37468
imm_16_74028487	0.544689	0.328787	-0.0552029	2.61847e-06	0.533733	NA	NA	9.20214
imm_16_73994062	0.551402	0.329311	-0.0539925	6.77089e-07	0.56991	NA	NA	8.91857
rs190535783	-3.28881	0.329558	-0.642004	1.59531e-05	0.193142	NA	NA	16.3326
imm_16_74024348	0.544917	0.329915	-0.0569847	1.47569e-06	0.531692	NA	NA	9.46744
imm_16_73980318	0.548398	0.331014	-0.0601914	5.65981e-07	0.528263	NA	NA	9.89031
imm_16_73985697	0.548398	0.331014	-0.0601914	5.65981e-07	0.528263	NA	NA	9.89031
imm_16_73999644	0.548398	0.331014	-0.0601914	5.65981e-07	0.528263	NA	NA	9.89031
imm_16_73999645	0.548398	0.331014	-0.0601914	5.65981e-07	0.528263	NA	NA	9.89031
COSV52209447	0.550492	0.331421	-0.0623522	5.62451e-07	0.515862	NA	NA	10.1742
imm_16_73969763	0.545904	0.334425	-0.0583237	1.47095e-06	0.527481	NA	NA	9.6526
imm_16_73870049	0.544469	0.334919	-0.0524821	3.60594e-06	0.553662	NA	NA	8.79169
imm_16_73988310	0.542732	0.33681	-0.048749	9.04079e-07	0.604391	NA	NA	8.24186
imm_16_73993232	0.543092	0.337319	-0.0625862	4.06466e-07	0.518839	NA	NA	10.3332
JHU_16.75442142	0.539583	0.339715	-0.0605125	8.01291e-07	0.521503	NA	NA	10.0838
imm_16_73981655	0.536229	0.34114	-0.0579319	1.08731e-06	0.532933	NA	NA	9.75021
imm_16_73962475	0.536336	0.3424	-0.058638	8.864e-07	0.532437	NA	NA	9.85556
imm_16_73975421	0.534721	0.343587	-0.0610202	6.26874e-07	0.521543	NA	NA	10.2427
rs189345325	4.76182	0.344036	-0.28733	3.39244e-06	0.717166	NA	NA	5.69065
COSV52208992	0.529056	0.349083	-0.0603565	4.47759e-07	0.531395	NA	NA	10.2401
COSV52210879	0.527493	0.351073	-0.0577088	1.15285e-06	0.535262	NA	NA	9.86136
imm_16_73968946	0.527493	0.351073	-0.0577088	1.15285e-06	0.535262	NA	NA	9.86136
imm_16_73969022	0.527493	0.351073	-0.0577088	1.15285e-06	0.535262	NA	NA	9.86136
imm_16_73969120	0.527493	0.351073	-0.0577088	1.15285e-06	0.535262	NA	NA	9.86136
imm_16_73970408	0.527493	0.351073	-0.0577088	1.15285e-06	0.535262	NA	NA	9.86136
imm_16_73960625	0.527442	0.3514	-0.0577426	1.19078e-06	0.534964	NA	NA	9.86742
imm_16_73942660	0.526622	0.35456	-0.0594305	8.86694e-07	0.530015	NA	NA	10.1408
imm_16_73999114	0.523959	0.355138	-0.0632428	4.71198e-07	0.512612	NA	NA	10.7702
rs117225291	-2.0286	0.359458	-0.0187501	1.74285e-05	0.953588	NA	NA	0.915823
rs114047728	6.06843	0.363541	0.135548	1.03957e-08	0.916308	NA	NA	2.18486
rs117237153	-5.07368	0.365263	-1.11053	7.4109e-06	0.191846	NA	NA	17.9575
rs147366834	-5.0822	0.366417	0.444874	1.26001e-07	0.657932	NA	NA	8.049
rs76566630	-1.25659	0.371415	-0.27126	1.23688e-05	0.192994	NA	NA	17.7544
imm_16_73973276	0.496776	0.378292	-0.0585129	7.43495e-07	0.535602	NA	NA	10.5374
rs17013105	4.42066	0.379598	-1.19676	8.31814e-06	0.11552	NA	NA	21.3044
rs150475809	-5.66223	0.384837	-1.25342	1.63548e-05	0.187885	NA	NA	18.1244
rs73981631	2.15642	0.385071	-0.117162	1.32364e-05	0.749129	NA	NA	5.15318
imm_16_73968664	0.491602	0.386393	-0.0622547	1.81923e-06	0.497804	NA	NA	11.2402
rs61733089	3.27117	0.387	-0.933832	3.76039e-06	0.114923	NA	NA	22.2076
rs150977137	5.52635	0.39216	-0.316968	1.80518e-05	0.73564	NA	NA	5.42445
rs116866072	-3.96935	0.393102	-0.894775	1.66944e-05	0.187104	NA	NA	18.3954
JHU_4.102594138	0.444755	0.400383	-0.0312698	1.46307e-05	0.688573	NA	NA	6.56895
rs144465232	-6.74082	0.400452	-1.87263	5.58309e-07	0.168783	NA	NA	21.7408
imm_16_73943850	0.477854	0.401113	-0.0563834	1.25993e-06	0.545703	NA	NA	10.554
rs4888383	0.477854	0.401113	-0.0563834	1.25993e-06	0.545703	NA	NA	10.554
rs372042	0.632388	0.402046	-0.0374952	1.56179e-05	0.734398	NA	NA	5.59728
imm_16_74041307	0.463437	0.407143	-0.0553512	1.20306e-06	0.546721	NA	NA	10.6693
rs116324835	2.19819	0.407838	-0.617742	1.17266e-05	0.117422	NA	NA	21.9374
rs72789334	-0.847101	0.410629	0.0730017	1.19503e-06	0.666255	NA	NA	7.93409
JHU_11.41911004	0.458138	0.411327	0.103259	8.81494e-06	0.220168	NA	NA	18.3932
rs146800096	-6.57379	0.412031	-1.77626	4.45918e-07	0.194322	NA	NA	21.2724
rs751917604	-6.57379	0.412031	-1.77626	4.45918e-07	0.194322	NA	NA	21.2724
rs75101611	-6.57379	0.412031	-1.77626	4.45918e-07	0.194322	NA	NA	21.2724
rs202186196	-6.57379	0.412031	-1.77626	4.45918e-07	0.194322	NA	NA	21.2724
rs142160957	-6.57379	0.412031	-1.77626	4.45918e-07	0.194322	NA	NA	21.2724
rs148784679	-6.57379	0.412031	-1.77626	4.45918e-07	0.194322	NA	NA	21.2724
rs76347993	-6.57436	0.412462	-1.76154	4.45874e-07	0.199007	NA	NA	21.132
rs11857175	0.799025	0.413118	-0.069065	6.29977e-07	0.674593	NA	NA	7.95597
imm_16_73992379	0.467629	0.413693	-0.0505838	5.56694e-07	0.606074	NA	NA	9.76121
rs76994284	-6.55283	0.41373	-1.7999	4.47649e-07	0.188841	NA	NA	21.5487
rs150123805	4.69182	0.414893	0.135598	4.77347e-09	0.905017	NA	NA	2.80891
rs17686457	0.4617	0.415257	-0.0270998	7.43124e-06	0.752687	NA	NA	5.54415
rs1408282	0.699684	0.417684	-0.196085	1.7829e-05	0.118459	NA	NA	21.8901
rs16938394	-1.54179	0.418905	-0.374931	1.16752e-05	0.185804	NA	NA	19.5611
rs4457736	-1.54179	0.418905	-0.374931	1.16752e-05	0.185804	NA	NA	19.5611
rs4580909	-1.15063	0.424378	-0.0155568	1.22481e-05	0.941913	NA	NA	1.33399
JHU_8.88692399	0.47962	0.428692	-0.0286077	7.61851e-06	0.755474	NA	NA	5.62892
rs535474272	-1.52284	0.430334	-0.398574	4.55582e-06	0.185307	NA	NA	20.7438
rs112530541	2.36592	0.432789	-0.726781	9.47253e-06	0.109894	NA	NA	23.4998
imm_16_73958614	0.449507	0.433956	-0.0676777	7.8723e-07	0.497244	NA	NA	13.0858
rs77205182	1.37388	0.437355	-0.0836889	6.57715e-06	0.756584	NA	NA	5.74167
rs10824740.COSV57889469	0.447869	0.440846	0.00427949	6.35094e-06	0.961598	NA	NA	0.946479
rs10824740.COSV57889469.1	0.445643	0.442859	0.00658144	6.62583e-06	0.940788	NA	NA	1.45535
rs73063039	1.94814	0.451421	-0.590849	1.36807e-05	0.121576	NA	NA	23.2711
imm_16_73963380	0.423921	0.454218	-0.0500319	1.08218e-06	0.593009	NA	NA	10.5563
rs73624941	1.45355	0.456791	-0.072105	1.20108e-05	0.803526	NA	NA	4.72618
rs4756680	0.413169	0.458123	0.114063	4.31832e-06	0.188489	NA	NA	21.6343
rs28688016	2.18232	0.46234	-0.836206	1.06547e-07	0.117088	NA	NA	27.7025
rs151079256	-3.36016	0.464117	-0.0540118	1.83408e-06	0.941896	NA	NA	1.58199
rs114474404	3.69891	0.464575	-1.34832	4.58338e-07	0.118244	NA	NA	26.7141
rs190073949	4.71552	0.465626	-0.375601	8.61722e-07	0.727149	NA	NA	7.37756
rs192482164	4.12342	0.468785	-1.51215	5.08492e-07	0.11828	NA	NA	26.8323
rs117711504	4.67357	0.469566	-0.334834	8.67307e-07	0.755546	NA	NA	6.68544
rs5921578	0.690658	0.474009	0.0265233	2.60985e-08	0.883665	NA	NA	3.69827
imm_1_153369771	0.400421	0.474499	-0.0367167	1.22682e-06	0.689511	NA	NA	8.39933
rs72857725	1.46053	0.48533	0.119084	2.17548e-06	0.722672	NA	NA	7.53882
rs11121727	-1.17836	0.49823	0.415614	5.10631e-06	0.122131	NA	NA	26.0741
rs11121727.1	-1.17836	0.49823	0.415614	5.10631e-06	0.122131	NA	NA	26.0741
rs115737163	1.10255	0.499591	0.0219559	5.19485e-06	0.930566	NA	NA	1.9525
rs872241	0.376148	0.499623	-0.127184	1.27267e-05	0.122929	NA	NA	25.2684
rs115117038	2.56291	0.506222	0.112457	6.66196e-08	0.87296	NA	NA	4.20343
COSV62923459	0.365252	0.51366	-0.0535528	8.53434e-07	0.565278	NA	NA	12.7871
imm_16_73972842	0.368431	0.515182	-0.0478473	1.32533e-06	0.606761	NA	NA	11.4941
rs11572851	1.31123	0.51991	-0.48814	6.29384e-06	0.118178	NA	NA	27.1283
rs77648144	-1.35964	0.521787	-0.421913	1.37566e-05	0.1774	NA	NA	23.6824
rs139978877	4.99516	0.526541	-1.86358	5.86237e-06	0.123885	NA	NA	27.1709
rs78337173	-0.910971	0.527531	-0.0209673	1.73443e-05	0.920485	NA	NA	2.24986
rs78337173.1	-0.908109	0.528676	-0.0209508	1.71474e-05	0.920519	NA	NA	2.25506
rs149175148	-4.97607	0.528844	-0.114898	1.66971e-05	0.920592	NA	NA	2.25689
rs117392134	5.01851	0.530154	-0.372578	1.00567e-05	0.755513	NA	NA	6.91099
rs138843033	-3.57308	0.530244	-0.0825817	2.12676e-06	0.927967	NA	NA	2.25901
rs141668738	4.99904	0.531565	-0.34086	1.00014e-05	0.775576	NA	NA	6.38327
rs117389913	4.99904	0.531565	-0.34086	1.00014e-05	0.775576	NA	NA	6.38327
rs117131205	4.99904	0.531565	-0.34086	1.00014e-05	0.775576	NA	NA	6.38327
rs79663439	4.99904	0.531565	-0.34086	1.00014e-05	0.775576	NA	NA	6.38327
rs144299950	4.98258	0.532536	-0.312329	1.01173e-05	0.793734	NA	NA	5.89866
rs4437734	-0.371262	0.533434	-0.00683696	8.7755e-06	0.939321	NA	NA	1.80825
rs189390391	4.92657	0.5381	-0.293092	1.05559e-05	0.806556	NA	NA	5.61515
rs191830054	3.4014	0.540767	0.12487	1.55248e-05	0.878387	NA	NA	3.54113
rs145455370	4.85868	0.543273	-0.224158	9.84671e-06	0.85169	NA	NA	4.4101
rs146025181	3.92716	0.544159	0.193876	1.26407e-06	0.855079	NA	NA	4.70453
rs113500977	-2.06976	0.550251	0.214915	1.38235e-06	0.704156	NA	NA	9.40679
rs34362304	-0.522152	0.552378	0.0460267	2.52743e-06	0.748214	NA	NA	8.10074
rs17028895	0.502153	0.55324	0.167611	1.69498e-05	0.174776	NA	NA	25.0254
rs74392178	-1.19782	0.555617	-0.44088	1.90483e-06	0.178644	NA	NA	26.9042
rs151161585	3.76492	0.556442	-0.277392	5.59979e-06	0.778106	NA	NA	6.86221
rs73338617	-0.963036	0.558308	-0.0255382	1.20282e-05	0.91663	NA	NA	2.58333
rs75883103	-3.85316	0.559035	-1.28627	1.3947e-05	0.185643	NA	NA	25.0275
rs79174017	-1.8281	0.560183	-0.676395	2.30066e-06	0.177956	NA	NA	27.0072
rs142930187	-3.84655	0.560434	-1.32169	1.37607e-05	0.174674	NA	NA	25.5732
rs138508820.COSV60194152.COSV60196257	-3.84655	0.560434	-1.32169	1.37607e-05	0.174674	NA	NA	25.5732
rs138809000	-3.84655	0.560434	-1.32169	1.37607e-05	0.174674	NA	NA	25.5732
rs78958026	-3.8403	0.561267	-1.32368	1.39008e-05	0.174267	NA	NA	25.633
rs114192932	2.10943	0.562317	-0.149464	1.24288e-05	0.781554	NA	NA	6.61669
rs75759688	-3.79307	0.565627	-1.34077	1.39908e-05	0.168378	NA	NA	26.1163
rs117859772	-3.70235	0.566412	-0.103677	9.97285e-06	0.914807	NA	NA	2.72401
rs147319068	3.67694	0.570892	-1.65146	9.28213e-07	0.125389	NA	NA	30.9936
rs149111244	-2.60885	0.575284	-0.0754379	3.99498e-06	0.917359	NA	NA	2.81035
rs148433271	3.57408	0.577998	-0.272398	6.01429e-06	0.78207	NA	NA	7.08176
rs117333627	-1.10763	0.579573	-0.437793	1.66006e-06	0.177058	NA	NA	28.3283
rs1486830	1.50434	0.580315	-0.116428	4.98166e-06	0.781936	NA	NA	7.18351
rs147905017	-3.59132	0.586432	-1.35757	1.32128e-05	0.164024	NA	NA	27.4319
rs1351158	-1.08926	0.591012	-0.297096	4.04305e-06	0.139884	3.84902e-07	0.572329	21.43
rs112434816	-0.475649	0.5974	0.0175044	3.87755e-06	0.903466	NA	NA	3.54949
rs1986382	-0.306271	0.6008	-0.0212665	4.51778e-06	0.816261	NA	NA	6.49284
rs2139515	0.478617	0.601698	0.0155378	1.06394e-05	0.909568	NA	NA	3.14432
rs77450464	1.10549	0.60215	-0.410737	1.40445e-05	0.189079	NA	NA	27.0893
rs76321912	-0.680193	0.605284	0.310246	4.79672e-06	0.12823	NA	NA	31.3241
rs13026592	-0.273982	0.606575	0.0206031	1.79313e-05	0.789909	NA	NA	6.99394
rs79250166	1.26749	0.611058	0.100213	4.1085e-09	0.8396	NA	NA	7.32711
rs28564459	-1.77207	0.614087	0.242489	4.72279e-08	0.708361	NA	NA	12.0368
rs150026771	3.97654	0.616102	-2.20484	7.02734e-08	0.127118	NA	NA	35.669
rs7882468	0.523895	0.623077	-0.0474134	1.29057e-06	0.785983	NA	NA	8.2991
rs1544279	0.33621	0.62778	0.0239721	1.77339e-07	0.844708	NA	NA	6.65555
rs114687431	1.49903	0.629703	-0.111805	9.6776e-06	0.810698	NA	NA	6.9408
rs1452787	0.309857	0.630856	-0.0271768	3.13456e-06	0.789438	NA	NA	8.06352
rs2494732.COSV62573275	-0.253691	0.638147	-0.0100908	1.07183e-06	0.909759	NA	NA	3.82543
rs4561537	0.483145	0.644954	-0.0058159	8.4628e-06	0.970869	NA	NA	1.18944
rs78550505	0.573403	0.645522	0.256917	9.52777e-06	0.16963	NA	NA	30.9419
rs17499798	-3.61666	0.647183	0.474324	7.45689e-07	0.719948	NA	NA	11.5944
rs17500264	-3.61666	0.647183	0.474324	7.45689e-07	0.719948	NA	NA	11.5944
rs139827215.COSV55097108	-3.61229	0.647777	0.47633	7.83482e-07	0.718612	NA	NA	11.6502
rs78835307	-0.881975	0.660069	-0.0498038	1.7321e-05	0.865027	NA	NA	5.34503
rs142417959	-3.34885	0.669015	-0.149555	9.58355e-06	0.898684	NA	NA	4.27495
rs111347886	2.76268	0.669114	-1.46445	3.49167e-06	0.1528	NA	NA	34.644
rs59894521	-1.14799	0.672824	-0.677134	1.21601e-07	0.16409	NA	NA	37.1007
rs10967875	-0.277009	0.674601	-0.0125837	1.45801e-05	0.896688	NA	NA	4.34531
rs79992884	-2.74197	0.679365	-1.54262	5.01735e-07	0.171506	NA	NA	36.0039
rs60056594	-1.46724	0.682731	-0.0693613	1.42626e-05	0.895455	NA	NA	4.51395
rs34362304.1	-0.356283	0.685211	-0.0170375	3.54736e-06	0.90313	NA	NA	4.56376
rs799240	1.42587	0.695112	-0.820551	7.80778e-06	0.136828	NA	NA	36.527
rs185478723	-4.25221	0.704382	-2.11534	2.56296e-06	0.1262	7.26989e-06	0.632302	33.2207
JHU_3.56847944	-0.205732	0.705365	-0.0112577	3.62114e-06	0.895047	NA	NA	5.18811
rs799240.1	1.37103	0.706667	-0.824059	8.64007e-06	0.134271	NA	NA	37.541
rs151188154	-4.21482	0.706791	-1.95786	2.91319e-06	0.101167	5.69546e-06	0.506463	31.7181
rs150113374	-4.22046	0.70694	-1.97922	2.35395e-06	0.144702	6.92502e-06	0.62845	31.9245
rs79168666	-4.13614	0.712648	-1.65312	2.39107e-06	0.162577	6.17487e-06	0.556212	28.555
rs145884040	1.4142	0.71399	0.30461	8.32742e-06	0.701863	9.32701e-09	0.514983	17.7221
rs186502932	-4.08021	0.716362	-1.36042	2.08237e-06	0.165463	5.26231e-06	0.46179	25.0048
rs2234322	-4.05916	0.717552	-1.78872	2.4078e-06	0.131376	6.08399e-06	0.527247	30.5875
rs144809614	-4.05789	0.717616	-1.79441	2.41709e-06	0.144087	6.06883e-06	0.563672	30.6616
rs76108114	1.47746	0.719844	-0.957798	4.53778e-06	0.134496	NA	NA	39.3304
rs74606713	2.85335	0.720539	-1.67807	3.71092e-07	0.118489	9.5897e-07	0.640554	37.0319
rs17071497	2.85335	0.720539	-1.67807	3.71092e-07	0.118489	9.5897e-07	0.640554	37.0319
rs242682	-0.901519	0.720779	-0.545424	4.06694e-06	0.166001	NA	NA	37.6949
rs143116789	-4.00304	0.721636	-1.89116	2.34597e-06	0.133119	5.94184e-06	0.567176	32.0851
rs74742299	-0.349706	0.723012	-0.218294	1.25491e-06	0.177805	NA	NA	38.432
rs117005966	-3.96839	0.723032	-2.50218	2.32243e-06	0.0882378	6.09578e-06	0.642609	38.6702
rs77836279	-3.97268	0.723241	-1.85908	2.50242e-06	0.14403	6.19113e-06	0.587517	31.8785
rs77880877	-3.9785	0.723312	-1.91521	2.80258e-06	0.127556	6.2674e-06	0.567261	32.4958
rs149212121	2.81275	0.723736	-1.54402	1.4404e-06	0.119557	7.5278e-07	0.642456	35.4396
rs117187571	-3.96484	0.72399	-1.91936	2.44532e-06	0.137848	6.12873e-06	0.591792	32.6189
rs137938953	-3.96686	0.724144	-1.89202	2.78138e-06	0.125236	6.47988e-06	0.551109	32.2932
rs79799102.COSV50773771	-3.94501	0.725524	-1.90522	2.46753e-06	0.131944	6.00826e-06	0.570862	32.5665
rs117199719	-3.92927	0.726411	-1.91778	2.4367e-06	0.129636	6.03083e-06	0.569143	32.7991
rs117103348	-3.92927	0.726411	-1.91778	2.4367e-06	0.129636	6.03083e-06	0.569143	32.7991
rs183179229	-3.92927	0.726411	-1.91778	2.4367e-06	0.129636	6.03083e-06	0.569143	32.7991
rs80052321	-3.92927	0.726411	-1.91778	2.4367e-06	0.129636	6.03083e-06	0.569143	32.7991
rs1107711	-3.92927	0.726411	-1.91778	2.4367e-06	0.129636	6.03083e-06	0.569143	32.7991
rs143071035	-3.92927	0.726411	-1.91778	2.4367e-06	0.129636	6.03083e-06	0.569143	32.7991
rs143938519	-3.92927	0.726411	-1.91778	2.4367e-06	0.129636	6.03083e-06	0.569143	32.7991
rs141273274.COSV62292497	-3.92927	0.726411	-1.91778	2.4367e-06	0.129636	6.03083e-06	0.569143	32.7991
rs115423851	1.30295	0.726627	-0.141608	4.82699e-06	0.806139	NA	NA	9.80283
rs138680262	-3.92278	0.726999	-1.92513	2.4392e-06	0.128993	6.1238e-06	0.569039	32.9199
rs117742494	-3.9135	0.727605	-1.87937	2.63341e-06	0.131951	6.5126e-06	0.563602	32.4428
rs55927720	0.218674	0.730581	-0.0244138	3.64577e-06	0.806296	NA	NA	10.0432
rs185781921	-3.84605	0.732208	-1.9163	2.45737e-06	0.120297	6.39207e-06	0.539405	33.2555
rs78779956	-3.84916	0.732675	-1.82449	1.85754e-06	0.159576	6.54553e-06	0.597455	32.1572
JHU_15.57537722	1.2865	0.733377	0.145033	3.52815e-07	0.823542	NA	NA	10.1313
rs2056862	-0.178742	0.73501	-0.0117352	1.24768e-06	0.892246	NA	NA	6.16092
rs865866266.COSV63596753	-3.79894	0.735574	-1.95864	2.5029e-06	0.134123	5.99799e-06	0.594698	34.0184
rs150043005	-3.78844	0.73563	-1.70002	2.39431e-06	0.139006	6.11749e-06	0.516918	30.9744
rs184593433	-3.7806	0.73682	-1.95991	2.71269e-06	0.120509	6.09466e-06	0.560242	34.1417
rs149181623	-3.76002	0.737201	-2.1011	2.40722e-06	0.143548	6.30812e-06	0.67293	35.8481
rs117574481	-3.76049	0.7377	-2.07265	2.79679e-06	0.0960372	6.09725e-06	0.522677	35.5323
rs186141507	-3.73583	0.739442	-1.72782	2.27716e-06	0.17464	6.46256e-06	0.608794	31.6239
rs115436176	0.873965	0.74025	0.124271	1.19844e-07	0.792397	NA	NA	12.4491
rs79286480	-3.70698	0.741255	-2.15495	2.69643e-06	0.12757	7.39342e-06	0.653247	36.7618
rs190672052	-3.70698	0.741255	-2.15495	2.69643e-06	0.12757	7.39342e-06	0.653247	36.7618
JHU_X.68616542	-0.525147	0.741406	-0.31019	1.02729e-05	0.195451	NA	NA	37.1336
rs144647750	1.23594	0.741446	-0.859618	5.66067e-06	0.135705	NA	NA	41.0209
rs147493050.COSV50014553	-3.67594	0.742581	-1.72971	2.5014e-06	0.153368	6.57294e-06	0.564341	31.9982
rs76563030	-3.68691	0.742938	-1.75424	2.19009e-06	0.168254	6.30616e-06	0.602462	32.2403
rs144309472	-3.66967	0.744303	-1.7361	2.07788e-06	0.157432	5.31067e-06	0.569139	32.1157
rs79490573	2.09135	0.74442	-1.39849	1.60879e-05	0.136071	NA	NA	40.0732
rs75249371	-3.65422	0.745065	-1.63509	2.41327e-06	0.152201	6.49363e-06	0.525972	30.9131
rs150966442	-3.65034	0.745241	-1.80785	2.3055e-06	0.145932	6.13284e-06	0.570681	33.1217
rs142910242.COSV72155897	-3.64126	0.745975	-1.69022	2.59029e-06	0.15425	6.7841e-06	0.548299	31.7026
rs76887459	-3.62077	0.746459	-1.83143	2.344e-06	0.170798	6.45832e-06	0.64165	33.5906
rs188134673	-3.62494	0.747171	-1.82106	2.13861e-06	0.150813	6.02132e-06	0.584731	33.4385
rs149299681	-3.61507	0.747719	-1.76349	2.35159e-06	0.144224	6.12927e-06	0.551644	32.7875
rs75827462	-3.61067	0.748021	-1.83625	2.29123e-06	0.146668	6.17552e-06	0.582093	33.7117
rs6557316	0.176114	0.749566	-0.0205743	4.77006e-06	0.809769	NA	NA	10.4604
rs6557316.1	0.176114	0.749566	-0.0205743	4.77006e-06	0.809769	NA	NA	10.4604
rs144036672	-3.59586	0.749622	-1.93311	2.28255e-06	0.140126	6.12665e-06	0.597046	34.9633
rs141906400	-3.58567	0.749688	-1.81553	2.34811e-06	0.144179	6.21497e-06	0.569345	33.6134
rs117876812	-3.58567	0.749688	-1.81553	2.34811e-06	0.144179	6.21497e-06	0.569345	33.6134
rs148032509	-3.5818	0.749757	-1.78964	2.34849e-06	0.155914	6.52005e-06	0.586904	33.3177
rs187863221	-3.57391	0.749891	-2.10709	2.5305e-06	0.1076	6.12926e-06	0.571745	37.0901
rs193223899	-3.57458	0.750183	-1.79976	2.44383e-06	0.143037	6.27176e-06	0.561877	33.488
rs186915205	-3.54962	0.751165	-1.77918	2.39224e-06	0.149442	6.34831e-06	0.572428	33.388
rs186310727	-3.55498	0.751222	-1.99275	2.39284e-06	0.137745	6.38682e-06	0.618368	35.9201
rs200839338	-3.55885	0.751591	-1.88051	2.36295e-06	0.135339	6.06571e-06	0.56935	34.5723
rs73954229	-2.05217	0.75223	0.366479	6.50742e-07	0.737645	NA	NA	15.1522
rs191689936	-3.53981	0.752708	-1.92112	2.46756e-06	0.14537	6.54968e-06	0.611311	35.1794
rs147866708	-3.54204	0.752856	-1.86928	2.40413e-06	0.135455	6.21603e-06	0.565241	34.5439
rs144317872	-1.76809	0.753127	-0.947875	2.40993e-06	0.139115	6.36067e-06	0.584598	34.9001
rs11576002	-3.53063	0.753372	-1.82804	2.40901e-06	0.156292	6.43785e-06	0.604513	34.1137
rs75535700	-3.53037	0.753461	-1.91252	2.36864e-06	0.138911	6.29269e-06	0.5901	35.138
rs141044095	-3.52876	0.753539	-1.8324	2.38333e-06	0.182823	6.29685e-06	0.668785	34.1792
rs139420309	-3.52575	0.753829	-1.91303	2.31801e-06	0.145644	6.33824e-06	0.606826	35.1739
rs149091338	-3.52331	0.754416	-2.12924	2.47853e-06	0.0989934	6.21027e-06	0.545027	37.6686
rs80071398	-3.50303	0.75517	-1.86694	2.41085e-06	0.133717	6.40306e-06	0.559916	34.7663
rs140644633	-3.50572	0.755247	-1.91853	2.33393e-06	0.139515	6.2684e-06	0.59304	35.3695
rs77181098	-3.49794	0.755324	-1.72047	2.27837e-06	0.120606	6.44492e-06	0.471987	32.9692
rs185644300	-3.49764	0.755678	-1.9176	2.38175e-06	0.138659	6.32095e-06	0.591414	35.4111
rs76009440	-3.49354	0.755846	-1.92266	2.37747e-06	0.143834	6.32906e-06	0.607339	35.4983
rs141195786	-3.49112	0.756105	-1.92555	2.38652e-06	0.129959	6.27248e-06	0.570381	35.5486
rs145504401	-3.49112	0.756105	-1.92555	2.38652e-06	0.129959	6.27248e-06	0.570381	35.5486
rs181201567	-3.49195	0.756189	-1.92129	2.38114e-06	0.135544	6.14981e-06	0.584391	35.4925
rs78343152	-3.49195	0.756189	-1.92129	2.38114e-06	0.135544	6.14981e-06	0.584391	35.4925
rs79045159	-3.48395	0.756409	-1.90333	2.37608e-06	0.153053	6.30647e-06	0.624466	35.33
rs149234190	-3.48647	0.756546	-1.93429	2.35656e-06	0.139497	6.33269e-06	0.598831	35.683
rs80185227	-3.48481	0.756651	-1.94116	2.38188e-06	0.136884	6.32474e-06	0.594819	35.7754
rs188669982	-1.74105	0.756926	-0.977029	2.43524e-06	0.133935	6.18834e-06	0.591849	35.9456
rs117599468	-3.47863	0.757105	-1.9442	2.38106e-06	0.13626	6.27696e-06	0.594224	35.8521
rs141397086	-3.47755	0.757139	-1.94747	2.38987e-06	0.135852	6.33079e-06	0.594427	35.898
rs149633810	-3.47671	0.757218	-1.93659	2.36571e-06	0.138514	6.32962e-06	0.597162	35.7747
rs150282841	-3.47524	0.757251	-1.91196	2.37236e-06	0.148666	6.2775e-06	0.615289	35.4908
rs190093515	-3.47504	0.757267	-1.96211	2.3338e-06	0.148468	6.27782e-06	0.632264	36.0871
rs148417898	-3.4748	0.757364	-1.92301	2.43182e-06	0.150171	6.49662e-06	0.623021	35.6257
rs117813880	-3.47253	0.757524	-1.94518	2.60667e-06	0.136159	7.15351e-06	0.596504	35.9041
rs137953911	-3.46375	0.757541	-1.94137	2.38078e-06	0.151342	6.30233e-06	0.635176	35.9173
rs117935213	-1.73337	0.757765	-0.972807	2.3557e-06	0.136045	6.25172e-06	0.594561	35.9477
rs181280920	-1.73337	0.757765	-0.972807	2.3557e-06	0.136045	6.25172e-06	0.594561	35.9477
rs140522028	-1.73337	0.757765	-0.972807	2.3557e-06	0.136045	6.25172e-06	0.594561	35.9477
rs181142071.COSV64861078.COSV64862661	-3.46674	0.757765	-1.94561	2.3557e-06	0.136045	6.25172e-06	0.594561	35.9477
rs4292924	-3.46674	0.757765	-1.94561	2.3557e-06	0.136045	6.25172e-06	0.594561	35.9477
rs77317573	-3.46674	0.757765	-1.94561	2.3557e-06	0.136045	6.25172e-06	0.594561	35.9477
rs200567044	-3.46674	0.757765	-1.94561	2.3557e-06	0.136045	6.25172e-06	0.594561	35.9477
rs142598707	-3.46674	0.757765	-1.94561	2.3557e-06	0.136045	6.25172e-06	0.594561	35.9477
rs201041009	-3.46674	0.757765	-1.94561	2.3557e-06	0.136045	6.25172e-06	0.594561	35.9477
rs201172117	-3.46674	0.757765	-1.94561	2.3557e-06	0.136045	6.25172e-06	0.594561	35.9477
rs190431418	-3.46674	0.757765	-1.94561	2.3557e-06	0.136045	6.25172e-06	0.594561	35.9477
rs77827945	-3.46674	0.757765	-1.94561	2.3557e-06	0.136045	6.25172e-06	0.594561	35.9477
rs144503839	-3.46674	0.757765	-1.94561	2.3557e-06	0.136045	6.25172e-06	0.594561	35.9477
rs77599424	-3.46674	0.757765	-1.94561	2.3557e-06	0.136045	6.25172e-06	0.594561	35.9477
rs201729184	-3.46674	0.757765	-1.94561	2.3557e-06	0.136045	6.25172e-06	0.594561	35.9477
rs79007764	-3.46674	0.757765	-1.94561	2.3557e-06	0.136045	6.25172e-06	0.594561	35.9477
rs182566496.COSV63121351	-3.46674	0.757765	-1.94561	2.3557e-06	0.136045	6.25172e-06	0.594561	35.9477
rs74953085.COSV99609448	-3.46674	0.757765	-1.94561	2.3557e-06	0.136045	6.25172e-06	0.594561	35.9477
rs143595907.COSV60739243	-3.46674	0.757765	-1.94561	2.3557e-06	0.136045	6.25172e-06	0.594561	35.9477
rs144676974.COSV52969184	-3.46674	0.757765	-1.94561	2.3557e-06	0.136045	6.25172e-06	0.594561	35.9477
rs118167062	-3.46674	0.757765	-1.94561	2.3557e-06	0.136045	6.25172e-06	0.594561	35.9477
rs148899322	-3.46674	0.757765	-1.94561	2.3557e-06	0.136045	6.25172e-06	0.594561	35.9477
rs75112076	-3.46674	0.757765	-1.94561	2.3557e-06	0.136045	6.25172e-06	0.594561	35.9477
rs117413433	-3.46674	0.757765	-1.94561	2.3557e-06	0.136045	6.25172e-06	0.594561	35.9477
rs182564806	-3.46674	0.757765	-1.94561	2.3557e-06	0.136045	6.25172e-06	0.594561	35.9477
rs79237112	-3.46674	0.757765	-1.94561	2.3557e-06	0.136045	6.25172e-06	0.594561	35.9477
rs117085377	-3.46674	0.757765	-1.94561	2.3557e-06	0.136045	6.25172e-06	0.594561	35.9477
rs74333008	-3.46674	0.757765	-1.94561	2.3557e-06	0.136045	6.25172e-06	0.594561	35.9477
rs118128212	-3.46674	0.757765	-1.94561	2.3557e-06	0.136045	6.25172e-06	0.594561	35.9477
rs140547244	-3.46674	0.757765	-1.94561	2.3557e-06	0.136045	6.25172e-06	0.594561	35.9477
rs141553115	-3.46674	0.757765	-1.94561	2.3557e-06	0.136045	6.25172e-06	0.594561	35.9477
rs373883681	-3.46674	0.757765	-1.94561	2.3557e-06	0.136045	6.25172e-06	0.594561	35.9477
rs183686803	-3.46674	0.757765	-1.94561	2.3557e-06	0.136045	6.25172e-06	0.594561	35.9477
rs75334178	-3.46674	0.757765	-1.94561	2.3557e-06	0.136045	6.25172e-06	0.594561	35.9477
rs146138781	-3.46674	0.757765	-1.94561	2.3557e-06	0.136045	6.25172e-06	0.594561	35.9477
rs182745218	-3.46674	0.757765	-1.94561	2.3557e-06	0.136045	6.25172e-06	0.594561	35.9477
rs183961685	-3.46674	0.757765	-1.94561	2.3557e-06	0.136045	6.25172e-06	0.594561	35.9477
rs117665794	-3.46674	0.757765	-1.94561	2.3557e-06	0.136045	6.25172e-06	0.594561	35.9477
rs12616529	-3.46674	0.757765	-1.94561	2.3557e-06	0.136045	6.25172e-06	0.594561	35.9477
rs145285676	-3.46674	0.757765	-1.94561	2.3557e-06	0.136045	6.25172e-06	0.594561	35.9477
rs76455076.COSV71375001	-3.46674	0.757765	-1.94561	2.3557e-06	0.136045	6.25172e-06	0.594561	35.9477
rs199998986.COSV57492773	-3.46674	0.757765	-1.94561	2.3557e-06	0.136045	6.25172e-06	0.594561	35.9477
rs75460542	-3.46674	0.757765	-1.94561	2.3557e-06	0.136045	6.25172e-06	0.594561	35.9477
rs141981259	-3.46674	0.757765	-1.94561	2.3557e-06	0.136045	6.25172e-06	0.594561	35.9477
rs79396968	-3.46674	0.757765	-1.94561	2.3557e-06	0.136045	6.25172e-06	0.594561	35.9477
rs138029084	-3.46674	0.757765	-1.94561	2.3557e-06	0.136045	6.25172e-06	0.594561	35.9477
rs145942849	-3.46674	0.757765	-1.94561	2.3557e-06	0.136045	6.25172e-06	0.594561	35.9477
rs140048660	-3.46674	0.757765	-1.94561	2.3557e-06	0.136045	6.25172e-06	0.594561	35.9477
rs78769695	-3.46674	0.757765	-1.94561	2.3557e-06	0.136045	6.25172e-06	0.594561	35.9477
rs74323520	-3.46674	0.757765	-1.94561	2.3557e-06	0.136045	6.25172e-06	0.594561	35.9477
rs77410040	-3.46674	0.757765	-1.94561	2.3557e-06	0.136045	6.25172e-06	0.594561	35.9477
rs77776626	-3.46674	0.757765	-1.94561	2.3557e-06	0.136045	6.25172e-06	0.594561	35.9477
rs55944080.COSV51420832	-3.46674	0.757765	-1.94561	2.3557e-06	0.136045	6.25172e-06	0.594561	35.9477
rs147394705	-3.46674	0.757765	-1.94561	2.3557e-06	0.136045	6.25172e-06	0.594561	35.9477
rs151269764	-3.46674	0.757765	-1.94561	2.3557e-06	0.136045	6.25172e-06	0.594561	35.9477
rs201448153.COSV59509600.COSV59509654	-3.46674	0.757765	-1.94561	2.3557e-06	0.136045	6.25172e-06	0.594561	35.9477
rs147928934	-3.46674	0.757765	-1.94561	2.3557e-06	0.136045	6.25172e-06	0.594561	35.9477
rs146637751	-3.46674	0.757765	-1.94561	2.3557e-06	0.136045	6.25172e-06	0.594561	35.9477
rs143727777	-3.46674	0.757765	-1.94561	2.3557e-06	0.136045	6.25172e-06	0.594561	35.9477
rs80090047	-3.46674	0.757765	-1.94561	2.3557e-06	0.136045	6.25172e-06	0.594561	35.9477
rs149935322	-3.46674	0.757765	-1.94561	2.3557e-06	0.136045	6.25172e-06	0.594561	35.9477
rs76323370	-3.46674	0.757765	-1.94561	2.3557e-06	0.136045	6.25172e-06	0.594561	35.9477
rs201455234	-3.46674	0.757765	-1.94561	2.3557e-06	0.136045	6.25172e-06	0.594561	35.9477
rs192130640	-3.46674	0.757765	-1.94561	2.3557e-06	0.136045	6.25172e-06	0.594561	35.9477
rs77068413	-3.46674	0.757765	-1.94561	2.3557e-06	0.136045	6.25172e-06	0.594561	35.9477
rs76983277	-3.46674	0.757765	-1.94561	2.3557e-06	0.136045	6.25172e-06	0.594561	35.9477
rs140374255	-3.46674	0.757765	-1.94561	2.3557e-06	0.136045	6.25172e-06	0.594561	35.9477
rs79012420	-3.46674	0.757765	-1.94561	2.3557e-06	0.136045	6.25172e-06	0.594561	35.9477
rs144738175	-3.46674	0.757765	-1.94561	2.3557e-06	0.136045	6.25172e-06	0.594561	35.9477
rs142272086	-3.46674	0.757765	-1.94561	2.3557e-06	0.136045	6.25172e-06	0.594561	35.9477
rs77247585	-3.46674	0.757765	-1.94561	2.3557e-06	0.136045	6.25172e-06	0.594561	35.9477
rs200773812.COSV55788901	-3.46674	0.757765	-1.94561	2.3557e-06	0.136045	6.25172e-06	0.594561	35.9477
rs144418856	-3.46674	0.757765	-1.94561	2.3557e-06	0.136045	6.25172e-06	0.594561	35.9477
rs143766660	-3.46674	0.757765	-1.94561	2.3557e-06	0.136045	6.25172e-06	0.594561	35.9477
rs149138836	-3.46674	0.757765	-1.94561	2.3557e-06	0.136045	6.25172e-06	0.594561	35.9477
rs150102589	-3.46674	0.757765	-1.94561	2.3557e-06	0.136045	6.25172e-06	0.594561	35.9477
rs77295369	-3.46674	0.757765	-1.94561	2.3557e-06	0.136045	6.25172e-06	0.594561	35.9477
rs139345209	-3.46674	0.757765	-1.94561	2.3557e-06	0.136045	6.25172e-06	0.594561	35.9477
rs140133635	-3.46674	0.757765	-1.94561	2.3557e-06	0.136045	6.25172e-06	0.594561	35.9477
rs74758811	-3.46674	0.757765	-1.94561	2.3557e-06	0.136045	6.25172e-06	0.594561	35.9477
rs188215829	-3.46674	0.757765	-1.94561	2.3557e-06	0.136045	6.25172e-06	0.594561	35.9477
Variant13197	-3.46674	0.757765	-1.94561	2.3557e-06	0.136045	6.25172e-06	0.594561	35.9477
rs141590348	-3.46674	0.757765	-1.94561	2.3557e-06	0.136045	6.25172e-06	0.594561	35.9477
rs150126545	-3.46674	0.757765	-1.94561	2.3557e-06	0.136045	6.25172e-06	0.594561	35.9477
rs145282515	-3.46674	0.757765	-1.94561	2.3557e-06	0.136045	6.25172e-06	0.594561	35.9477
rs190167587	-3.46674	0.757765	-1.94561	2.3557e-06	0.136045	6.25172e-06	0.594561	35.9477
rs143811334	-3.46674	0.757765	-1.94561	2.3557e-06	0.136045	6.25172e-06	0.594561	35.9477
rs118181921	-3.46674	0.757765	-1.94561	2.3557e-06	0.136045	6.25172e-06	0.594561	35.9477
rs145940614	-3.46674	0.757765	-1.94561	2.3557e-06	0.136045	6.25172e-06	0.594561	35.9477
rs146195485	-3.46674	0.757765	-1.94561	2.3557e-06	0.136045	6.25172e-06	0.594561	35.9477
rs117103332	-3.46674	0.757765	-1.94561	2.3557e-06	0.136045	6.25172e-06	0.594561	35.9477
rs188760100	-3.46674	0.757765	-1.94561	2.3557e-06	0.136045	6.25172e-06	0.594561	35.9477
rs140894340	-3.46674	0.757765	-1.94561	2.3557e-06	0.136045	6.25172e-06	0.594561	35.9477
rs117105033	-3.46674	0.757765	-1.94561	2.3557e-06	0.136045	6.25172e-06	0.594561	35.9477
rs78577254	-3.46674	0.757765	-1.94561	2.3557e-06	0.136045	6.25172e-06	0.594561	35.9477
rs181047361	-3.46674	0.757765	-1.94561	2.3557e-06	0.136045	6.25172e-06	0.594561	35.9477
rs756274300	-3.46674	0.757765	-1.94561	2.3557e-06	0.136045	6.25172e-06	0.594561	35.9477
rs138294595	-3.46674	0.757765	-1.94561	2.3557e-06	0.136045	6.25172e-06	0.594561	35.9477
rs80017634	-3.46674	0.757765	-1.94561	2.3557e-06	0.136045	6.25172e-06	0.594561	35.9477
rs117530837	-3.46674	0.757765	-1.94561	2.3557e-06	0.136045	6.25172e-06	0.594561	35.9477
rs148624022	-3.46674	0.757765	-1.94561	2.3557e-06	0.136045	6.25172e-06	0.594561	35.9477
rs144570135	-3.46674	0.757765	-1.94561	2.3557e-06	0.136045	6.25172e-06	0.594561	35.9477
rs76125754	-3.46674	0.757765	-1.94561	2.3557e-06	0.136045	6.25172e-06	0.594561	35.9477
rs185649024	-3.46674	0.757765	-1.94561	2.3557e-06	0.136045	6.25172e-06	0.594561	35.9477
rs150765053	-3.46674	0.757765	-1.94561	2.3557e-06	0.136045	6.25172e-06	0.594561	35.9477
rs189426448	-3.46674	0.757765	-1.94561	2.3557e-06	0.136045	6.25172e-06	0.594561	35.9477
rs147128577	-3.46674	0.757765	-1.94561	2.3557e-06	0.136045	6.25172e-06	0.594561	35.9477
rs180778692	-3.46674	0.757765	-1.94561	2.3557e-06	0.136045	6.25172e-06	0.594561	35.9477
rs74551351	-3.46674	0.757765	-1.94561	2.3557e-06	0.136045	6.25172e-06	0.594561	35.9477
rs149727107	-3.46674	0.757765	-1.94561	2.3557e-06	0.136045	6.25172e-06	0.594561	35.9477
rs118143777	-3.46674	0.757765	-1.94561	2.3557e-06	0.136045	6.25172e-06	0.594561	35.9477
rs75137689	-3.46674	0.757765	-1.94561	2.3557e-06	0.136045	6.25172e-06	0.594561	35.9477
rs149979103	-3.46674	0.757765	-1.94561	2.3557e-06	0.136045	6.25172e-06	0.594561	35.9477
rs117277536	-3.46674	0.757765	-1.94561	2.3557e-06	0.136045	6.25172e-06	0.594561	35.9477
rs117260329	-3.46674	0.757765	-1.94561	2.3557e-06	0.136045	6.25172e-06	0.594561	35.9477
rs142274336	-3.46674	0.757765	-1.94561	2.3557e-06	0.136045	6.25172e-06	0.594561	35.9477
rs143487881	-3.46674	0.757765	-1.94561	2.3557e-06	0.136045	6.25172e-06	0.594561	35.9477
rs140363477.COSV100236629	-3.46674	0.757765	-1.94561	2.3557e-06	0.136045	6.25172e-06	0.594561	35.9477
rs74854406	-3.46674	0.757765	-1.94561	2.3557e-06	0.136045	6.25172e-06	0.594561	35.9477
rs117375884	-3.46674	0.757765	-1.94561	2.3557e-06	0.136045	6.25172e-06	0.594561	35.9477
rs149508674	-3.46674	0.757765	-1.94561	2.3557e-06	0.136045	6.25172e-06	0.594561	35.9477
rs151209421	-3.46674	0.757765	-1.94561	2.3557e-06	0.136045	6.25172e-06	0.594561	35.9477
rs146453380	-3.46674	0.757765	-1.94561	2.3557e-06	0.136045	6.25172e-06	0.594561	35.9477
rs78744268	-3.46674	0.757765	-1.94561	2.3557e-06	0.136045	6.25172e-06	0.594561	35.9477
rs185957068	-3.46674	0.757765	-1.94561	2.3557e-06	0.136045	6.25172e-06	0.594561	35.9477
rs117079685.COSV55929558	-3.46674	0.757765	-1.94561	2.3557e-06	0.136045	6.25172e-06	0.594561	35.9477
rs145142382	-3.46674	0.757765	-1.94561	2.3557e-06	0.136045	6.25172e-06	0.594561	35.9477
rs180815385	-3.46674	0.757765	-1.94561	2.3557e-06	0.136045	6.25172e-06	0.594561	35.9477
rs148896862	-3.46674	0.757765	-1.94561	2.3557e-06	0.136045	6.25172e-06	0.594561	35.9477
rs139842311	-3.46674	0.757765	-1.94561	2.3557e-06	0.136045	6.25172e-06	0.594561	35.9477
rs75765505	-3.46674	0.757765	-1.94561	2.3557e-06	0.136045	6.25172e-06	0.594561	35.9477
rs191798259	-3.46674	0.757765	-1.94561	2.3557e-06	0.136045	6.25172e-06	0.594561	35.9477
rs118153056	-3.46674	0.757765	-1.94561	2.3557e-06	0.136045	6.25172e-06	0.594561	35.9477
rs147615414	-3.46674	0.757765	-1.94561	2.3557e-06	0.136045	6.25172e-06	0.594561	35.9477
rs149651310	-3.46674	0.757765	-1.94561	2.3557e-06	0.136045	6.25172e-06	0.594561	35.9477
rs141307320	-3.46674	0.757765	-1.94561	2.3557e-06	0.136045	6.25172e-06	0.594561	35.9477
rs117799556	-3.46674	0.757765	-1.94561	2.3557e-06	0.136045	6.25172e-06	0.594561	35.9477
rs150315968	-3.46674	0.757765	-1.94561	2.3557e-06	0.136045	6.25172e-06	0.594561	35.9477
rs138441090	-3.46674	0.757765	-1.94561	2.3557e-06	0.136045	6.25172e-06	0.594561	35.9477
rs151109103	-3.46674	0.757765	-1.94561	2.3557e-06	0.136045	6.25172e-06	0.594561	35.9477
rs75370842	-3.46674	0.757765	-1.94561	2.3557e-06	0.136045	6.25172e-06	0.594561	35.9477
rs148227650	-3.46674	0.757765	-1.94561	2.3557e-06	0.136045	6.25172e-06	0.594561	35.9477
rs139712737	-3.46674	0.757765	-1.94561	2.3557e-06	0.136045	6.25172e-06	0.594561	35.9477
rs150642862	-3.46674	0.757765	-1.94561	2.3557e-06	0.136045	6.25172e-06	0.594561	35.9477
rs77779332	-3.46674	0.757765	-1.94561	2.3557e-06	0.136045	6.25172e-06	0.594561	35.9477
rs144469428	-3.46674	0.757765	-1.94561	2.3557e-06	0.136045	6.25172e-06	0.594561	35.9477
rs11140726	-3.46674	0.757765	-1.94561	2.3557e-06	0.136045	6.25172e-06	0.594561	35.9477
rs147137710	-3.46674	0.757765	-1.94561	2.3557e-06	0.136045	6.25172e-06	0.594561	35.9477
rs117425040	-3.46674	0.757765	-1.94561	2.3557e-06	0.136045	6.25172e-06	0.594561	35.9477
rs142477634	-3.46674	0.757765	-1.94561	2.3557e-06	0.136045	6.25172e-06	0.594561	35.9477
rs144783598	-3.46674	0.757765	-1.94561	2.3557e-06	0.136045	6.25172e-06	0.594561	35.9477
rs190411748	-3.46674	0.757765	-1.94561	2.3557e-06	0.136045	6.25172e-06	0.594561	35.9477
rs79248107	-3.46674	0.757765	-1.94561	2.3557e-06	0.136045	6.25172e-06	0.594561	35.9477
rs143950062	-3.46674	0.757765	-1.94561	2.3557e-06	0.136045	6.25172e-06	0.594561	35.9477
rs76987497	-3.46674	0.757765	-1.94561	2.3557e-06	0.136045	6.25172e-06	0.594561	35.9477
rs118011773	-3.46674	0.757765	-1.94561	2.3557e-06	0.136045	6.25172e-06	0.594561	35.9477
rs144160411	-3.46674	0.757765	-1.94561	2.3557e-06	0.136045	6.25172e-06	0.594561	35.9477
rs116922701	-3.46674	0.757765	-1.94561	2.3557e-06	0.136045	6.25172e-06	0.594561	35.9477
rs56220353.CM045738.COSV64986786	-3.46674	0.757765	-1.94561	2.3557e-06	0.136045	6.25172e-06	0.594561	35.9477
rs56220353.CM045738.COSV64986786.1	-3.46674	0.757765	-1.94561	2.3557e-06	0.136045	6.25172e-06	0.594561	35.9477
rs150444603	-3.46674	0.757765	-1.94561	2.3557e-06	0.136045	6.25172e-06	0.594561	35.9477
rs142798585	-3.46674	0.757765	-1.94561	2.3557e-06	0.136045	6.25172e-06	0.594561	35.9477
rs143952224	-3.46674	0.757765	-1.94561	2.3557e-06	0.136045	6.25172e-06	0.594561	35.9477
rs137867894	-3.46674	0.757765	-1.94561	2.3557e-06	0.136045	6.25172e-06	0.594561	35.9477
rs77046859	-3.46674	0.757765	-1.94561	2.3557e-06	0.136045	6.25172e-06	0.594561	35.9477
rs146728148	-3.46674	0.757765	-1.94561	2.3557e-06	0.136045	6.25172e-06	0.594561	35.9477
rs142137211	-3.46674	0.757765	-1.94561	2.3557e-06	0.136045	6.25172e-06	0.594561	35.9477
rs151136181	-3.46674	0.757765	-1.94561	2.3557e-06	0.136045	6.25172e-06	0.594561	35.9477
rs7130798	-3.46674	0.757765	-1.94561	2.3557e-06	0.136045	6.25172e-06	0.594561	35.9477
rs77991263	-3.46674	0.757765	-1.94561	2.3557e-06	0.136045	6.25172e-06	0.594561	35.9477
rs146219330	-3.46674	0.757765	-1.94561	2.3557e-06	0.136045	6.25172e-06	0.594561	35.9477
rs117186901	-3.46674	0.757765	-1.94561	2.3557e-06	0.136045	6.25172e-06	0.594561	35.9477
rs149502247	-3.46674	0.757765	-1.94561	2.3557e-06	0.136045	6.25172e-06	0.594561	35.9477
rs192998156	-3.46674	0.757765	-1.94561	2.3557e-06	0.136045	6.25172e-06	0.594561	35.9477
rs187343931	-3.46674	0.757765	-1.94561	2.3557e-06	0.136045	6.25172e-06	0.594561	35.9477
rs192586242.COSV100265713	-3.46674	0.757765	-1.94561	2.3557e-06	0.136045	6.25172e-06	0.594561	35.9477
rs144093062	-3.46674	0.757765	-1.94561	2.3557e-06	0.136045	6.25172e-06	0.594561	35.9477
rs144723667	-3.46674	0.757765	-1.94561	2.3557e-06	0.136045	6.25172e-06	0.594561	35.9477
rs117997280	-3.46674	0.757765	-1.94561	2.3557e-06	0.136045	6.25172e-06	0.594561	35.9477
rs147509777	-3.46674	0.757765	-1.94561	2.3557e-06	0.136045	6.25172e-06	0.594561	35.9477
rs11568551	-3.46674	0.757765	-1.94561	2.3557e-06	0.136045	6.25172e-06	0.594561	35.9477
rs148233198	-3.46674	0.757765	-1.94561	2.3557e-06	0.136045	6.25172e-06	0.594561	35.9477
rs74979900	-3.46674	0.757765	-1.94561	2.3557e-06	0.136045	6.25172e-06	0.594561	35.9477
rs142816804	-3.46674	0.757765	-1.94561	2.3557e-06	0.136045	6.25172e-06	0.594561	35.9477
rs149349524	-3.46674	0.757765	-1.94561	2.3557e-06	0.136045	6.25172e-06	0.594561	35.9477
rs17483502	-3.46674	0.757765	-1.94561	2.3557e-06	0.136045	6.25172e-06	0.594561	35.9477
rs187666598	-3.46674	0.757765	-1.94561	2.3557e-06	0.136045	6.25172e-06	0.594561	35.9477
rs151314243	-3.46674	0.757765	-1.94561	2.3557e-06	0.136045	6.25172e-06	0.594561	35.9477
rs180744618	-3.46674	0.757765	-1.94561	2.3557e-06	0.136045	6.25172e-06	0.594561	35.9477
rs78928914	-3.46674	0.757765	-1.94561	2.3557e-06	0.136045	6.25172e-06	0.594561	35.9477
rs145719745	-3.46674	0.757765	-1.94561	2.3557e-06	0.136045	6.25172e-06	0.594561	35.9477
rs138522332	-3.46674	0.757765	-1.94561	2.3557e-06	0.136045	6.25172e-06	0.594561	35.9477
rs140372565.COSV57965275	-3.46674	0.757765	-1.94561	2.3557e-06	0.136045	6.25172e-06	0.594561	35.9477
rs75308431.COSV59240455	-3.46674	0.757765	-1.94561	2.3557e-06	0.136045	6.25172e-06	0.594561	35.9477
rs75308431.COSV59240455.1	-3.46674	0.757765	-1.94561	2.3557e-06	0.136045	6.25172e-06	0.594561	35.9477
rs113125615.CM1618189.COSV57510955	-3.46674	0.757765	-1.94561	2.3557e-06	0.136045	6.25172e-06	0.594561	35.9477
rs151149985	-3.46674	0.757765	-1.94561	2.3557e-06	0.136045	6.25172e-06	0.594561	35.9477
rs187801483	-3.46674	0.757765	-1.94561	2.3557e-06	0.136045	6.25172e-06	0.594561	35.9477
rs139236309	-3.46674	0.757765	-1.94561	2.3557e-06	0.136045	6.25172e-06	0.594561	35.9477
rs150455908	-3.46674	0.757765	-1.94561	2.3557e-06	0.136045	6.25172e-06	0.594561	35.9477
rs78821196	-3.46674	0.757765	-1.94561	2.3557e-06	0.136045	6.25172e-06	0.594561	35.9477
rs138251806	-3.46674	0.757765	-1.94561	2.3557e-06	0.136045	6.25172e-06	0.594561	35.9477
rs75783783	-3.46674	0.757765	-1.94561	2.3557e-06	0.136045	6.25172e-06	0.594561	35.9477
rs147223470	-3.46674	0.757765	-1.94561	2.3557e-06	0.136045	6.25172e-06	0.594561	35.9477
rs1345092	-3.46674	0.757765	-1.94561	2.3557e-06	0.136045	6.25172e-06	0.594561	35.9477
rs150217370	-3.46674	0.757765	-1.94561	2.3557e-06	0.136045	6.25172e-06	0.594561	35.9477
rs74820648	-3.46674	0.757765	-1.94561	2.3557e-06	0.136045	6.25172e-06	0.594561	35.9477
rs145985541	-3.46674	0.757765	-1.94561	2.3557e-06	0.136045	6.25172e-06	0.594561	35.9477
rs149915751	-3.46674	0.757765	-1.94561	2.3557e-06	0.136045	6.25172e-06	0.594561	35.9477
rs183328539	-3.46674	0.757765	-1.94561	2.3557e-06	0.136045	6.25172e-06	0.594561	35.9477
rs117938586	-3.46674	0.757765	-1.94561	2.3557e-06	0.136045	6.25172e-06	0.594561	35.9477
rs9568147	-3.46674	0.757765	-1.94561	2.3557e-06	0.136045	6.25172e-06	0.594561	35.9477
rs149949253	-3.46674	0.757765	-1.94561	2.3557e-06	0.136045	6.25172e-06	0.594561	35.9477
rs140358575	-3.46674	0.757765	-1.94561	2.3557e-06	0.136045	6.25172e-06	0.594561	35.9477
rs144842247	-3.46674	0.757765	-1.94561	2.3557e-06	0.136045	6.25172e-06	0.594561	35.9477
rs117068479	-3.46674	0.757765	-1.94561	2.3557e-06	0.136045	6.25172e-06	0.594561	35.9477
rs191179599	-3.46674	0.757765	-1.94561	2.3557e-06	0.136045	6.25172e-06	0.594561	35.9477
rs201686630	-3.46674	0.757765	-1.94561	2.3557e-06	0.136045	6.25172e-06	0.594561	35.9477
rs76936836	-3.46674	0.757765	-1.94561	2.3557e-06	0.136045	6.25172e-06	0.594561	35.9477
rs117114387	-3.46674	0.757765	-1.94561	2.3557e-06	0.136045	6.25172e-06	0.594561	35.9477
rs138008369	-3.46674	0.757765	-1.94561	2.3557e-06	0.136045	6.25172e-06	0.594561	35.9477
rs74576923	-3.46674	0.757765	-1.94561	2.3557e-06	0.136045	6.25172e-06	0.594561	35.9477
rs79367070	-3.46674	0.757765	-1.94561	2.3557e-06	0.136045	6.25172e-06	0.594561	35.9477
rs80274596	-3.46674	0.757765	-1.94561	2.3557e-06	0.136045	6.25172e-06	0.594561	35.9477
rs184674278	-3.46674	0.757765	-1.94561	2.3557e-06	0.136045	6.25172e-06	0.594561	35.9477
rs142952191	-3.46674	0.757765	-1.94561	2.3557e-06	0.136045	6.25172e-06	0.594561	35.9477
rs75812946	-3.46674	0.757765	-1.94561	2.3557e-06	0.136045	6.25172e-06	0.594561	35.9477
rs117850114	-3.46674	0.757765	-1.94561	2.3557e-06	0.136045	6.25172e-06	0.594561	35.9477
rs79641633	-3.46674	0.757765	-1.94561	2.3557e-06	0.136045	6.25172e-06	0.594561	35.9477
rs180939683	-3.46674	0.757765	-1.94561	2.3557e-06	0.136045	6.25172e-06	0.594561	35.9477
rs79275026	-3.46674	0.757765	-1.94561	2.3557e-06	0.136045	6.25172e-06	0.594561	35.9477
rs145526987	-3.46674	0.757765	-1.94561	2.3557e-06	0.136045	6.25172e-06	0.594561	35.9477
rs116753155.COSV55012489	-3.46674	0.757765	-1.94561	2.3557e-06	0.136045	6.25172e-06	0.594561	35.9477
rs151314215	-3.46674	0.757765	-1.94561	2.3557e-06	0.136045	6.25172e-06	0.594561	35.9477
rs139573892	-3.46674	0.757765	-1.94561	2.3557e-06	0.136045	6.25172e-06	0.594561	35.9477
rs200236506.COSV101237223	-3.46674	0.757765	-1.94561	2.3557e-06	0.136045	6.25172e-06	0.594561	35.9477
rs182444420	-3.46674	0.757765	-1.94561	2.3557e-06	0.136045	6.25172e-06	0.594561	35.9477
rs145654017	-3.46674	0.757765	-1.94561	2.3557e-06	0.136045	6.25172e-06	0.594561	35.9477
rs186631004	-3.46674	0.757765	-1.94561	2.3557e-06	0.136045	6.25172e-06	0.594561	35.9477
rs76067459	-3.46674	0.757765	-1.94561	2.3557e-06	0.136045	6.25172e-06	0.594561	35.9477
rs184997830	-3.46674	0.757765	-1.94561	2.3557e-06	0.136045	6.25172e-06	0.594561	35.9477
rs149140245	-3.46674	0.757765	-1.94561	2.3557e-06	0.136045	6.25172e-06	0.594561	35.9477
rs138607085	-3.46674	0.757765	-1.94561	2.3557e-06	0.136045	6.25172e-06	0.594561	35.9477
rs143784778	-3.46674	0.757765	-1.94561	2.3557e-06	0.136045	6.25172e-06	0.594561	35.9477
rs189310554	-3.46674	0.757765	-1.94561	2.3557e-06	0.136045	6.25172e-06	0.594561	35.9477
rs77374713	-3.46674	0.757765	-1.94561	2.3557e-06	0.136045	6.25172e-06	0.594561	35.9477
rs117221568	-3.46674	0.757765	-1.94561	2.3557e-06	0.136045	6.25172e-06	0.594561	35.9477
rs2303978	-3.46674	0.757765	-1.94561	2.3557e-06	0.136045	6.25172e-06	0.594561	35.9477
rs148636563	-3.46674	0.757765	-1.94561	2.3557e-06	0.136045	6.25172e-06	0.594561	35.9477
rs147903466	-3.46674	0.757765	-1.94561	2.3557e-06	0.136045	6.25172e-06	0.594561	35.9477
rs79914366	-3.46674	0.757765	-1.94561	2.3557e-06	0.136045	6.25172e-06	0.594561	35.9477
rs142909525	-3.46674	0.757765	-1.94561	2.3557e-06	0.136045	6.25172e-06	0.594561	35.9477
rs150972124	-3.46674	0.757765	-1.94561	2.3557e-06	0.136045	6.25172e-06	0.594561	35.9477
rs138013990	-3.46674	0.757765	-1.94561	2.3557e-06	0.136045	6.25172e-06	0.594561	35.9477
rs2288901	-3.46674	0.757765	-1.94561	2.3557e-06	0.136045	6.25172e-06	0.594561	35.9477
rs150155929	-3.46674	0.757765	-1.94561	2.3557e-06	0.136045	6.25172e-06	0.594561	35.9477
rs80119825	-3.46674	0.757765	-1.94561	2.3557e-06	0.136045	6.25172e-06	0.594561	35.9477
rs140190524	-3.46674	0.757765	-1.94561	2.3557e-06	0.136045	6.25172e-06	0.594561	35.9477
rs184959520	-3.46674	0.757765	-1.94561	2.3557e-06	0.136045	6.25172e-06	0.594561	35.9477
rs139585754	-3.46674	0.757765	-1.94561	2.3557e-06	0.136045	6.25172e-06	0.594561	35.9477
rs75974495	-3.46674	0.757765	-1.94561	2.3557e-06	0.136045	6.25172e-06	0.594561	35.9477
rs188877536	-3.46674	0.757765	-1.94561	2.3557e-06	0.136045	6.25172e-06	0.594561	35.9477
rs78093016	-3.46674	0.757765	-1.94561	2.3557e-06	0.136045	6.25172e-06	0.594561	35.9477
rs147762749	-3.46674	0.757765	-1.94561	2.3557e-06	0.136045	6.25172e-06	0.594561	35.9477
rs139987367	-3.46674	0.757765	-1.94561	2.3557e-06	0.136045	6.25172e-06	0.594561	35.9477
rs79741302	-3.46674	0.757765	-1.94561	2.3557e-06	0.136045	6.25172e-06	0.594561	35.9477
rs188561108	-3.46674	0.757765	-1.94561	2.3557e-06	0.136045	6.25172e-06	0.594561	35.9477
rs148921170	-3.46674	0.757765	-1.94561	2.3557e-06	0.136045	6.25172e-06	0.594561	35.9477
rs58563114	-3.46674	0.757765	-1.94561	2.3557e-06	0.136045	6.25172e-06	0.594561	35.9477
rs17285869	-3.46674	0.757765	-1.94561	2.3557e-06	0.136045	6.25172e-06	0.594561	35.9477
rs188342261	-3.46674	0.757765	-1.94561	2.3557e-06	0.136045	6.25172e-06	0.594561	35.9477
rs142208865	-3.46674	0.757765	-1.94561	2.3557e-06	0.136045	6.25172e-06	0.594561	35.9477
rs182040920	-3.46674	0.757765	-1.94561	2.3557e-06	0.136045	6.25172e-06	0.594561	35.9477
rs117503332.COSV60212053	-3.46698	0.757885	-1.9445	2.37145e-06	0.13677	6.30897e-06	0.595237	35.9329
rs117026171	-3.46444	0.757945	-1.93879	2.3847e-06	0.132998	6.32824e-06	0.583451	35.8821
rs138017670	-3.46585	0.757964	-1.94635	2.36946e-06	0.13734	6.03231e-06	0.597369	35.9623
rs184867391	-3.46406	0.758079	-1.94772	2.37733e-06	0.135292	6.32653e-06	0.592557	35.9904
rs117008532	-3.46398	0.758097	-1.94916	2.31207e-06	0.136262	6.28209e-06	0.594734	36.008
rs144818111	-3.46178	0.75811	-1.97082	2.41177e-06	0.124773	6.38291e-06	0.571353	36.2776
rs145058362	-3.46131	0.758223	-1.93249	2.39584e-06	0.139283	6.32754e-06	0.598487	35.828
rs145926571	-3.46131	0.758223	-1.93249	2.39584e-06	0.139283	6.32754e-06	0.598487	35.828
rs74815459	-3.46131	0.758223	-1.93249	2.39584e-06	0.139283	6.32754e-06	0.598487	35.828
rs555684936	-3.46131	0.758223	-1.93249	2.39584e-06	0.139283	6.32754e-06	0.598487	35.828
rs144521331	-3.46131	0.758223	-1.93249	2.39584e-06	0.139283	6.32754e-06	0.598487	35.828
rs148274683	-3.46131	0.758223	-1.93249	2.39584e-06	0.139283	6.32754e-06	0.598487	35.828
rs117929532	-1.73075	0.758263	-0.976235	2.39245e-06	0.136276	6.17237e-06	0.598149	36.0636
rs76502135	-3.46026	0.758342	-1.95297	2.35816e-06	0.135369	6.34789e-06	0.59444	36.0777
rs191455113	-3.46026	0.758342	-1.95297	2.35816e-06	0.135369	6.34789e-06	0.59444	36.0777
rs138583848	-3.45826	0.758471	-1.95382	2.34601e-06	0.134175	6.32565e-06	0.590902	36.1011
rs147172117	-3.45619	0.758689	-1.98824	2.4199e-06	0.133967	6.42071e-06	0.604038	36.5188
rs74469315	-3.45437	0.758742	-1.95405	2.36264e-06	0.136021	6.21492e-06	0.597089	36.1297
rs77074472	-3.45317	0.758776	-1.95992	2.37159e-06	0.131857	6.32637e-06	0.587399	36.2071
rs186100104	-3.4327	0.758817	-1.93932	2.34086e-06	0.218723	6.43056e-06	0.79084	36.1004
rs147531075	-3.45452	0.758862	-1.97191	2.35077e-06	0.136777	5.96686e-06	0.605872	36.339
rs75164447	-3.44908	0.759082	-1.9604	2.35632e-06	0.133667	6.32642e-06	0.59234	36.2401
rs148242667	-3.45237	0.759091	-1.88742	1.71736e-06	0.146308	5.32558e-06	0.588837	35.3464
rs192527985	-3.44843	0.759104	-1.95491	2.39776e-06	0.126326	6.41761e-06	0.569549	36.1796
rs373885001	1.52496	0.759191	-1.10981	9.75047e-06	0.136736	NA	NA	42.1216
rs148857836	-3.44567	0.759229	-2.03461	2.45337e-06	0.127946	6.49541e-06	0.605393	37.126
rs117426093	-3.44542	0.759282	-1.96365	2.3875e-06	0.137888	6.28947e-06	0.606115	36.3029
rs145636984	-3.44584	0.759282	-1.96439	2.38719e-06	0.137751	6.26284e-06	0.605977	36.3088
rs117483918	-3.44329	0.759424	-1.95421	2.3492e-06	0.129396	6.3388e-06	0.577769	36.2058
rs78594119	-3.44491	0.75952	-1.95732	2.42815e-06	0.133111	6.33663e-06	0.589619	36.2317
rs143273711	-3.43993	0.759698	-1.97625	2.35788e-06	0.133023	6.31376e-06	0.596614	36.4879
rs150530277	-3.43993	0.759698	-1.97625	2.35788e-06	0.133023	6.31376e-06	0.596614	36.4879
rs143151647	-3.43655	0.75974	-2.0096	2.38497e-06	0.125036	6.34223e-06	0.58669	36.8995
rs145682657	-3.43812	0.759804	-1.99266	2.39327e-06	0.133142	6.3465e-06	0.603776	36.6919
rs116968396	-3.43812	0.759804	-1.99266	2.39327e-06	0.133142	6.3465e-06	0.603776	36.6919
rs140812674	-3.43582	0.759926	-1.84804	1.89746e-06	0.152396	5.72847e-06	0.591889	34.9752
rs184723631	-3.43793	0.759999	-1.98173	2.45603e-06	0.144242	6.63035e-06	0.628763	36.5656
rs117121599	-3.43198	0.760078	-1.94571	2.37387e-06	0.130552	6.35037e-06	0.578992	36.1811
rs142431868	-3.42937	0.760266	-1.94951	2.36316e-06	0.128365	6.35254e-06	0.573839	36.2438
rs59735373	-3.43263	0.76029	-1.94525	2.44867e-06	0.138484	6.44457e-06	0.600936	36.1713
rs141985240	-3.42194	0.760553	-1.99594	2.35418e-06	0.116	6.30962e-06	0.554565	36.8398
rs117776875	-3.41702	0.76067	-2.19086	2.24865e-06	0.151539	6.26303e-06	0.723053	39.0675
rs144903521	-3.42386	0.760694	-1.98624	2.3877e-06	0.141054	6.21658e-06	0.62342	36.7135
rs75438846	-3.42386	0.760694	-1.98624	2.3877e-06	0.141054	6.21658e-06	0.62342	36.7135
rs576801873	-3.42386	0.760694	-1.98624	2.3877e-06	0.141054	6.21658e-06	0.62342	36.7135
rs11036480	-3.42431	0.760721	-1.98791	2.26116e-06	0.123531	6.30205e-06	0.570613	36.7301
rs11568551.1	-3.42282	0.760998	-1.95997	2.2854e-06	0.139518	5.85785e-06	0.608722	36.4119
rs184326825	-3.41756	0.761036	-2.02523	2.42658e-06	0.118567	6.45787e-06	0.572694	37.2094
rs147001784	-3.42009	0.761374	-1.99747	2.12016e-06	0.124569	5.90542e-06	0.574451	36.8703
rs79925682	-3.41102	0.761667	-2.00108	2.2876e-06	0.131888	6.17305e-06	0.601909	36.9742
rs117771000	-3.40581	0.761944	-1.98561	2.37401e-06	0.133607	6.39716e-06	0.601341	36.8291
rs9552960	-3.39748	0.761955	-2.0165	2.35537e-06	0.106698	6.46562e-06	0.532284	37.2462
rs80169186	-3.40047	0.762276	-2.01031	2.3814e-06	0.137357	6.19582e-06	0.622335	37.1538
rs192779211	-3.40054	0.762427	-1.93134	2.56331e-06	0.13869	6.06729e-06	0.599927	36.2225
rs76377725	-3.40706	0.762447	-1.91209	2.36644e-06	0.13913	4.98267e-06	0.591099	35.9473
rs117638546	-3.3906	0.762829	-1.99098	2.09205e-06	0.139495	6.29882e-06	0.614356	36.9962
rs80232192	-3.38264	0.763123	-2.03409	2.37928e-06	0.129841	6.30785e-06	0.610638	37.5521
rs148681403	-3.38904	0.763177	-2.01934	2.29482e-06	0.123226	6.04741e-06	0.582868	37.3372
rs77536728	-1.68998	0.763268	-0.980862	1.69126e-06	0.228193	3.89671e-06	0.809261	36.7248
rs144911751	-3.37714	0.763976	-1.97542	2.38417e-06	0.136433	6.29962e-06	0.605795	36.906
rs41299438	-3.37714	0.763976	-1.97542	2.38417e-06	0.136433	6.29962e-06	0.605795	36.906
rs146414283	-3.37687	0.764032	-2.03611	2.23655e-06	0.134554	5.18334e-06	0.625625	37.6153
rs146980592	-3.3676	0.764524	-2.07738	2.41956e-06	0.131975	6.32596e-06	0.632362	38.1522
rs56071233.COSV59894748.COSV60371613	-3.3681	0.764827	-1.9542	2.2273e-06	0.139608	4.33029e-06	0.609853	36.7172
rs117576669	-3.35776	0.765006	-2.04869	2.29195e-06	0.113347	6.32999e-06	0.563513	37.8934
rs190410641	-3.36087	0.765229	-2.03813	2.26559e-06	0.134658	5.24441e-06	0.626285	37.7501
rs143972585	-3.34547	0.765919	-2.02927	2.31442e-06	0.1325	6.34831e-06	0.613498	37.7557
rs61422983	-3.33676	0.76636	-1.96156	2.31639e-06	0.120098	6.42477e-06	0.5535	37.0224
rs117559981	-3.34073	0.766468	-1.97889	2.19621e-06	0.132869	6.17916e-06	0.593919	37.1999
rs74727805	-3.33464	0.766655	-2.0373	2.33835e-06	0.13061	6.18876e-06	0.612773	37.9248
rs76720238	-1.66656	0.766757	-1.05772	2.29006e-06	0.113577	6.3462e-06	0.588616	38.8258
rs74446112	-3.33146	0.767106	-2.00085	2.39361e-06	0.141194	5.95546e-06	0.62921	37.5231
rs7433096	0.236025	0.76713	-0.0280117	8.71398e-06	0.815625	NA	NA	10.609
rs147832263	-3.31858	0.767691	-2.05152	2.46644e-06	0.146517	6.41729e-06	0.662248	38.2026
rs12616529.1	-3.30449	0.768766	-2.09345	2.35419e-06	0.105388	6.41852e-06	0.553537	38.7824
rs145539545	-3.29212	0.769723	-1.84986	2.62908e-06	0.141289	6.33895e-06	0.576876	35.9756
rs148734707	-3.28942	0.77031	-1.95286	2.89957e-06	0.140299	4.90158e-06	0.619181	37.2522
rs142524381	-3.27001	0.771214	-2.07109	2.33854e-06	0.144549	4.82207e-06	0.667456	38.7764
rs75717538	-3.27001	0.771214	-2.07109	2.33854e-06	0.144549	4.82207e-06	0.667456	38.7764
rs138881320	-3.25683	0.772277	-1.89314	2.69162e-06	0.143404	6.6688e-06	0.598238	36.7602
rs55691845	-3.2516	0.77242	-1.86589	3.0467e-06	0.167696	6.59253e-06	0.655743	36.4611
rs75067820	-3.26174	0.772453	-2.09296	2.31282e-06	0.105243	6.46835e-06	0.546649	39.0864
rs77325671	-3.23257	0.773774	-2.02485	2.48459e-06	0.136277	6.60554e-06	0.623503	38.5141
rs148634388	-3.22106	0.774522	-2.13311	1.94017e-06	0.117386	5.88666e-06	0.600503	39.8401
rs146874325	-3.21924	0.774879	-2.01532	1.9606e-06	0.122066	5.88476e-06	0.570362	38.5003
rs138766114	-1.07579	0.775189	-0.767661	1.80575e-05	0.160987	NA	NA	41.6426
rs148141096	-1.07579	0.775189	-0.767661	1.80575e-05	0.160987	NA	NA	41.6426
rs139634219	-3.15267	0.779225	-1.89963	2.65513e-06	0.148839	5.82873e-06	0.617222	37.5993
rs115876643	-0.968914	0.78135	0.191105	8.20791e-07	0.742755	NA	NA	16.4743
rs73971620	-3.109	0.782123	-2.01753	2.34768e-06	0.141135	5.03753e-06	0.637358	39.3547
rs13183250	-0.22736	0.783617	-0.0188373	7.10513e-06	0.881091	NA	NA	7.6513
rs117190498	-3.08212	0.783964	-1.93726	2.79165e-06	0.157881	5.73385e-06	0.657104	38.5957
rs116054196	-3.10603	0.78399	-2.08181	3.30192e-06	0.141296	8.34236e-06	0.646936	40.1286
rs74118705	0.329653	0.785489	0.267192	3.00331e-06	0.16345	NA	NA	44.7674
rs55730213	0.226326	0.786274	-0.184925	1.04437e-05	0.138148	NA	NA	44.9665
rs78023683	2.12889	0.787199	-1.75985	8.97877e-06	0.138182	NA	NA	45.255
rs184384228	-3.00414	0.79038	-2.21418	2.1452e-06	0.116703	4.27765e-06	0.6246	42.4308
rs115759450	0.925066	0.792227	0.148164	9.09225e-08	0.815255	NA	NA	13.8054
JHU_X.443544	1.26202	0.804083	0.215486	1.23052e-07	0.812677	NA	NA	14.5844
rs188238736	1.96428	0.804316	0.313109	1.35614e-06	0.80912	NA	NA	13.7486
rs79047578	1.96428	0.804316	0.313109	1.35614e-06	0.80912	NA	NA	13.7486
rs824883	0.205361	0.806998	-0.0299945	4.30415e-06	0.818661	NA	NA	12.7443
rs9560371	-0.685678	0.812492	-0.635171	3.82067e-06	0.160428	NA	NA	48.0881
rs73953618	1.31078	0.815848	-1.13967	1.91925e-08	0.285949	NA	NA	46.5085
rs1996707	-1.28805	0.821869	-1.24946	4.55624e-06	0.159703	NA	NA	49.2397
rs10843210	0.121547	0.822711	-0.0176584	1.81739e-05	0.822682	NA	NA	12.6851
rs74742299.1	-0.218768	0.82426	-0.21321	3.31968e-06	0.169941	NA	NA	49.3567
rs9463642	0.805697	0.824993	-0.138244	6.11081e-06	0.804471	NA	NA	14.6455
rs114313699	0.617765	0.82746	0.0751398	1.53346e-05	0.856577	NA	NA	10.8442
rs79066822	0.738545	0.827617	-0.756104	8.1985e-06	0.140284	NA	NA	50.5874
rs114674819	-1.71146	0.827873	0.414807	9.67849e-07	0.750492	NA	NA	19.5087
rs77051500	-0.520118	0.832208	-0.0611401	3.09788e-06	0.874679	NA	NA	10.5186
rs28583993	-0.406511	0.834218	-0.448743	1.18061e-06	0.160188	NA	NA	52.469
rs9596751	-0.187961	0.837336	-0.0218818	1.17497e-05	0.872112	NA	NA	10.4277
rs2303430.COSV99958199	0.125779	0.840016	0.0167825	1.02607e-05	0.857222	NA	NA	11.7721
exm2271703	0.101703	0.842774	-0.0166556	1.40026e-05	0.825335	NA	NA	14.0721
rs111267874	-0.190856	0.843907	-0.164604	3.82807e-06	0.293581	NA	NA	46.3073
rs73723635	0.611392	0.850149	0.145328	7.16916e-08	0.805099	NA	NA	19.205
rs76232597	-0.596373	0.850437	-0.736086	1.03774e-06	0.159289	NA	NA	55.2427
rs12307709	0.0926249	0.856921	-0.017036	7.59483e-06	0.826883	NA	NA	15.5351
rs114583383	-0.997995	0.859768	0.317977	1.02873e-07	0.754268	NA	NA	24.1629
rs115895926	-0.997995	0.859768	0.317977	1.02873e-07	0.754268	NA	NA	24.1629
JHU_1.210428777	0.106505	0.860374	0.0156105	3.17071e-06	0.87018	NA	NA	12.7834
rs138291276	-0.600981	0.868995	-0.101907	3.45763e-07	0.871085	NA	NA	14.4983
rs114823866	-0.44079	0.869235	-0.0634893	1.35391e-06	0.884822	NA	NA	12.5901
rs1869827	-0.377489	0.870423	0.177658	4.79955e-07	0.652823	NA	NA	32.0021
rs114051767	-0.694942	0.872621	0.220035	1.14723e-06	0.757779	NA	NA	24.0482
rs74839819	-0.432547	0.874757	-0.567322	9.96239e-06	0.173412	NA	NA	56.7396
rs114698522	-0.418783	0.875693	-0.0724174	1.34846e-06	0.868618	NA	NA	14.7429
rs116335195	0.627543	0.883919	-0.948011	8.79481e-06	0.143213	NA	NA	60.17
rs73630199	0.659371	0.884776	-1.08605	4.73916e-06	0.124382	NA	NA	62.2229
rs79243018	0.650812	0.889537	-1.01252	1.3243e-05	0.14344	NA	NA	60.8729
rs149786280	1.07577	0.893169	-1.75	1.0477e-05	0.143665	NA	NA	61.93
rs117059968	1.07577	0.893169	-1.75	1.0477e-05	0.143665	NA	NA	61.93
rs139270070	-0.347251	0.895845	-0.550598	1.71664e-05	0.154443	NA	NA	61.3242
rs117129608	-0.652099	0.896061	-0.128277	1.02001e-05	0.86352	NA	NA	16.4379
rs148134772	1.03984	0.896767	-1.73066	1.02697e-05	0.148963	NA	NA	62.4674
rs61956274	0.87021	0.911794	-0.0375775	9.25089e-06	0.974976	NA	NA	4.13946
rs61735358.COSV99877644	-0.354571	0.912217	-0.0830926	1.35443e-05	0.860898	NA	NA	18.9855
rs10984980.COSV52962906	-0.117753	0.913443	-0.235716	6.61594e-06	0.154167	NA	NA	66.6866
rs73029631	-0.268674	0.918242	0.598164	3.64262e-06	0.145218	NA	NA	69.0052
rs7710712	-0.415615	0.918293	0.199841	1.07808e-06	0.765006	NA	NA	32.4703
rs544207972	0.339796	0.920314	-0.339412	2.62914e-06	0.0654384	1.13862e-07	0.254437	49.9718
rs568099192	0.339499	0.920337	-0.339364	2.59749e-06	0.0654342	1.11922e-07	0.254563	49.9901
rs117189518	0.763847	0.922707	-1.87001	8.7007e-06	0.115752	NA	NA	70.9989
rs75627650	0.158889	0.924823	0.0445413	1.0723e-05	0.859224	NA	NA	21.8951
rs78383629	-0.468696	0.925877	-1.06186	4.59049e-06	0.175622	NA	NA	69.3774
rs80307148	0.373362	0.92948	-0.136297	3.28961e-06	0.837477	NA	NA	26.7427
rs116170736	0.138906	0.931684	-0.0530309	2.07902e-06	0.838828	NA	NA	27.6293
rs143857932	0.633334	0.936007	-1.73475	8.63802e-06	0.145654	NA	NA	73.2554
rs6536093	-0.0456923	0.937177	0.122518	1.82947e-05	0.145789	NA	NA	72.8362
rs865885084	-0.20926	0.939645	0.081845	1.60562e-05	0.839457	NA	NA	28.1153
rs184215464	-0.105071	0.940524	0.110823	1.17844e-06	0.632243	NA	NA	51.332
rs184301693	0.323046	0.940932	0.194213	1.05699e-06	0.787357	NA	NA	37.5465
rs3760440	-0.0338863	0.953737	0.0179207	6.04628e-06	0.841322	NA	NA	34.5913
rs117020986	0.16456	0.95595	-0.0868247	1.64084e-05	0.841802	NA	NA	34.5386
rs187428364	0.196285	0.95702	-0.817728	4.83782e-06	0.147241	NA	NA	80.6428
rs148764537.COSV61115419	-0.224195	0.958662	0.222791	2.31913e-07	0.768436	NA	NA	49.843
rs7160733	0.0263402	0.961996	-0.0159428	1.80393e-05	0.842679	NA	NA	37.705
rs6777050	0.0272866	0.966233	-0.0206785	1.66948e-06	0.843123	NA	NA	43.1116
rs11998041	0.0635238	0.967882	-0.347984	7.36306e-06	0.147286	NA	NA	84.5632
rs56916745	-0.181013	0.96894	0.222963	8.86182e-07	0.773041	NA	NA	55.1922
rs9727148	-0.112301	0.971672	0.261767	2.09847e-06	0.606848	NA	NA	69.9784
rs76385638	0.118469	0.97412	-0.929071	2.67944e-07	0.14404	NA	NA	88.6908
rs7005777	0.0186326	0.976977	0.0190864	2.86836e-06	0.851989	NA	NA	50.6015
rs150476682	0.142831	0.985747	-0.278732	6.48522e-06	0.819579	NA	NA	66.1187
rs182884588	0.048384	0.986561	-0.618283	1.10966e-05	0.148502	NA	NA	92.7424
rs114464446	0.048384	0.986561	-0.618283	1.10966e-05	0.148502	NA	NA	92.7424
rs117261313	0.093367	0.990687	-0.235992	6.46594e-06	0.846873	NA	NA	71.6519
rs145868200	0.093367	0.990687	-0.235992	6.46594e-06	0.846873	NA	NA	71.6519
rs139895115	0.0854741	0.991479	-0.240368	6.63115e-06	0.844142	NA	NA	73.7682
rs76250915.COSV60756928	-0.0101184	0.993621	0.0611951	1.6585e-06	0.771902	NA	NA	85.8113
rs144659455	0.0110602	0.998466	0.288831	6.35046e-07	0.765752	NA	NA	96.3119
JHU_3.102967266	0.000809235	0.999	-0.0187539	1.70395e-06	0.857822	NA	NA	95.8635

## Sheet: PicVocab
SNP	Direct Effect	P-value of DE	Indirect effect	p-value of beta_k	p-value of alpha_k	p-value of beta_l	p-value of alpha_l	Percentage of Global effect explained by connectome
rs149111244	-12.061	0.00118645	1.39801	3.99498e-06	0.0159571	NA	NA	10.3872
rs117384094	-8.33912	0.0034804	1.13267	7.71435e-07	0.0176553	NA	NA	11.9583
rs17402704	-2.29408	0.00462967	0.0702071	1.72688e-05	0.55115	NA	NA	2.96948
rs76566630	-3.17996	0.0047546	0.0314386	1.23688e-05	0.850254	NA	NA	0.978971
rs79993170	-2.05723	0.00618988	0.278588	2.67768e-06	0.0195833	NA	NA	11.9268
rs73981631	5.36078	0.00693812	0.440377	1.32364e-05	0.13238	NA	NA	7.5912
rs9568202	2.54287	0.00702113	0.209211	1.33575e-05	0.132184	NA	NA	7.60192
rs79720263	5.36314	0.00855483	0.457132	1.19205e-05	0.130388	NA	NA	7.85414
rs12427819	2.95609	0.00888792	0.314887	3.4945e-08	0.134017	NA	NA	9.6267
rs78383629	-10.3937	0.00986619	0.084601	4.59049e-06	0.892374	NA	NA	0.807395
rs111660869	4.76487	0.00989694	-0.158567	1.3649e-05	0.559544	NA	NA	3.22067
rs72773922	-2.04827	0.0108254	0.068782	1.2867e-05	0.561927	NA	NA	3.24895
rs72773923	-2.04827	0.0108254	0.068782	1.2867e-05	0.561927	NA	NA	3.24895
rs72773932	-2.04827	0.0108254	0.068782	1.2867e-05	0.561927	NA	NA	3.24895
rs11750934	-2.04827	0.0108254	0.068782	1.2867e-05	0.561927	NA	NA	3.24895
rs11738810	-2.04827	0.0108254	0.068782	1.2867e-05	0.561927	NA	NA	3.24895
rs11748519	-2.04827	0.0108254	0.068782	1.2867e-05	0.561927	NA	NA	3.24895
rs11743410	-2.04827	0.0108254	0.068782	1.2867e-05	0.561927	NA	NA	3.24895
rs10515249	-2.04827	0.0108254	0.068782	1.2867e-05	0.561927	NA	NA	3.24895
rs72773924	-2.04041	0.0111829	0.0682956	1.27432e-05	0.565353	NA	NA	3.23874
rs61956274	-15.9691	0.0114247	1.94984	9.25089e-06	0.0427028	NA	NA	10.8814
rs56319744	-2.02633	0.0117358	0.0595399	1.01723e-05	0.620027	NA	NA	2.85445
rs72773947	-2.02139	0.0119518	0.061556	1.11475e-05	0.606882	NA	NA	2.95524
rs114006288	-2.20617	0.0126971	0.118364	6.05568e-06	0.399267	NA	NA	5.09197
rs114744690	7.45781	0.012933	0.697548	6.14826e-06	0.128526	NA	NA	8.55325
rs201135092	2.63083	0.014183	0.248035	7.93735e-06	0.126058	NA	NA	8.61571
rs75067820	-21.9215	0.0144973	2.32783	2.31282e-06	0.307793	6.46835e-06	0.00932043	9.59958
rs185478723	-21.8126	0.0146675	2.20101	2.56296e-06	0.369412	7.26989e-06	0.0159293	9.16568
rs187863221	-21.6618	0.0152377	2.58485	2.5305e-06	0.320336	6.12926e-06	0.00607691	10.6607
rs144036672	-21.6969	0.0156875	2.32759	2.28255e-06	0.363851	6.12665e-06	0.0130731	9.68839
rs117005966	-21.5413	0.0164834	2.17706	2.32243e-06	0.38659	6.09578e-06	0.0196222	9.1788
rs144809614	-21.467	0.0164987	2.36556	2.41709e-06	0.352417	6.06883e-06	0.0113463	9.92577
rs150113374	-21.4819	0.0165388	2.22901	2.35395e-06	0.34083	6.92502e-06	0.0131788	9.40081
rs79799102.COSV50773771	-21.475	0.0165569	2.37677	2.46753e-06	0.336024	6.00826e-06	0.0102127	9.96473
rs151188154	-21.4205	0.016654	2.22761	2.91319e-06	0.305681	5.69546e-06	0.0118074	9.41983
rs117187571	-21.3936	0.0169556	2.27429	2.44532e-06	0.338182	6.12873e-06	0.0124414	9.6092
rs79168666	-21.401	0.0169718	2.30839	2.39107e-06	0.319032	6.17487e-06	0.0104429	9.73619
rs117199719	-21.3741	0.0170306	2.27625	2.4367e-06	0.327092	6.03083e-06	0.0116173	9.62463
rs117103348	-21.3741	0.0170306	2.27625	2.4367e-06	0.327092	6.03083e-06	0.0116173	9.62463
rs183179229	-21.3741	0.0170306	2.27625	2.4367e-06	0.327092	6.03083e-06	0.0116173	9.62463
rs80052321	-21.3741	0.0170306	2.27625	2.4367e-06	0.327092	6.03083e-06	0.0116173	9.62463
rs1107711	-21.3741	0.0170306	2.27625	2.4367e-06	0.327092	6.03083e-06	0.0116173	9.62463
rs143071035	-21.3741	0.0170306	2.27625	2.4367e-06	0.327092	6.03083e-06	0.0116173	9.62463
rs143938519	-21.3741	0.0170306	2.27625	2.4367e-06	0.327092	6.03083e-06	0.0116173	9.62463
rs141273274.COSV62292497	-21.3741	0.0170306	2.27625	2.4367e-06	0.327092	6.03083e-06	0.0116173	9.62463
rs77836279	-21.3889	0.0170378	2.29823	2.50242e-06	0.340453	6.19113e-06	0.012102	9.70241
rs117742494	-21.3451	0.0172135	2.32549	2.63341e-06	0.336364	6.5126e-06	0.0110277	9.82439
rs137938953	-21.352	0.0172452	2.32962	2.78138e-06	0.33481	6.47988e-06	0.0110141	9.83727
rs138680262	-21.3329	0.0172633	2.21626	2.4392e-06	0.307493	6.1238e-06	0.0115046	9.41119
rs865866266.COSV63596753	-21.3277	0.017407	2.27684	2.5029e-06	0.323979	5.99799e-06	0.0116401	9.64578
rs143116789	-21.294	0.0174989	2.24461	2.34597e-06	0.319162	5.94184e-06	0.0117923	9.53587
rs185781921	-21.2831	0.0175286	2.2218	2.45737e-06	0.2927	6.39207e-06	0.0102848	9.45249
rs149181623	-21.3346	0.0176337	2.23905	2.40722e-06	0.343338	6.30812e-06	0.0139338	9.4981
rs2234322	-21.2007	0.0178177	2.06464	2.4078e-06	0.30189	6.08399e-06	0.0147141	8.87434
rs148734707	-21.2937	0.0179876	2.34275	2.89957e-06	0.31525	4.90158e-06	0.0107923	9.91158
rs138291276	-6.89616	0.0179956	1.15556	3.45763e-07	0.0214281	NA	NA	14.3517
rs184384228	-21.1791	0.0187174	2.11554	2.1452e-06	0.362919	4.27765e-06	0.0219538	9.08166
rs77880877	-21.0106	0.0187303	2.39118	2.80258e-06	0.376949	6.2674e-06	0.0124053	10.2179
rs150043005	-21.0658	0.0187937	2.47987	2.39431e-06	0.350786	6.11749e-06	0.00909362	10.5322
rs148242667	-21.152	0.0188931	2.41156	1.71736e-06	0.394507	5.32558e-06	0.0134538	10.2343
rs117776875	-21.0333	0.0189361	2.08233	2.24865e-06	0.371834	6.26303e-06	0.0213798	9.00833
rs72773968.COSV99031664	-1.8541	0.0190116	0.0640432	1.31046e-05	0.58273	NA	NA	3.33881
rs72773968.COSV99031664.1	-1.8541	0.0190116	0.0640432	1.31046e-05	0.58273	NA	NA	3.33881
rs192779211	-21.079	0.0190376	2.23096	2.56331e-06	0.321539	6.06729e-06	0.0124787	9.57085
rs140812674	-21.1111	0.0190467	2.42312	1.89746e-06	0.374628	5.72847e-06	0.0118308	10.2962
rs55691845	-21.0685	0.0192428	2.22081	3.0467e-06	0.340828	6.59253e-06	0.0143197	9.53576
rs77536728	-10.4618	0.0192461	1.23102	1.69126e-06	0.303012	3.89671e-06	0.00790794	10.528
rs79286480	-20.9722	0.0195063	1.99447	2.69643e-06	0.328993	7.39342e-06	0.0187864	8.68421
rs190672052	-20.9722	0.0195063	1.99447	2.69643e-06	0.328993	7.39342e-06	0.0187864	8.68421
rs117559981	-21.0085	0.0195423	2.28682	2.19621e-06	0.368739	6.17916e-06	0.0144052	9.81663
rs146874325	-20.9957	0.0197395	2.31161	1.9606e-06	0.348196	5.88476e-06	0.0123938	9.91796
rs149091338	-20.9677	0.0198967	2.36185	2.47853e-06	0.349022	6.21027e-06	0.0116284	10.1239
rs117574481	-20.9613	0.0199433	2.19737	2.79679e-06	0.338468	6.09725e-06	0.0152264	9.4883
rs148032509	-20.9275	0.0199944	2.39557	2.34849e-06	0.377799	6.52005e-06	0.0124338	10.2712
rs75827462	-20.9077	0.0200315	2.3682	2.29123e-06	0.380145	6.17552e-06	0.0131971	10.1745
rs186141507	-20.9221	0.0200595	2.39269	2.27716e-06	0.405341	6.46256e-06	0.0143614	10.2625
rs144309472	-20.9439	0.0201084	2.43803	2.07788e-06	0.371447	5.31067e-06	0.0117636	10.427
rs138881320	-20.893	0.0201528	2.42584	2.69162e-06	0.384572	6.6688e-06	0.0121665	10.4029
rs76887459	-20.7037	0.020208	2.22882	2.344e-06	0.34089	6.45832e-06	0.0132088	9.71907
rs73971620	-20.8745	0.0202198	2.39301	2.34768e-06	0.355082	5.03753e-06	0.0118489	10.2847
rs75535700	-20.839	0.0203269	2.28925	2.36864e-06	0.360208	6.29269e-06	0.0136282	9.89807
rs184593433	-20.8628	0.0205125	2.24874	2.71269e-06	0.325651	6.09466e-06	0.0126304	9.72993
rs79925682	-20.8419	0.0205621	2.3403	2.2876e-06	0.373134	6.17305e-06	0.0134143	10.0953
rs117190498	-20.848	0.0206177	2.20675	2.79165e-06	0.323925	5.73385e-06	0.0137905	9.57177
rs151161585	11.854	0.0206523	1.2149	5.59979e-06	0.12268	NA	NA	9.29613
rs188134673	-20.8315	0.0206801	2.31391	2.13861e-06	0.371156	6.02132e-06	0.0139423	9.99726
rs149299681	-20.8218	0.0207038	2.33644	2.35159e-06	0.361409	6.12927e-06	0.0127273	10.089
rs147531075	-20.8157	0.0207057	2.26529	2.35077e-06	0.356353	5.96686e-06	0.0142664	9.81453
rs76377725	-20.8442	0.0207316	2.22446	2.36644e-06	0.322617	4.98267e-06	0.0136608	9.64281
rs146980592	-20.7981	0.0208216	2.31098	2.41956e-06	0.357614	6.32596e-06	0.0130283	10.0003
rs142910242.COSV72155897	-20.8597	0.0208373	2.28212	2.59029e-06	0.394623	6.7841e-06	0.0171405	9.86143
rs150966442	-20.7964	0.0208849	2.28207	2.3055e-06	0.35802	6.13284e-06	0.0138231	9.88832
rs117503332.COSV60212053	-20.7554	0.0209497	2.27027	2.37145e-06	0.385619	6.30897e-06	0.016243	9.85974
rs56071233.COSV59894748.COSV60371613	-20.7966	0.0209506	2.22768	2.2273e-06	0.33589	4.33029e-06	0.0150055	9.67537
rs77181098	-20.8005	0.0209535	2.31162	2.27837e-06	0.346306	6.44492e-06	0.0121611	10.0018
rs186915205	-20.7647	0.0209758	2.29267	2.39224e-06	0.362412	6.34831e-06	0.0137696	9.94334
rs75249371	-20.7715	0.0209909	2.34057	2.41327e-06	0.345807	6.49363e-06	0.0114141	10.127
rs141044095	-20.7537	0.0210109	2.28116	2.38333e-06	0.440371	6.29685e-06	0.0210509	9.90311
rs144317872	-10.3839	0.0210139	1.11938	2.40993e-06	0.344942	6.36067e-06	0.0138525	9.73097
rs184326825	-20.7401	0.0210306	2.18518	2.42658e-06	0.314983	6.45787e-06	0.0127421	9.53176
rs11576002	-20.7634	0.0210454	2.3013	2.40901e-06	0.370901	6.43785e-06	0.0142161	9.97759
rs61422983	-20.7696	0.0210481	2.2321	2.31639e-06	0.361192	6.42477e-06	0.0152455	9.70408
rs149234190	-20.7633	0.0210676	2.25081	2.35656e-06	0.360894	6.33269e-06	0.0147809	9.78014
rs186310727	-20.7578	0.0211005	2.21991	2.39284e-06	0.351441	6.38682e-06	0.01482	9.66113
rs117771000	-20.7581	0.0211345	2.25183	2.37401e-06	0.350124	6.39716e-06	0.01391	9.78635
rs77074472	-20.6896	0.0211399	2.18596	2.37159e-06	0.312255	6.32637e-06	0.0124279	9.55585
rs150282841	-20.7444	0.0211435	2.27058	2.37236e-06	0.382544	6.2775e-06	0.0160865	9.86566
rs80185227	-20.7527	0.0211475	2.23851	2.38188e-06	0.35141	6.32474e-06	0.0143672	9.73636
rs76009440	-20.7478	0.0211544	2.24489	2.37747e-06	0.359014	6.32906e-06	0.0148005	9.76348
rs143151647	-20.749	0.0211567	2.26479	2.38497e-06	0.363383	6.34223e-06	0.0146165	9.84102
rs140644633	-20.7541	0.021162	2.24807	2.33393e-06	0.353833	6.2684e-06	0.0143173	9.77331
rs191689936	-20.7292	0.0211756	2.18506	2.46756e-06	0.353692	6.54968e-06	0.0159319	9.53582
rs78594119	-20.7577	0.0211767	2.23791	2.42815e-06	0.329986	6.33663e-06	0.0128388	9.73191
rs188669982	-10.3793	0.0211783	1.11869	2.43524e-06	0.342823	6.18834e-06	0.0139328	9.72941
rs148417898	-20.7653	0.0211815	2.23092	2.43182e-06	0.359377	6.49662e-06	0.0152786	9.70124
rs117483918	-20.7477	0.0211869	2.23626	2.3492e-06	0.359949	6.3388e-06	0.0151193	9.72965
rs143273711	-20.7488	0.0211931	2.24989	2.35788e-06	0.354582	6.31376e-06	0.0143089	9.78265
rs150530277	-20.7488	0.0211931	2.24989	2.35788e-06	0.354582	6.31376e-06	0.0143089	9.78265
rs139634219	-20.675	0.0211941	2.15853	2.65513e-06	0.342027	5.82873e-06	0.0162201	9.45332
rs141397086	-20.7446	0.0212003	2.23216	2.38987e-06	0.349019	6.33079e-06	0.0143439	9.71484
rs185644300	-20.7457	0.0212018	2.2437	2.38175e-06	0.35209	6.32095e-06	0.0142914	9.75971
rs117935213	-10.3675	0.0212069	1.11694	2.3557e-06	0.349632	6.25172e-06	0.0143228	9.72574
rs181280920	-10.3675	0.0212069	1.11694	2.3557e-06	0.349632	6.25172e-06	0.0143228	9.72574
rs140522028	-10.3675	0.0212069	1.11694	2.3557e-06	0.349632	6.25172e-06	0.0143228	9.72574
rs181142071.COSV64861078.COSV64862661	-20.7349	0.0212069	2.23389	2.3557e-06	0.349632	6.25172e-06	0.0143228	9.72574
rs4292924	-20.7349	0.0212069	2.23389	2.3557e-06	0.349632	6.25172e-06	0.0143228	9.72574
rs77317573	-20.7349	0.0212069	2.23389	2.3557e-06	0.349632	6.25172e-06	0.0143228	9.72574
rs200567044	-20.7349	0.0212069	2.23389	2.3557e-06	0.349632	6.25172e-06	0.0143228	9.72574
rs142598707	-20.7349	0.0212069	2.23389	2.3557e-06	0.349632	6.25172e-06	0.0143228	9.72574
rs201041009	-20.7349	0.0212069	2.23389	2.3557e-06	0.349632	6.25172e-06	0.0143228	9.72574
rs201172117	-20.7349	0.0212069	2.23389	2.3557e-06	0.349632	6.25172e-06	0.0143228	9.72574
rs190431418	-20.7349	0.0212069	2.23389	2.3557e-06	0.349632	6.25172e-06	0.0143228	9.72574
rs77827945	-20.7349	0.0212069	2.23389	2.3557e-06	0.349632	6.25172e-06	0.0143228	9.72574
rs144503839	-20.7349	0.0212069	2.23389	2.3557e-06	0.349632	6.25172e-06	0.0143228	9.72574
rs77599424	-20.7349	0.0212069	2.23389	2.3557e-06	0.349632	6.25172e-06	0.0143228	9.72574
rs201729184	-20.7349	0.0212069	2.23389	2.3557e-06	0.349632	6.25172e-06	0.0143228	9.72574
rs79007764	-20.7349	0.0212069	2.23389	2.3557e-06	0.349632	6.25172e-06	0.0143228	9.72574
rs182566496.COSV63121351	-20.7349	0.0212069	2.23389	2.3557e-06	0.349632	6.25172e-06	0.0143228	9.72574
rs74953085.COSV99609448	-20.7349	0.0212069	2.23389	2.3557e-06	0.349632	6.25172e-06	0.0143228	9.72574
rs143595907.COSV60739243	-20.7349	0.0212069	2.23389	2.3557e-06	0.349632	6.25172e-06	0.0143228	9.72574
rs144676974.COSV52969184	-20.7349	0.0212069	2.23389	2.3557e-06	0.349632	6.25172e-06	0.0143228	9.72574
rs118167062	-20.7349	0.0212069	2.23389	2.3557e-06	0.349632	6.25172e-06	0.0143228	9.72574
rs148899322	-20.7349	0.0212069	2.23389	2.3557e-06	0.349632	6.25172e-06	0.0143228	9.72574
rs75112076	-20.7349	0.0212069	2.23389	2.3557e-06	0.349632	6.25172e-06	0.0143228	9.72574
rs117413433	-20.7349	0.0212069	2.23389	2.3557e-06	0.349632	6.25172e-06	0.0143228	9.72574
rs182564806	-20.7349	0.0212069	2.23389	2.3557e-06	0.349632	6.25172e-06	0.0143228	9.72574
rs79237112	-20.7349	0.0212069	2.23389	2.3557e-06	0.349632	6.25172e-06	0.0143228	9.72574
rs117085377	-20.7349	0.0212069	2.23389	2.3557e-06	0.349632	6.25172e-06	0.0143228	9.72574
rs74333008	-20.7349	0.0212069	2.23389	2.3557e-06	0.349632	6.25172e-06	0.0143228	9.72574
rs118128212	-20.7349	0.0212069	2.23389	2.3557e-06	0.349632	6.25172e-06	0.0143228	9.72574
rs140547244	-20.7349	0.0212069	2.23389	2.3557e-06	0.349632	6.25172e-06	0.0143228	9.72574
rs141553115	-20.7349	0.0212069	2.23389	2.3557e-06	0.349632	6.25172e-06	0.0143228	9.72574
rs373883681	-20.7349	0.0212069	2.23389	2.3557e-06	0.349632	6.25172e-06	0.0143228	9.72574
rs183686803	-20.7349	0.0212069	2.23389	2.3557e-06	0.349632	6.25172e-06	0.0143228	9.72574
rs75334178	-20.7349	0.0212069	2.23389	2.3557e-06	0.349632	6.25172e-06	0.0143228	9.72574
rs146138781	-20.7349	0.0212069	2.23389	2.3557e-06	0.349632	6.25172e-06	0.0143228	9.72574
rs182745218	-20.7349	0.0212069	2.23389	2.3557e-06	0.349632	6.25172e-06	0.0143228	9.72574
rs183961685	-20.7349	0.0212069	2.23389	2.3557e-06	0.349632	6.25172e-06	0.0143228	9.72574
rs117665794	-20.7349	0.0212069	2.23389	2.3557e-06	0.349632	6.25172e-06	0.0143228	9.72574
rs12616529	-20.7349	0.0212069	2.23389	2.3557e-06	0.349632	6.25172e-06	0.0143228	9.72574
rs145285676	-20.7349	0.0212069	2.23389	2.3557e-06	0.349632	6.25172e-06	0.0143228	9.72574
rs76455076.COSV71375001	-20.7349	0.0212069	2.23389	2.3557e-06	0.349632	6.25172e-06	0.0143228	9.72574
rs199998986.COSV57492773	-20.7349	0.0212069	2.23389	2.3557e-06	0.349632	6.25172e-06	0.0143228	9.72574
rs75460542	-20.7349	0.0212069	2.23389	2.3557e-06	0.349632	6.25172e-06	0.0143228	9.72574
rs141981259	-20.7349	0.0212069	2.23389	2.3557e-06	0.349632	6.25172e-06	0.0143228	9.72574
rs79396968	-20.7349	0.0212069	2.23389	2.3557e-06	0.349632	6.25172e-06	0.0143228	9.72574
rs138029084	-20.7349	0.0212069	2.23389	2.3557e-06	0.349632	6.25172e-06	0.0143228	9.72574
rs145942849	-20.7349	0.0212069	2.23389	2.3557e-06	0.349632	6.25172e-06	0.0143228	9.72574
rs140048660	-20.7349	0.0212069	2.23389	2.3557e-06	0.349632	6.25172e-06	0.0143228	9.72574
rs78769695	-20.7349	0.0212069	2.23389	2.3557e-06	0.349632	6.25172e-06	0.0143228	9.72574
rs74323520	-20.7349	0.0212069	2.23389	2.3557e-06	0.349632	6.25172e-06	0.0143228	9.72574
rs77410040	-20.7349	0.0212069	2.23389	2.3557e-06	0.349632	6.25172e-06	0.0143228	9.72574
rs77776626	-20.7349	0.0212069	2.23389	2.3557e-06	0.349632	6.25172e-06	0.0143228	9.72574
rs55944080.COSV51420832	-20.7349	0.0212069	2.23389	2.3557e-06	0.349632	6.25172e-06	0.0143228	9.72574
rs147394705	-20.7349	0.0212069	2.23389	2.3557e-06	0.349632	6.25172e-06	0.0143228	9.72574
rs151269764	-20.7349	0.0212069	2.23389	2.3557e-06	0.349632	6.25172e-06	0.0143228	9.72574
rs201448153.COSV59509600.COSV59509654	-20.7349	0.0212069	2.23389	2.3557e-06	0.349632	6.25172e-06	0.0143228	9.72574
rs147928934	-20.7349	0.0212069	2.23389	2.3557e-06	0.349632	6.25172e-06	0.0143228	9.72574
rs146637751	-20.7349	0.0212069	2.23389	2.3557e-06	0.349632	6.25172e-06	0.0143228	9.72574
rs143727777	-20.7349	0.0212069	2.23389	2.3557e-06	0.349632	6.25172e-06	0.0143228	9.72574
rs80090047	-20.7349	0.0212069	2.23389	2.3557e-06	0.349632	6.25172e-06	0.0143228	9.72574
rs149935322	-20.7349	0.0212069	2.23389	2.3557e-06	0.349632	6.25172e-06	0.0143228	9.72574
rs76323370	-20.7349	0.0212069	2.23389	2.3557e-06	0.349632	6.25172e-06	0.0143228	9.72574
rs201455234	-20.7349	0.0212069	2.23389	2.3557e-06	0.349632	6.25172e-06	0.0143228	9.72574
rs192130640	-20.7349	0.0212069	2.23389	2.3557e-06	0.349632	6.25172e-06	0.0143228	9.72574
rs77068413	-20.7349	0.0212069	2.23389	2.3557e-06	0.349632	6.25172e-06	0.0143228	9.72574
rs76983277	-20.7349	0.0212069	2.23389	2.3557e-06	0.349632	6.25172e-06	0.0143228	9.72574
rs140374255	-20.7349	0.0212069	2.23389	2.3557e-06	0.349632	6.25172e-06	0.0143228	9.72574
rs79012420	-20.7349	0.0212069	2.23389	2.3557e-06	0.349632	6.25172e-06	0.0143228	9.72574
rs144738175	-20.7349	0.0212069	2.23389	2.3557e-06	0.349632	6.25172e-06	0.0143228	9.72574
rs142272086	-20.7349	0.0212069	2.23389	2.3557e-06	0.349632	6.25172e-06	0.0143228	9.72574
rs77247585	-20.7349	0.0212069	2.23389	2.3557e-06	0.349632	6.25172e-06	0.0143228	9.72574
rs200773812.COSV55788901	-20.7349	0.0212069	2.23389	2.3557e-06	0.349632	6.25172e-06	0.0143228	9.72574
rs144418856	-20.7349	0.0212069	2.23389	2.3557e-06	0.349632	6.25172e-06	0.0143228	9.72574
rs143766660	-20.7349	0.0212069	2.23389	2.3557e-06	0.349632	6.25172e-06	0.0143228	9.72574
rs149138836	-20.7349	0.0212069	2.23389	2.3557e-06	0.349632	6.25172e-06	0.0143228	9.72574
rs150102589	-20.7349	0.0212069	2.23389	2.3557e-06	0.349632	6.25172e-06	0.0143228	9.72574
rs77295369	-20.7349	0.0212069	2.23389	2.3557e-06	0.349632	6.25172e-06	0.0143228	9.72574
rs139345209	-20.7349	0.0212069	2.23389	2.3557e-06	0.349632	6.25172e-06	0.0143228	9.72574
rs140133635	-20.7349	0.0212069	2.23389	2.3557e-06	0.349632	6.25172e-06	0.0143228	9.72574
rs74758811	-20.7349	0.0212069	2.23389	2.3557e-06	0.349632	6.25172e-06	0.0143228	9.72574
rs188215829	-20.7349	0.0212069	2.23389	2.3557e-06	0.349632	6.25172e-06	0.0143228	9.72574
Variant13197	-20.7349	0.0212069	2.23389	2.3557e-06	0.349632	6.25172e-06	0.0143228	9.72574
rs141590348	-20.7349	0.0212069	2.23389	2.3557e-06	0.349632	6.25172e-06	0.0143228	9.72574
rs150126545	-20.7349	0.0212069	2.23389	2.3557e-06	0.349632	6.25172e-06	0.0143228	9.72574
rs145282515	-20.7349	0.0212069	2.23389	2.3557e-06	0.349632	6.25172e-06	0.0143228	9.72574
rs190167587	-20.7349	0.0212069	2.23389	2.3557e-06	0.349632	6.25172e-06	0.0143228	9.72574
rs143811334	-20.7349	0.0212069	2.23389	2.3557e-06	0.349632	6.25172e-06	0.0143228	9.72574
rs118181921	-20.7349	0.0212069	2.23389	2.3557e-06	0.349632	6.25172e-06	0.0143228	9.72574
rs145940614	-20.7349	0.0212069	2.23389	2.3557e-06	0.349632	6.25172e-06	0.0143228	9.72574
rs146195485	-20.7349	0.0212069	2.23389	2.3557e-06	0.349632	6.25172e-06	0.0143228	9.72574
rs117103332	-20.7349	0.0212069	2.23389	2.3557e-06	0.349632	6.25172e-06	0.0143228	9.72574
rs188760100	-20.7349	0.0212069	2.23389	2.3557e-06	0.349632	6.25172e-06	0.0143228	9.72574
rs140894340	-20.7349	0.0212069	2.23389	2.3557e-06	0.349632	6.25172e-06	0.0143228	9.72574
rs117105033	-20.7349	0.0212069	2.23389	2.3557e-06	0.349632	6.25172e-06	0.0143228	9.72574
rs78577254	-20.7349	0.0212069	2.23389	2.3557e-06	0.349632	6.25172e-06	0.0143228	9.72574
rs181047361	-20.7349	0.0212069	2.23389	2.3557e-06	0.349632	6.25172e-06	0.0143228	9.72574
rs756274300	-20.7349	0.0212069	2.23389	2.3557e-06	0.349632	6.25172e-06	0.0143228	9.72574
rs138294595	-20.7349	0.0212069	2.23389	2.3557e-06	0.349632	6.25172e-06	0.0143228	9.72574
rs80017634	-20.7349	0.0212069	2.23389	2.3557e-06	0.349632	6.25172e-06	0.0143228	9.72574
rs117530837	-20.7349	0.0212069	2.23389	2.3557e-06	0.349632	6.25172e-06	0.0143228	9.72574
rs148624022	-20.7349	0.0212069	2.23389	2.3557e-06	0.349632	6.25172e-06	0.0143228	9.72574
rs144570135	-20.7349	0.0212069	2.23389	2.3557e-06	0.349632	6.25172e-06	0.0143228	9.72574
rs76125754	-20.7349	0.0212069	2.23389	2.3557e-06	0.349632	6.25172e-06	0.0143228	9.72574
rs185649024	-20.7349	0.0212069	2.23389	2.3557e-06	0.349632	6.25172e-06	0.0143228	9.72574
rs150765053	-20.7349	0.0212069	2.23389	2.3557e-06	0.349632	6.25172e-06	0.0143228	9.72574
rs189426448	-20.7349	0.0212069	2.23389	2.3557e-06	0.349632	6.25172e-06	0.0143228	9.72574
rs147128577	-20.7349	0.0212069	2.23389	2.3557e-06	0.349632	6.25172e-06	0.0143228	9.72574
rs180778692	-20.7349	0.0212069	2.23389	2.3557e-06	0.349632	6.25172e-06	0.0143228	9.72574
rs74551351	-20.7349	0.0212069	2.23389	2.3557e-06	0.349632	6.25172e-06	0.0143228	9.72574
rs149727107	-20.7349	0.0212069	2.23389	2.3557e-06	0.349632	6.25172e-06	0.0143228	9.72574
rs118143777	-20.7349	0.0212069	2.23389	2.3557e-06	0.349632	6.25172e-06	0.0143228	9.72574
rs75137689	-20.7349	0.0212069	2.23389	2.3557e-06	0.349632	6.25172e-06	0.0143228	9.72574
rs149979103	-20.7349	0.0212069	2.23389	2.3557e-06	0.349632	6.25172e-06	0.0143228	9.72574
rs117277536	-20.7349	0.0212069	2.23389	2.3557e-06	0.349632	6.25172e-06	0.0143228	9.72574
rs117260329	-20.7349	0.0212069	2.23389	2.3557e-06	0.349632	6.25172e-06	0.0143228	9.72574
rs142274336	-20.7349	0.0212069	2.23389	2.3557e-06	0.349632	6.25172e-06	0.0143228	9.72574
rs143487881	-20.7349	0.0212069	2.23389	2.3557e-06	0.349632	6.25172e-06	0.0143228	9.72574
rs140363477.COSV100236629	-20.7349	0.0212069	2.23389	2.3557e-06	0.349632	6.25172e-06	0.0143228	9.72574
rs74854406	-20.7349	0.0212069	2.23389	2.3557e-06	0.349632	6.25172e-06	0.0143228	9.72574
rs117375884	-20.7349	0.0212069	2.23389	2.3557e-06	0.349632	6.25172e-06	0.0143228	9.72574
rs149508674	-20.7349	0.0212069	2.23389	2.3557e-06	0.349632	6.25172e-06	0.0143228	9.72574
rs151209421	-20.7349	0.0212069	2.23389	2.3557e-06	0.349632	6.25172e-06	0.0143228	9.72574
rs146453380	-20.7349	0.0212069	2.23389	2.3557e-06	0.349632	6.25172e-06	0.0143228	9.72574
rs78744268	-20.7349	0.0212069	2.23389	2.3557e-06	0.349632	6.25172e-06	0.0143228	9.72574
rs185957068	-20.7349	0.0212069	2.23389	2.3557e-06	0.349632	6.25172e-06	0.0143228	9.72574
rs117079685.COSV55929558	-20.7349	0.0212069	2.23389	2.3557e-06	0.349632	6.25172e-06	0.0143228	9.72574
rs145142382	-20.7349	0.0212069	2.23389	2.3557e-06	0.349632	6.25172e-06	0.0143228	9.72574
rs180815385	-20.7349	0.0212069	2.23389	2.3557e-06	0.349632	6.25172e-06	0.0143228	9.72574
rs148896862	-20.7349	0.0212069	2.23389	2.3557e-06	0.349632	6.25172e-06	0.0143228	9.72574
rs139842311	-20.7349	0.0212069	2.23389	2.3557e-06	0.349632	6.25172e-06	0.0143228	9.72574
rs75765505	-20.7349	0.0212069	2.23389	2.3557e-06	0.349632	6.25172e-06	0.0143228	9.72574
rs191798259	-20.7349	0.0212069	2.23389	2.3557e-06	0.349632	6.25172e-06	0.0143228	9.72574
rs118153056	-20.7349	0.0212069	2.23389	2.3557e-06	0.349632	6.25172e-06	0.0143228	9.72574
rs147615414	-20.7349	0.0212069	2.23389	2.3557e-06	0.349632	6.25172e-06	0.0143228	9.72574
rs149651310	-20.7349	0.0212069	2.23389	2.3557e-06	0.349632	6.25172e-06	0.0143228	9.72574
rs141307320	-20.7349	0.0212069	2.23389	2.3557e-06	0.349632	6.25172e-06	0.0143228	9.72574
rs117799556	-20.7349	0.0212069	2.23389	2.3557e-06	0.349632	6.25172e-06	0.0143228	9.72574
rs150315968	-20.7349	0.0212069	2.23389	2.3557e-06	0.349632	6.25172e-06	0.0143228	9.72574
rs138441090	-20.7349	0.0212069	2.23389	2.3557e-06	0.349632	6.25172e-06	0.0143228	9.72574
rs151109103	-20.7349	0.0212069	2.23389	2.3557e-06	0.349632	6.25172e-06	0.0143228	9.72574
rs75370842	-20.7349	0.0212069	2.23389	2.3557e-06	0.349632	6.25172e-06	0.0143228	9.72574
rs148227650	-20.7349	0.0212069	2.23389	2.3557e-06	0.349632	6.25172e-06	0.0143228	9.72574
rs139712737	-20.7349	0.0212069	2.23389	2.3557e-06	0.349632	6.25172e-06	0.0143228	9.72574
rs150642862	-20.7349	0.0212069	2.23389	2.3557e-06	0.349632	6.25172e-06	0.0143228	9.72574
rs77779332	-20.7349	0.0212069	2.23389	2.3557e-06	0.349632	6.25172e-06	0.0143228	9.72574
rs144469428	-20.7349	0.0212069	2.23389	2.3557e-06	0.349632	6.25172e-06	0.0143228	9.72574
rs11140726	-20.7349	0.0212069	2.23389	2.3557e-06	0.349632	6.25172e-06	0.0143228	9.72574
rs147137710	-20.7349	0.0212069	2.23389	2.3557e-06	0.349632	6.25172e-06	0.0143228	9.72574
rs117425040	-20.7349	0.0212069	2.23389	2.3557e-06	0.349632	6.25172e-06	0.0143228	9.72574
rs142477634	-20.7349	0.0212069	2.23389	2.3557e-06	0.349632	6.25172e-06	0.0143228	9.72574
rs144783598	-20.7349	0.0212069	2.23389	2.3557e-06	0.349632	6.25172e-06	0.0143228	9.72574
rs190411748	-20.7349	0.0212069	2.23389	2.3557e-06	0.349632	6.25172e-06	0.0143228	9.72574
rs79248107	-20.7349	0.0212069	2.23389	2.3557e-06	0.349632	6.25172e-06	0.0143228	9.72574
rs143950062	-20.7349	0.0212069	2.23389	2.3557e-06	0.349632	6.25172e-06	0.0143228	9.72574
rs76987497	-20.7349	0.0212069	2.23389	2.3557e-06	0.349632	6.25172e-06	0.0143228	9.72574
rs118011773	-20.7349	0.0212069	2.23389	2.3557e-06	0.349632	6.25172e-06	0.0143228	9.72574
rs144160411	-20.7349	0.0212069	2.23389	2.3557e-06	0.349632	6.25172e-06	0.0143228	9.72574
rs116922701	-20.7349	0.0212069	2.23389	2.3557e-06	0.349632	6.25172e-06	0.0143228	9.72574
rs56220353.CM045738.COSV64986786	-20.7349	0.0212069	2.23389	2.3557e-06	0.349632	6.25172e-06	0.0143228	9.72574
rs56220353.CM045738.COSV64986786.1	-20.7349	0.0212069	2.23389	2.3557e-06	0.349632	6.25172e-06	0.0143228	9.72574
rs150444603	-20.7349	0.0212069	2.23389	2.3557e-06	0.349632	6.25172e-06	0.0143228	9.72574
rs142798585	-20.7349	0.0212069	2.23389	2.3557e-06	0.349632	6.25172e-06	0.0143228	9.72574
rs143952224	-20.7349	0.0212069	2.23389	2.3557e-06	0.349632	6.25172e-06	0.0143228	9.72574
rs137867894	-20.7349	0.0212069	2.23389	2.3557e-06	0.349632	6.25172e-06	0.0143228	9.72574
rs77046859	-20.7349	0.0212069	2.23389	2.3557e-06	0.349632	6.25172e-06	0.0143228	9.72574
rs146728148	-20.7349	0.0212069	2.23389	2.3557e-06	0.349632	6.25172e-06	0.0143228	9.72574
rs142137211	-20.7349	0.0212069	2.23389	2.3557e-06	0.349632	6.25172e-06	0.0143228	9.72574
rs151136181	-20.7349	0.0212069	2.23389	2.3557e-06	0.349632	6.25172e-06	0.0143228	9.72574
rs7130798	-20.7349	0.0212069	2.23389	2.3557e-06	0.349632	6.25172e-06	0.0143228	9.72574
rs77991263	-20.7349	0.0212069	2.23389	2.3557e-06	0.349632	6.25172e-06	0.0143228	9.72574
rs146219330	-20.7349	0.0212069	2.23389	2.3557e-06	0.349632	6.25172e-06	0.0143228	9.72574
rs117186901	-20.7349	0.0212069	2.23389	2.3557e-06	0.349632	6.25172e-06	0.0143228	9.72574
rs149502247	-20.7349	0.0212069	2.23389	2.3557e-06	0.349632	6.25172e-06	0.0143228	9.72574
rs192998156	-20.7349	0.0212069	2.23389	2.3557e-06	0.349632	6.25172e-06	0.0143228	9.72574
rs187343931	-20.7349	0.0212069	2.23389	2.3557e-06	0.349632	6.25172e-06	0.0143228	9.72574
rs192586242.COSV100265713	-20.7349	0.0212069	2.23389	2.3557e-06	0.349632	6.25172e-06	0.0143228	9.72574
rs144093062	-20.7349	0.0212069	2.23389	2.3557e-06	0.349632	6.25172e-06	0.0143228	9.72574
rs144723667	-20.7349	0.0212069	2.23389	2.3557e-06	0.349632	6.25172e-06	0.0143228	9.72574
rs117997280	-20.7349	0.0212069	2.23389	2.3557e-06	0.349632	6.25172e-06	0.0143228	9.72574
rs147509777	-20.7349	0.0212069	2.23389	2.3557e-06	0.349632	6.25172e-06	0.0143228	9.72574
rs11568551	-20.7349	0.0212069	2.23389	2.3557e-06	0.349632	6.25172e-06	0.0143228	9.72574
rs148233198	-20.7349	0.0212069	2.23389	2.3557e-06	0.349632	6.25172e-06	0.0143228	9.72574
rs74979900	-20.7349	0.0212069	2.23389	2.3557e-06	0.349632	6.25172e-06	0.0143228	9.72574
rs142816804	-20.7349	0.0212069	2.23389	2.3557e-06	0.349632	6.25172e-06	0.0143228	9.72574
rs149349524	-20.7349	0.0212069	2.23389	2.3557e-06	0.349632	6.25172e-06	0.0143228	9.72574
rs17483502	-20.7349	0.0212069	2.23389	2.3557e-06	0.349632	6.25172e-06	0.0143228	9.72574
rs187666598	-20.7349	0.0212069	2.23389	2.3557e-06	0.349632	6.25172e-06	0.0143228	9.72574
rs151314243	-20.7349	0.0212069	2.23389	2.3557e-06	0.349632	6.25172e-06	0.0143228	9.72574
rs180744618	-20.7349	0.0212069	2.23389	2.3557e-06	0.349632	6.25172e-06	0.0143228	9.72574
rs78928914	-20.7349	0.0212069	2.23389	2.3557e-06	0.349632	6.25172e-06	0.0143228	9.72574
rs145719745	-20.7349	0.0212069	2.23389	2.3557e-06	0.349632	6.25172e-06	0.0143228	9.72574
rs138522332	-20.7349	0.0212069	2.23389	2.3557e-06	0.349632	6.25172e-06	0.0143228	9.72574
rs140372565.COSV57965275	-20.7349	0.0212069	2.23389	2.3557e-06	0.349632	6.25172e-06	0.0143228	9.72574
rs75308431.COSV59240455	-20.7349	0.0212069	2.23389	2.3557e-06	0.349632	6.25172e-06	0.0143228	9.72574
rs75308431.COSV59240455.1	-20.7349	0.0212069	2.23389	2.3557e-06	0.349632	6.25172e-06	0.0143228	9.72574
rs113125615.CM1618189.COSV57510955	-20.7349	0.0212069	2.23389	2.3557e-06	0.349632	6.25172e-06	0.0143228	9.72574
rs151149985	-20.7349	0.0212069	2.23389	2.3557e-06	0.349632	6.25172e-06	0.0143228	9.72574
rs187801483	-20.7349	0.0212069	2.23389	2.3557e-06	0.349632	6.25172e-06	0.0143228	9.72574
rs139236309	-20.7349	0.0212069	2.23389	2.3557e-06	0.349632	6.25172e-06	0.0143228	9.72574
rs150455908	-20.7349	0.0212069	2.23389	2.3557e-06	0.349632	6.25172e-06	0.0143228	9.72574
rs78821196	-20.7349	0.0212069	2.23389	2.3557e-06	0.349632	6.25172e-06	0.0143228	9.72574
rs138251806	-20.7349	0.0212069	2.23389	2.3557e-06	0.349632	6.25172e-06	0.0143228	9.72574
rs75783783	-20.7349	0.0212069	2.23389	2.3557e-06	0.349632	6.25172e-06	0.0143228	9.72574
rs147223470	-20.7349	0.0212069	2.23389	2.3557e-06	0.349632	6.25172e-06	0.0143228	9.72574
rs1345092	-20.7349	0.0212069	2.23389	2.3557e-06	0.349632	6.25172e-06	0.0143228	9.72574
rs150217370	-20.7349	0.0212069	2.23389	2.3557e-06	0.349632	6.25172e-06	0.0143228	9.72574
rs74820648	-20.7349	0.0212069	2.23389	2.3557e-06	0.349632	6.25172e-06	0.0143228	9.72574
rs145985541	-20.7349	0.0212069	2.23389	2.3557e-06	0.349632	6.25172e-06	0.0143228	9.72574
rs149915751	-20.7349	0.0212069	2.23389	2.3557e-06	0.349632	6.25172e-06	0.0143228	9.72574
rs183328539	-20.7349	0.0212069	2.23389	2.3557e-06	0.349632	6.25172e-06	0.0143228	9.72574
rs117938586	-20.7349	0.0212069	2.23389	2.3557e-06	0.349632	6.25172e-06	0.0143228	9.72574
rs9568147	-20.7349	0.0212069	2.23389	2.3557e-06	0.349632	6.25172e-06	0.0143228	9.72574
rs149949253	-20.7349	0.0212069	2.23389	2.3557e-06	0.349632	6.25172e-06	0.0143228	9.72574
rs140358575	-20.7349	0.0212069	2.23389	2.3557e-06	0.349632	6.25172e-06	0.0143228	9.72574
rs144842247	-20.7349	0.0212069	2.23389	2.3557e-06	0.349632	6.25172e-06	0.0143228	9.72574
rs117068479	-20.7349	0.0212069	2.23389	2.3557e-06	0.349632	6.25172e-06	0.0143228	9.72574
rs191179599	-20.7349	0.0212069	2.23389	2.3557e-06	0.349632	6.25172e-06	0.0143228	9.72574
rs201686630	-20.7349	0.0212069	2.23389	2.3557e-06	0.349632	6.25172e-06	0.0143228	9.72574
rs76936836	-20.7349	0.0212069	2.23389	2.3557e-06	0.349632	6.25172e-06	0.0143228	9.72574
rs117114387	-20.7349	0.0212069	2.23389	2.3557e-06	0.349632	6.25172e-06	0.0143228	9.72574
rs138008369	-20.7349	0.0212069	2.23389	2.3557e-06	0.349632	6.25172e-06	0.0143228	9.72574
rs74576923	-20.7349	0.0212069	2.23389	2.3557e-06	0.349632	6.25172e-06	0.0143228	9.72574
rs79367070	-20.7349	0.0212069	2.23389	2.3557e-06	0.349632	6.25172e-06	0.0143228	9.72574
rs80274596	-20.7349	0.0212069	2.23389	2.3557e-06	0.349632	6.25172e-06	0.0143228	9.72574
rs184674278	-20.7349	0.0212069	2.23389	2.3557e-06	0.349632	6.25172e-06	0.0143228	9.72574
rs142952191	-20.7349	0.0212069	2.23389	2.3557e-06	0.349632	6.25172e-06	0.0143228	9.72574
rs75812946	-20.7349	0.0212069	2.23389	2.3557e-06	0.349632	6.25172e-06	0.0143228	9.72574
rs117850114	-20.7349	0.0212069	2.23389	2.3557e-06	0.349632	6.25172e-06	0.0143228	9.72574
rs79641633	-20.7349	0.0212069	2.23389	2.3557e-06	0.349632	6.25172e-06	0.0143228	9.72574
rs180939683	-20.7349	0.0212069	2.23389	2.3557e-06	0.349632	6.25172e-06	0.0143228	9.72574
rs79275026	-20.7349	0.0212069	2.23389	2.3557e-06	0.349632	6.25172e-06	0.0143228	9.72574
rs145526987	-20.7349	0.0212069	2.23389	2.3557e-06	0.349632	6.25172e-06	0.0143228	9.72574
rs116753155.COSV55012489	-20.7349	0.0212069	2.23389	2.3557e-06	0.349632	6.25172e-06	0.0143228	9.72574
rs151314215	-20.7349	0.0212069	2.23389	2.3557e-06	0.349632	6.25172e-06	0.0143228	9.72574
rs139573892	-20.7349	0.0212069	2.23389	2.3557e-06	0.349632	6.25172e-06	0.0143228	9.72574
rs200236506.COSV101237223	-20.7349	0.0212069	2.23389	2.3557e-06	0.349632	6.25172e-06	0.0143228	9.72574
rs182444420	-20.7349	0.0212069	2.23389	2.3557e-06	0.349632	6.25172e-06	0.0143228	9.72574
rs145654017	-20.7349	0.0212069	2.23389	2.3557e-06	0.349632	6.25172e-06	0.0143228	9.72574
rs186631004	-20.7349	0.0212069	2.23389	2.3557e-06	0.349632	6.25172e-06	0.0143228	9.72574
rs76067459	-20.7349	0.0212069	2.23389	2.3557e-06	0.349632	6.25172e-06	0.0143228	9.72574
rs184997830	-20.7349	0.0212069	2.23389	2.3557e-06	0.349632	6.25172e-06	0.0143228	9.72574
rs149140245	-20.7349	0.0212069	2.23389	2.3557e-06	0.349632	6.25172e-06	0.0143228	9.72574
rs138607085	-20.7349	0.0212069	2.23389	2.3557e-06	0.349632	6.25172e-06	0.0143228	9.72574
rs143784778	-20.7349	0.0212069	2.23389	2.3557e-06	0.349632	6.25172e-06	0.0143228	9.72574
rs189310554	-20.7349	0.0212069	2.23389	2.3557e-06	0.349632	6.25172e-06	0.0143228	9.72574
rs77374713	-20.7349	0.0212069	2.23389	2.3557e-06	0.349632	6.25172e-06	0.0143228	9.72574
rs117221568	-20.7349	0.0212069	2.23389	2.3557e-06	0.349632	6.25172e-06	0.0143228	9.72574
rs2303978	-20.7349	0.0212069	2.23389	2.3557e-06	0.349632	6.25172e-06	0.0143228	9.72574
rs148636563	-20.7349	0.0212069	2.23389	2.3557e-06	0.349632	6.25172e-06	0.0143228	9.72574
rs147903466	-20.7349	0.0212069	2.23389	2.3557e-06	0.349632	6.25172e-06	0.0143228	9.72574
rs79914366	-20.7349	0.0212069	2.23389	2.3557e-06	0.349632	6.25172e-06	0.0143228	9.72574
rs142909525	-20.7349	0.0212069	2.23389	2.3557e-06	0.349632	6.25172e-06	0.0143228	9.72574
rs150972124	-20.7349	0.0212069	2.23389	2.3557e-06	0.349632	6.25172e-06	0.0143228	9.72574
rs138013990	-20.7349	0.0212069	2.23389	2.3557e-06	0.349632	6.25172e-06	0.0143228	9.72574
rs2288901	-20.7349	0.0212069	2.23389	2.3557e-06	0.349632	6.25172e-06	0.0143228	9.72574
rs150155929	-20.7349	0.0212069	2.23389	2.3557e-06	0.349632	6.25172e-06	0.0143228	9.72574
rs80119825	-20.7349	0.0212069	2.23389	2.3557e-06	0.349632	6.25172e-06	0.0143228	9.72574
rs140190524	-20.7349	0.0212069	2.23389	2.3557e-06	0.349632	6.25172e-06	0.0143228	9.72574
rs184959520	-20.7349	0.0212069	2.23389	2.3557e-06	0.349632	6.25172e-06	0.0143228	9.72574
rs139585754	-20.7349	0.0212069	2.23389	2.3557e-06	0.349632	6.25172e-06	0.0143228	9.72574
rs75974495	-20.7349	0.0212069	2.23389	2.3557e-06	0.349632	6.25172e-06	0.0143228	9.72574
rs188877536	-20.7349	0.0212069	2.23389	2.3557e-06	0.349632	6.25172e-06	0.0143228	9.72574
rs78093016	-20.7349	0.0212069	2.23389	2.3557e-06	0.349632	6.25172e-06	0.0143228	9.72574
rs147762749	-20.7349	0.0212069	2.23389	2.3557e-06	0.349632	6.25172e-06	0.0143228	9.72574
rs139987367	-20.7349	0.0212069	2.23389	2.3557e-06	0.349632	6.25172e-06	0.0143228	9.72574
rs79741302	-20.7349	0.0212069	2.23389	2.3557e-06	0.349632	6.25172e-06	0.0143228	9.72574
rs188561108	-20.7349	0.0212069	2.23389	2.3557e-06	0.349632	6.25172e-06	0.0143228	9.72574
rs148921170	-20.7349	0.0212069	2.23389	2.3557e-06	0.349632	6.25172e-06	0.0143228	9.72574
rs58563114	-20.7349	0.0212069	2.23389	2.3557e-06	0.349632	6.25172e-06	0.0143228	9.72574
rs17285869	-20.7349	0.0212069	2.23389	2.3557e-06	0.349632	6.25172e-06	0.0143228	9.72574
rs188342261	-20.7349	0.0212069	2.23389	2.3557e-06	0.349632	6.25172e-06	0.0143228	9.72574
rs142208865	-20.7349	0.0212069	2.23389	2.3557e-06	0.349632	6.25172e-06	0.0143228	9.72574
rs182040920	-20.7349	0.0212069	2.23389	2.3557e-06	0.349632	6.25172e-06	0.0143228	9.72574
rs138017670	-20.7451	0.0212139	2.24394	2.36946e-06	0.341776	6.03231e-06	0.0137652	9.76091
rs117121599	-20.7424	0.0212293	2.23257	2.37387e-06	0.352914	6.35037e-06	0.014636	9.71739
rs141985240	-20.7416	0.0212335	2.24167	2.35418e-06	0.358349	6.30962e-06	0.0148737	9.75348
rs145058362	-20.7263	0.0212359	2.25393	2.39584e-06	0.361461	6.32754e-06	0.0147433	9.80815
rs145926571	-20.7263	0.0212359	2.25393	2.39584e-06	0.361461	6.32754e-06	0.0147433	9.80815
rs74815459	-20.7263	0.0212359	2.25393	2.39584e-06	0.361461	6.32754e-06	0.0147433	9.80815
rs555684936	-20.7263	0.0212359	2.25393	2.39584e-06	0.361461	6.32754e-06	0.0147433	9.80815
rs144521331	-20.7263	0.0212359	2.25393	2.39584e-06	0.361461	6.32754e-06	0.0147433	9.80815
rs148274683	-20.7263	0.0212359	2.25393	2.39584e-06	0.361461	6.32754e-06	0.0147433	9.80815
rs186100104	-20.678	0.0212469	2.09327	2.34086e-06	0.338399	6.43056e-06	0.0174816	9.19258
rs117026171	-20.7335	0.0212556	2.23778	2.3847e-06	0.345157	6.32824e-06	0.0138874	9.74161
rs190093515	-20.7363	0.0212725	2.22749	2.3338e-06	0.355145	6.27782e-06	0.0150513	9.70004
rs149633810	-20.7362	0.0212751	2.23496	2.36571e-06	0.350758	6.32962e-06	0.0144087	9.72943
rs137953911	-20.7346	0.021279	2.23451	2.38078e-06	0.353981	6.30233e-06	0.0147207	9.7283
rs147172117	-20.7429	0.0212815	2.21985	2.4199e-06	0.349111	6.42071e-06	0.0146727	9.66718
rs76563030	-20.7487	0.0212819	2.24983	2.19009e-06	0.35901	6.30616e-06	0.0146245	9.78246
rs184867391	-20.7339	0.021288	2.23302	2.37733e-06	0.349063	6.32653e-06	0.0143363	9.72275
rs141195786	-20.7338	0.0212891	2.23328	2.38652e-06	0.350732	6.27248e-06	0.0145161	9.72381
rs145504401	-20.7338	0.0212891	2.23328	2.38652e-06	0.350732	6.27248e-06	0.0145161	9.72381
rs79045159	-20.73	0.0212899	2.22276	2.37608e-06	0.338825	6.30647e-06	0.013796	9.68407
rs117008532	-20.7342	0.0212914	2.23339	2.31207e-06	0.350064	6.28209e-06	0.014379	9.72406
rs80071398	-20.7355	0.0213041	2.24869	2.41085e-06	0.33967	6.40306e-06	0.0132231	9.78366
rs142431868	-20.7313	0.0213041	2.232	2.36316e-06	0.348189	6.35254e-06	0.014269	9.71985
rs148857836	-20.7306	0.0213061	2.21081	2.45337e-06	0.34587	6.49541e-06	0.0145522	9.63677
rs144818111	-20.7381	0.0213252	2.24272	2.41177e-06	0.352372	6.38291e-06	0.0144149	9.75911
rs145636984	-20.7263	0.0213318	2.22636	2.38719e-06	0.351454	6.26284e-06	0.0147549	9.69978
rs147493050.COSV50014553	-20.742	0.0213335	2.27514	2.5014e-06	0.368773	6.57294e-06	0.0148813	9.88457
rs145682657	-20.7251	0.0213411	2.21527	2.39327e-06	0.347346	6.3465e-06	0.0146271	9.65663
rs116968396	-20.7251	0.0213411	2.21527	2.39327e-06	0.347346	6.3465e-06	0.0146271	9.65663
rs147866708	-20.7373	0.0213467	2.23617	2.40413e-06	0.349749	6.21603e-06	0.0144621	9.7337
rs192527985	-20.7357	0.0213518	2.23055	2.39776e-06	0.349416	6.41761e-06	0.0144607	9.71229
rs117426093	-20.7128	0.0213618	2.21534	2.3875e-06	0.35405	6.28947e-06	0.015224	9.66209
rs139420309	-20.72	0.0213731	2.224	2.31801e-06	0.344823	6.33824e-06	0.0141821	9.69316
rs76720238	-10.3602	0.0213764	1.10759	2.29006e-06	0.344622	6.3462e-06	0.0143347	9.65827
rs75164447	-20.7101	0.0214107	2.21354	2.35632e-06	0.340511	6.32642e-06	0.0141203	9.65616
rs138583848	-20.6876	0.0214212	2.18867	2.34601e-06	0.316285	6.32565e-06	0.0127732	9.56744
rs59735373	-20.7197	0.0214444	2.23272	2.44867e-06	0.352378	6.44457e-06	0.0146338	9.7276
rs80232192	-20.6834	0.0214478	2.17956	2.37928e-06	0.340764	6.30785e-06	0.0150053	9.53315
rs11036480	-20.7039	0.021452	2.20297	2.26116e-06	0.325975	6.30205e-06	0.0132473	9.61705
rs80169186	-20.7029	0.0214614	2.20271	2.3814e-06	0.351345	6.19582e-06	0.0154211	9.61648
rs144903521	-20.6731	0.0214676	2.17539	2.3877e-06	0.366614	6.21658e-06	0.0175056	9.52095
rs75438846	-20.6731	0.0214676	2.17539	2.3877e-06	0.366614	6.21658e-06	0.0175056	9.52095
rs576801873	-20.6731	0.0214676	2.17539	2.3877e-06	0.366614	6.21658e-06	0.0175056	9.52095
rs9552960	-20.7169	0.0214859	2.21454	2.35537e-06	0.345847	6.46562e-06	0.0145895	9.65724
rs76502135	-20.6938	0.0214873	2.17383	2.35816e-06	0.329235	6.34789e-06	0.0141877	9.50615
rs191455113	-20.6938	0.0214873	2.17383	2.35816e-06	0.329235	6.34789e-06	0.0141877	9.50615
rs74469315	-20.6982	0.0214939	2.2114	2.36264e-06	0.347977	6.21492e-06	0.0148682	9.65272
rs117576669	-20.6903	0.0215224	2.19161	2.29195e-06	0.326253	6.32999e-06	0.0134988	9.5779
rs74727805	-20.6915	0.0215396	2.20552	2.33835e-06	0.34553	6.18876e-06	0.0148183	9.63231
rs200839338	-20.6909	0.0215453	2.20559	2.36295e-06	0.350758	6.06571e-06	0.0153792	9.63288
rs78779956	-20.7037	0.0215706	2.29102	1.85754e-06	0.362527	6.54553e-06	0.013433	9.96326
rs77325671	-20.702	0.0216032	2.29282	2.48459e-06	0.339196	6.60554e-06	0.012191	9.97104
rs147832263	-20.5582	0.0216157	2.08117	2.46644e-06	0.367745	6.41729e-06	0.020566	9.19269
rs144911751	-20.6722	0.0216228	2.22845	2.38417e-06	0.356955	6.29962e-06	0.0151258	9.73096
rs41299438	-20.6722	0.0216228	2.22845	2.38417e-06	0.356955	6.29962e-06	0.0151258	9.73096
rs193223899	-20.6627	0.021635	2.17464	2.44383e-06	0.38159	6.27176e-06	0.0190815	9.52227
rs141906400	-20.6648	0.0216723	2.15679	2.34811e-06	0.338534	6.21497e-06	0.0155055	9.45066
rs117876812	-20.6648	0.0216723	2.15679	2.34811e-06	0.338534	6.21497e-06	0.0155055	9.45066
rs184723631	-20.6473	0.0216769	2.2336	2.45603e-06	0.34936	6.63035e-06	0.0142057	9.76189
rs117813880	-20.6676	0.0216781	2.27017	2.60667e-06	0.35379	7.15351e-06	0.013319	9.8971
rs145539545	-20.683	0.0216914	2.24631	2.62908e-06	0.357355	6.33895e-06	0.0149567	9.79666
rs117599468	-20.6409	0.021781	2.22368	2.38106e-06	0.34974	6.27696e-06	0.0146263	9.72543
rs181201567	-20.5663	0.0218128	2.07156	2.38114e-06	0.359932	6.14981e-06	0.0201461	9.15085
rs78343152	-20.5663	0.0218128	2.07156	2.38114e-06	0.359932	6.14981e-06	0.0201461	9.15085
rs117929532	-10.3053	0.0218402	1.03056	2.39245e-06	0.349286	6.17237e-06	0.0195134	9.0911
rs150476682	-14.6548	0.0219757	2.23173	6.48522e-06	0.0224574	NA	NA	13.216
rs139895115	-14.6406	0.0220077	2.24849	6.63115e-06	0.0213146	NA	NA	13.3133
rs186502932	-20.6105	0.0220238	2.16395	2.08237e-06	0.350517	5.26231e-06	0.0172057	9.50167
rs11568551.1	-20.5913	0.0222241	2.11346	2.2854e-06	0.339676	5.85785e-06	0.0171261	9.30844
rs74446112	-20.5225	0.022275	2.15292	2.39361e-06	0.379477	5.95546e-06	0.0196846	9.49452
rs143972585	-20.5592	0.0222943	2.12846	2.31442e-06	0.325741	6.34831e-06	0.0150939	9.38158
rs12616529.1	-20.5464	0.0223581	1.99658	2.35419e-06	0.257674	6.41852e-06	0.0124864	8.85677
rs117261313	-14.6152	0.0223963	2.19732	6.46594e-06	0.0246145	NA	NA	13.0695
rs145868200	-14.6152	0.0223963	2.19732	6.46594e-06	0.0246145	NA	NA	13.0695
rs148681403	-20.5409	0.0225018	2.09717	2.29482e-06	0.31717	6.04741e-06	0.0154261	9.2639
rs142524381	-20.5187	0.0226028	2.11261	2.33854e-06	0.371809	4.82207e-06	0.0216642	9.33489
rs75717538	-20.5187	0.0226028	2.11261	2.33854e-06	0.371809	4.82207e-06	0.0216642	9.33489
rs146414283	-20.5004	0.0227222	1.99696	2.23655e-06	0.338392	5.18334e-06	0.0213743	8.87641
rs190410641	-20.4898	0.0228631	1.99576	2.26559e-06	0.338506	5.24441e-06	0.0214739	8.87575
rs117638546	-20.4499	0.0229683	2.0692	2.09205e-06	0.302458	6.29882e-06	0.0144473	9.18865
rs17128467	2.28118	0.0229835	0.26227	1.30542e-06	0.110326	NA	NA	10.3116
rs147001784	-20.4124	0.0233251	2.04558	2.12016e-06	0.303304	5.90542e-06	0.015538	9.10849
rs148634388	-20.2367	0.0241575	1.87554	1.94017e-06	0.254228	5.88666e-06	0.0149279	8.48189
rs116054196	-20.2637	0.024245	1.81534	3.30192e-06	0.439314	8.34236e-06	0.046293	8.22201
rs113713560	-7.67649	0.0245686	1.13658	1.09726e-05	0.0254569	NA	NA	12.8965
rs13188025	3.92521	0.0262061	0.412477	1.09732e-05	0.116569	NA	NA	9.50916
rs7882468	1.87145	0.0282389	0.214558	1.29057e-06	0.124422	NA	NA	10.2856
rs4877985	2.89651	0.0284079	0.304143	1.75342e-05	0.113552	NA	NA	9.50254
rs76232597	-5.55307	0.0287528	0.0670563	1.03774e-06	0.872873	NA	NA	1.19314
rs17028895	1.44402	0.0337302	-0.0106368	1.69498e-05	0.914447	NA	NA	0.731226
rs148134772	-13.6345	0.0340898	0.131991	1.02697e-05	0.890749	NA	NA	0.95878
rs149786280	-13.5953	0.0345403	0.10897	1.0477e-05	0.909541	NA	NA	0.795156
rs117059968	-13.5953	0.0345403	0.10897	1.0477e-05	0.909541	NA	NA	0.795156
rs188238736	-13.1635	0.0383481	1.27075	1.35614e-06	0.220997	NA	NA	8.8037
rs79047578	-13.1635	0.0383481	1.27075	1.35614e-06	0.220997	NA	NA	8.8037
rs1544279	-1.13803	0.0406593	0.122025	1.77339e-07	0.213319	NA	NA	9.6841
rs145458445	-6.08123	0.0446078	0.263552	1.26647e-06	0.595097	NA	NA	4.15383
rs145529594	-6.06414	0.0451032	0.242077	1.27539e-06	0.625361	NA	NA	3.83871
rs79021915	-7.0146	0.045258	0.0607874	3.92555e-06	0.911491	NA	NA	0.859139
rs79490573	10.1117	0.0496835	-0.368267	1.60879e-05	0.624442	NA	NA	3.51402
rs117950089	-8.85596	0.0508186	1.50616	7.0377e-06	0.0291877	NA	NA	14.5352
rs111347886	-9.94425	0.0542107	0.214843	3.49167e-06	0.792611	NA	NA	2.11478
rs28688016	4.56092	0.0558301	-0.233261	1.06547e-07	0.585713	NA	NA	4.8655
rs1986382	0.888905	0.0575519	0.10741	4.51778e-06	0.142082	NA	NA	10.7807
rs13026592	-0.800612	0.0601472	-0.100693	1.79313e-05	0.103772	NA	NA	11.1719
rs138843033	-8.54019	0.0609583	1.60606	2.12676e-06	0.0281629	NA	NA	15.8291
rs7880476	-0.770235	0.062786	-0.115986	7.98724e-07	0.093278	NA	NA	13.0877
rs13306653	-1.04386	0.0633127	0.0389112	1.60816e-05	0.63548	NA	NA	3.59366
rs5723.COSV55599716	-1.04386	0.0633127	0.0389112	1.60816e-05	0.63548	NA	NA	3.59366
rs5729	-1.04386	0.0633127	0.0389112	1.60816e-05	0.63548	NA	NA	3.59366
rs9922448	-1.04386	0.0633127	0.0389112	1.60816e-05	0.63548	NA	NA	3.59366
rs78337173	-2.13163	0.0646599	0.36447	1.73443e-05	0.0301917	NA	NA	14.6016
rs78337173.1	-2.12719	0.0652797	0.364497	1.71474e-05	0.0302186	NA	NA	14.6285
rs116785568	-8.29149	0.0660572	0.9494	2.31679e-07	0.228456	NA	NA	10.2739
rs117676762	-8.37377	0.0687291	0.139793	2.04823e-06	0.849996	NA	NA	1.642
rs138024882	-8.47308	0.0692179	0.0709082	1.58041e-06	0.925365	NA	NA	0.82992
rs76363034	-8.47308	0.0692179	0.0709082	1.58041e-06	0.925365	NA	NA	0.82992
rs149212121	-11.5707	0.0694828	1.71649	1.4404e-06	0.321721	7.5278e-07	0.0153797	12.9184
rs117020986	-4.24326	0.0752259	0.751905	1.64084e-05	0.0309204	NA	NA	15.0527
rs28449551	-7.75843	0.084861	1.41765	1.2583e-05	0.0336326	NA	NA	15.4494
rs114583383	-7.78122	0.0858766	0.969668	1.02873e-07	0.233743	NA	NA	11.0808
rs115895926	-7.78122	0.0858766	0.969668	1.02873e-07	0.233743	NA	NA	11.0808
rs79992884	-9.11989	0.0870249	0.0811033	5.01735e-07	0.928597	NA	NA	0.881462
rs8009460	2.65568	0.0911158	0.425283	3.71576e-06	0.0841581	NA	NA	13.8036
rs189390391	-10.8012	0.0912851	2.10552	1.05559e-05	0.0278666	NA	NA	16.3134
rs117392134	-10.7628	0.0925296	2.11118	1.00567e-05	0.0275886	NA	NA	16.3989
rs145455370	-10.7628	0.0928171	2.10358	9.84671e-06	0.028634	NA	NA	16.3494
rs73954229	-8.75961	0.0929249	1.02308	6.50742e-07	0.243434	NA	NA	10.4581
rs141668738	-10.7288	0.093584	2.05758	1.00014e-05	0.0317283	NA	NA	16.092
rs117389913	-10.7288	0.093584	2.05758	1.00014e-05	0.0317283	NA	NA	16.092
rs117131205	-10.7288	0.093584	2.05758	1.00014e-05	0.0317283	NA	NA	16.092
rs79663439	-10.7288	0.093584	2.05758	1.00014e-05	0.0317283	NA	NA	16.092
rs144299950	-10.7318	0.0936552	2.06268	1.01173e-05	0.0313965	NA	NA	16.1216
rs61735358.COSV99877644	4.28436	0.0961709	0.62772	1.35443e-05	0.0982561	NA	NA	12.7791
rs9342351	1.09257	0.0962228	-0.0434066	1.31818e-05	0.654165	NA	NA	3.82108
rs78958026	-8.75111	0.0992369	0.0355488	1.39008e-05	0.963715	NA	NA	0.404577
rs78023683	-10.4393	0.099405	0.0437198	8.97877e-06	0.963381	NA	NA	0.417054
rs75759688	-8.75264	0.0994831	0.0424511	1.39908e-05	0.956727	NA	NA	0.482668
rs142930187	-8.7383	0.0997252	0.0316156	1.37607e-05	0.967725	NA	NA	0.3605
rs138508820.COSV60194152.COSV60196257	-8.7383	0.0997252	0.0316156	1.37607e-05	0.967725	NA	NA	0.3605
rs138809000	-8.7383	0.0997252	0.0316156	1.37607e-05	0.967725	NA	NA	0.3605
rs75883103	-8.73916	0.0998681	0.0361307	1.3947e-05	0.963134	NA	NA	0.411732
rs73338617	-2.15086	0.102552	0.418197	1.20282e-05	0.0324148	NA	NA	16.2783
rs139966602	3.89788	0.102576	0.625283	2.153e-06	0.102923	NA	NA	13.824
rs147905017	-8.53623	0.107528	0.00608327	1.32128e-05	0.9938	NA	NA	0.0712134
rs115117038	-4.97416	0.10777	0.662559	6.66196e-08	0.240125	NA	NA	11.7543
rs117830285	-8.41421	0.113029	0.0100065	1.12442e-05	0.989893	NA	NA	0.118783
rs114357990	6.39132	0.116179	-0.274338	6.56972e-06	0.658475	NA	NA	4.11569
rs11572851	2.54493	0.117199	-0.0959527	6.29384e-06	0.699682	NA	NA	3.63335
rs17499798	-9.89929	0.118355	1.21479	7.45689e-07	0.252189	NA	NA	10.9302
rs17500264	-9.89929	0.118355	1.21479	7.45689e-07	0.252189	NA	NA	10.9302
rs139827215.COSV55097108	-9.90006	0.118548	1.2123	7.83482e-07	0.252808	NA	NA	10.9095
rs74742299	1.20855	0.12738	-0.0623913	1.25491e-06	0.631308	NA	NA	4.90908
rs112530541	3.69851	0.127691	-0.146213	9.47253e-06	0.689155	NA	NA	3.80296
rs149175148	-9.615	0.12865	1.95756	1.66971e-05	0.0340783	NA	NA	16.9155
rs28583993	2.33839	0.134021	-0.114911	1.18061e-06	0.65406	NA	NA	4.68395
rs74742299.1	1.1733	0.138649	-0.0582036	3.31968e-06	0.640977	NA	NA	4.72623
rs117237153	-6.62111	0.141519	0.0145362	7.4109e-06	0.983026	NA	NA	0.219063
rs535474272	-2.25713	0.146424	-0.0103554	4.55582e-06	0.965862	NA	NA	0.45669
rs144465232	-9.3046	0.147855	-0.0241585	5.58309e-07	0.982322	NA	NA	0.258968
rs76994284	-9.30473	0.148732	0.0619579	4.47649e-07	0.955079	NA	NA	0.661471
rs146800096	-9.29388	0.148989	0.0495989	4.45918e-07	0.963998	NA	NA	0.53084
rs751917604	-9.29388	0.148989	0.0495989	4.45918e-07	0.963998	NA	NA	0.53084
rs75101611	-9.29388	0.148989	0.0495989	4.45918e-07	0.963998	NA	NA	0.53084
rs202186196	-9.29388	0.148989	0.0495989	4.45918e-07	0.963998	NA	NA	0.53084
rs142160957	-9.29388	0.148989	0.0495989	4.45918e-07	0.963998	NA	NA	0.53084
rs148784679	-9.29388	0.148989	0.0495989	4.45918e-07	0.963998	NA	NA	0.53084
rs76347993	-9.22951	0.151728	0.0257734	4.45874e-07	0.981305	NA	NA	0.278472
rs112533857	3.82575	0.151752	-0.1953	5.35973e-06	0.63511	NA	NA	4.85694
rs5921578	1.1058	0.153067	0.0889099	2.60985e-08	0.540824	NA	NA	7.44197
rs146207088	-9.18256	0.153332	0.0479263	1.09122e-05	0.960135	NA	NA	0.519217
rs76311122	-1.99994	0.153532	0.00127936	1.64947e-05	0.995007	NA	NA	0.0639292
rs148968284	-9.16028	0.154075	0.012689	1.12292e-05	0.989414	NA	NA	0.13833
rs77776973	-3.81476	0.15421	0.00521191	8.53771e-06	0.989693	NA	NA	0.136439
rs79677861	-9.14995	0.154376	0.00960631	1.11179e-05	0.991982	NA	NA	0.104877
rs147420971	-9.14995	0.154376	0.00960631	1.11179e-05	0.991982	NA	NA	0.104877
rs117925630	-9.14995	0.154376	0.00960631	1.11179e-05	0.991982	NA	NA	0.104877
rs117455202	-9.14995	0.154376	0.00960631	1.11179e-05	0.991982	NA	NA	0.104877
rs141672178	-9.14995	0.154376	0.00960631	1.11179e-05	0.991982	NA	NA	0.104877
rs114047728	-7.58159	0.157135	1.19277	1.03957e-08	0.249157	NA	NA	13.5938
rs187428364	4.12685	0.158488	-0.190346	4.83782e-06	0.674234	NA	NA	4.40901
rs12307709	0.579869	0.15872	0.105009	7.59483e-06	0.0923993	NA	NA	15.3326
rs139270070	2.99488	0.159983	-0.126308	1.71664e-05	0.684008	NA	NA	4.04679
rs75627650	1.88253	0.162722	-0.423536	1.0723e-05	0.0353463	NA	NA	18.3661
exm2271703	0.572802	0.163055	0.102326	1.40026e-05	0.0905521	NA	NA	15.1565
rs6546272	0.634571	0.16441	-0.139415	1.78321e-05	0.0357815	NA	NA	18.0126
JHU_3.56847944	0.60236	0.166913	0.114731	3.62114e-06	0.0933148	NA	NA	15.9995
rs4468946	-0.953463	0.17442	0.214203	1.74775e-05	0.0361901	NA	NA	18.3445
rs78550505	1.34815	0.178363	1.18383e-05	9.52777e-06	0.999937	NA	NA	0.00087811
rs147531239.COSV104570516	5.9972	0.180134	-0.264199	1.31502e-05	0.689079	NA	NA	4.21948
rs79547784	-5.39634	0.18296	1.24771	1.36355e-05	0.0369427	NA	NA	18.7793
rs76108164	3.08284	0.185154	-0.142628	7.19903e-06	0.686594	NA	NA	4.42194
rs1990985	2.8758	0.187812	-0.159023	4.3727e-07	0.669767	NA	NA	5.23995
rs4580909	1.51546	0.18863	0.291237	1.22481e-05	0.0884651	NA	NA	16.1199
rs7433096	0.836368	0.190141	0.163706	8.71398e-06	0.088977	NA	NA	16.3694
rs77398130	2.71075	0.194448	-0.119279	1.66939e-05	0.695405	NA	NA	4.21476
rs113673946	2.20029	0.194875	-0.0963088	1.80244e-05	0.696073	NA	NA	4.19354
rs9596751	-0.938227	0.20073	0.227293	1.17497e-05	0.0369756	NA	NA	19.5014
JHU_4.102594138	0.534639	0.205692	0.114687	1.46307e-05	0.0659222	NA	NA	17.6625
rs148635749	-3.34236	0.207689	-0.0292167	5.61886e-07	0.94827	NA	NA	0.866559
rs76356005	-4.98795	0.217534	1.30417	5.04028e-06	0.0370959	NA	NA	20.727
rs1486830	-2.6475	0.224447	0.702103	4.98166e-06	0.0373508	NA	NA	20.9608
rs7005777	0.623174	0.228185	-0.170882	2.86836e-06	0.0371768	NA	NA	21.5201
rs116335195	4.16128	0.228315	-0.199356	8.79481e-06	0.701389	NA	NA	4.57172
rs111870807	-2.3153	0.228831	0.0472199	3.94414e-06	0.875344	NA	NA	1.99871
rs79250166	-2.39724	0.23069	0.451248	4.1085e-09	0.256089	NA	NA	15.8416
rs111509066	2.37584	0.234432	0.50475	1.53042e-05	0.0848638	NA	NA	17.5225
rs114192932	3.46666	0.23457	0.743454	1.24288e-05	0.0852625	NA	NA	17.6588
rs184215464	1.33537	0.236421	0.332649	1.17844e-06	0.0730071	NA	NA	19.9427
rs17134784	-1.9548	0.239431	0.30184	6.71563e-07	0.27985	NA	NA	13.3756
rs11998041	1.4747	0.245918	-0.0811089	7.36306e-06	0.674704	NA	NA	5.21331
rs76321912	1.22452	0.247025	0.00368206	4.79672e-06	0.982062	NA	NA	0.299793
rs191353566	5.11842	0.249242	1.15982	7.59786e-06	0.085231	NA	NA	18.4736
JHU_8.88692399	-0.555975	0.252153	0.152378	7.61851e-06	0.0385984	NA	NA	21.5116
rs61733089	3.47964	0.252315	-0.181303	3.76039e-06	0.70315	NA	NA	4.95237
rs148919436	-6.07111	0.253924	-0.00708788	5.37992e-07	0.993729	NA	NA	0.116612
rs77661219	-6.07111	0.253924	-0.00708788	5.37992e-07	0.993729	NA	NA	0.116612
rs115759450	-3.17816	0.259368	0.551803	9.09225e-08	0.278134	NA	NA	14.7938
rs145681254	-3.32135	0.260576	0.4951	1.41975e-06	0.305747	NA	NA	12.9728
rs77450464	-1.91188	0.26286	0.023557	1.40445e-05	0.925415	NA	NA	1.21714
rs117333627	1.78729	0.266047	-0.0994984	1.66006e-06	0.702476	NA	NA	5.27342
rs3760739	-0.509126	0.269604	0.0246384	1.48367e-05	0.715751	NA	NA	4.61597
rs8052308	-1.48346	0.27033	-0.00724423	8.5727e-06	0.971507	NA	NA	0.485959
rs1489672	0.464757	0.274578	0.113254	1.06352e-05	0.0760223	NA	NA	19.5938
rs115195951	2.56225	0.292761	0.638341	8.5171e-06	0.0823658	NA	NA	19.9445
rs12232572	-1.77757	0.296421	-0.461518	3.76676e-06	0.0835258	NA	NA	20.6119
rs57519512	2.14883	0.298066	0.2481	4.69889e-07	0.480679	NA	NA	10.3507
rs72553952	-3.16144	0.299239	0.514893	1.21035e-06	0.3036	NA	NA	14.0056
rs7160733	0.455283	0.303893	0.112539	1.80393e-05	0.0804848	NA	NA	19.8194
rs34362304	-0.725867	0.30691	-0.206435	2.52743e-06	0.075157	NA	NA	22.1425
rs10967875	-0.538925	0.307922	0.158979	1.45801e-05	0.0407826	NA	NA	22.7794
rs60056594	-2.93163	0.30799	0.865928	1.42626e-05	0.0407731	NA	NA	22.8022
JHU_1.210428777	0.492163	0.310263	-0.157219	3.17071e-06	0.0400935	NA	NA	24.2106
rs114051767	-3.52811	0.310403	0.601271	1.14723e-06	0.293618	NA	NA	14.5608
rs59285907	2.3366	0.31326	0.595459	1.46196e-05	0.0803449	NA	NA	20.3085
rs149276357	2.58178	0.313665	0.310258	4.72667e-07	0.477177	NA	NA	10.728
rs147366834	-4.53179	0.315649	0.855216	1.26001e-07	0.289028	NA	NA	15.8755
rs1869827	-1.85935	0.318206	0.345302	4.79955e-07	0.277398	NA	NA	15.6624
rs55730213	0.669592	0.318246	-0.0351604	1.04437e-05	0.725553	NA	NA	4.98903
rs79243018	-3.71874	0.323451	-0.0312587	1.3243e-05	0.955144	NA	NA	0.833567
rs17171504	0.769186	0.329624	-0.257854	2.4719e-06	0.0406022	NA	NA	25.1065
rs34362304.1	-0.678505	0.336434	-0.208509	3.54736e-06	0.0638534	NA	NA	23.5068
rs60716510	-1.83242	0.339229	-0.556051	3.22443e-06	0.0660051	NA	NA	23.2806
rs2139515	0.699084	0.341298	-0.223492	1.06394e-05	0.0416346	NA	NA	24.2248
rs544207972	-2.59431	0.341708	0.368379	2.62914e-06	0.513743	1.13862e-07	0.214946	12.4339
rs568099192	-2.59214	0.342118	0.368455	2.59749e-06	0.507137	1.11922e-07	0.211568	12.4453
rs72789334	0.780739	0.344822	0.0987776	1.19503e-06	0.467252	NA	NA	11.2309
rs144659455	-4.33849	0.346888	0.834633	6.35046e-07	0.283054	NA	NA	16.134
rs6079722	0.556135	0.35392	-0.0347983	8.7406e-06	0.700257	NA	NA	5.88871
rs77051500	1.82007	0.354727	0.542962	3.09788e-06	0.0805995	NA	NA	22.9774
rs865885084	-2.03416	0.358231	-0.570793	1.60562e-05	0.0779893	NA	NA	21.9119
rs73624941	1.40122	0.371163	0.416788	1.20108e-05	0.0732505	NA	NA	22.9255
rs145873923	-4.62828	0.372307	1.54851	1.41275e-05	0.0426685	NA	NA	25.0698
rs73814310	-0.435712	0.372358	-0.144155	1.24134e-05	0.0495563	NA	NA	24.86
rs4561537	0.733609	0.384118	0.251891	8.4628e-06	0.049351	NA	NA	25.5597
rs116202570	-3.22078	0.384953	1.45055	1.54088e-08	0.0406536	NA	NA	31.0522
rs76401327	1.08535	0.387656	0.330738	1.5142e-05	0.0729349	NA	NA	23.3557
rs114674819	5.40968	0.391778	0.775808	9.67849e-07	0.458607	NA	NA	12.5424
rs192482164	-3.89474	0.393699	-0.087699	5.08492e-07	0.910026	NA	NA	2.20214
rs151079256	-3.07938	0.402421	1.20465	1.83408e-06	0.0427155	NA	NA	28.1196
rs146025181	-4.32428	0.405332	0.868844	1.26407e-06	0.307911	NA	NA	16.7307
rs150123805	-3.76604	0.414887	0.947685	4.77347e-09	0.298963	NA	NA	20.1048
rs17013105	3.24228	0.422251	-0.196137	8.31814e-06	0.747885	NA	NA	5.70429
rs138951419	-2.88532	0.438108	1.11728	1.06527e-05	0.0443675	NA	NA	27.9139
rs111267874	0.60017	0.440909	-0.0703739	3.82807e-06	0.576068	NA	NA	10.495
rs112434816	-0.546148	0.450656	0.220618	3.87755e-06	0.0574986	NA	NA	28.7725
rs116866072	-2.7462	0.462425	-0.051677	1.66944e-05	0.924472	NA	NA	1.84701
rs17176375	0.605057	0.463857	-0.248756	9.41037e-06	0.0450113	NA	NA	29.1347
rs79270317	-2.54316	0.464331	1.0367	1.19117e-05	0.0447293	NA	NA	28.9593
rs142628952	-1.20024	0.468657	-0.0228507	3.54194e-06	0.92996	NA	NA	1.86827
rs76250915.COSV60756928	0.730384	0.469288	0.334528	1.6585e-06	0.0471528	NA	NA	31.4137
rs79930079	4.50753	0.472586	1.71266	6.44006e-06	0.0743113	NA	NA	27.5338
rs115260164	1.32665	0.473599	0.138536	1.51946e-05	0.427501	3.58568e-07	0.291468	9.45518
JHU_X.443544	-2.91545	0.475198	0.736042	1.23052e-07	0.313257	NA	NA	20.1573
rs74392178	-1.16239	0.476833	-0.0228685	1.90483e-06	0.930811	NA	NA	1.92941
rs3760440	0.330751	0.479713	-0.14372	6.04628e-06	0.0452895	NA	NA	30.2906
rs16866524	0.470056	0.481336	0.00961893	7.45095e-06	0.924346	NA	NA	2.0053
rs72814539	-0.772745	0.484585	-0.333125	2.11001e-06	0.0607489	NA	NA	30.1234
rs10824740.COSV57889469	-0.32401	0.486273	-0.127088	6.62583e-06	0.0737412	NA	NA	28.1731
rs10824740.COSV57889469.1	-0.321071	0.490431	-0.130103	6.35094e-06	0.0679889	NA	NA	28.8365
rs151024901	-2.11911	0.495475	-0.0465124	1.74268e-05	0.91813	NA	NA	2.14776
rs77769808	0.944842	0.496642	0.368563	1.33097e-05	0.0725619	NA	NA	28.0616
rs144647750	2.04465	0.497153	-0.141697	5.66067e-06	0.759492	NA	NA	6.481
rs6536093	-0.315228	0.498766	0.0203164	1.82947e-05	0.763975	NA	NA	6.05475
rs12294553	1.48257	0.503719	-0.107596	3.08009e-06	0.758648	NA	NA	6.76635
rs74606713	-4.23257	0.508018	1.35057	3.71092e-07	0.27277	9.5897e-07	0.0217624	24.1902
rs17071497	-4.23257	0.508018	1.35057	3.71092e-07	0.27277	9.5897e-07	0.0217624	24.1902
rs139978877	4.19608	0.508165	-0.295169	5.86237e-06	0.761636	NA	NA	6.57211
rs115737163	0.861071	0.510537	-0.403254	5.19485e-06	0.0460629	NA	NA	31.8948
rs114313699	-1.48567	0.512821	-0.606773	1.53346e-05	0.068659	NA	NA	28.9983
rs138291117	3.39381	0.514373	-0.234853	8.96328e-06	0.764201	NA	NA	6.47215
JHU_11.41911004	0.289415	0.518135	0.00178084	8.81494e-06	0.978987	NA	NA	0.611561
rs4756680	0.285801	0.523012	0.00570873	4.31832e-06	0.934688	NA	NA	1.95834
rs28667046	-0.393717	0.526304	0.183165	1.24267e-05	0.0467105	NA	NA	31.7508
rs9560371	1.46887	0.527309	-0.109277	3.82067e-06	0.763729	NA	NA	6.92439
rs73630199	-2.28342	0.531084	-0.100411	4.73916e-06	0.859152	NA	NA	4.21217
rs6557316	-0.267238	0.545494	0.136196	4.77006e-06	0.046956	NA	NA	33.7592
rs6557316.1	-0.267238	0.545494	0.136196	4.77006e-06	0.046956	NA	NA	33.7592
rs114834396	1.50304	0.545577	0.683678	6.79723e-06	0.0715093	NA	NA	31.265
rs148764537.COSV61115419	2.08209	0.54866	0.468356	2.31913e-07	0.440621	NA	NA	18.3637
rs62443591	0.499849	0.54901	-0.244563	9.78127e-06	0.0506917	NA	NA	32.8531
imm_16_73886981	-0.267443	0.550509	-0.143593	1.45516e-06	0.0499044	NA	NA	34.9345
rs2203088	-0.247398	0.551548	-0.113883	7.41239e-06	0.0712112	NA	NA	31.522
rs35508255	1.36691	0.55327	-0.101622	8.03796e-06	0.770672	NA	NA	6.91995
imm_16_73886092	-0.265738	0.55368	-0.1377	1.65612e-06	0.0586587	NA	NA	34.1316
rs79152278	1.28718	0.556701	0.283121	1.1892e-06	0.431597	NA	NA	18.0297
rs147847023	2.28702	0.566773	1.22108	6.37279e-06	0.0505175	NA	NA	34.8074
rs113500977	1.56654	0.573237	0.359491	1.38235e-06	0.428841	NA	NA	18.6649
rs17686457	-0.25507	0.574377	0.136577	7.43124e-06	0.0477946	NA	NA	34.8725
rs79174017	1.39688	0.5798	-0.117061	2.30066e-06	0.771729	NA	NA	7.73221
rs2056862	-0.229984	0.586777	0.137541	1.24768e-06	0.0477796	NA	NA	37.4236
rs10843210	0.236005	0.587158	0.114849	1.81739e-05	0.0691512	NA	NA	32.7341
rs145884040	-1.65761	0.587907	1.11659	8.32742e-06	0.20719	9.32701e-09	0.504589	40.249
rs141023519	-0.909325	0.589611	-0.0310217	1.21442e-05	0.901252	NA	NA	3.29897
rs117225291	0.940832	0.595899	0.470181	1.74285e-05	0.068912	NA	NA	33.3222
JHU_X.68616542	-0.676712	0.596432	-0.0349772	1.02729e-05	0.855671	NA	NA	4.91468
rs148433271	2.71384	0.59809	1.43208	6.01429e-06	0.0698065	NA	NA	34.5419
rs538287	-0.232842	0.605818	-0.115941	1.60709e-05	0.0803873	NA	NA	33.2416
rs150977137	2.61596	0.613322	1.38301	1.80518e-05	0.0663738	NA	NA	34.5842
rs1452787	0.259922	0.614942	0.148	3.13456e-06	0.069805	NA	NA	36.2815
rs184301693	-1.74207	0.618586	0.557755	1.05699e-06	0.334537	NA	NA	24.252
rs864821	-0.361061	0.623765	0.210474	1.82785e-05	0.0491802	NA	NA	36.826
rs16938394	-0.742879	0.628121	-0.0296021	1.16752e-05	0.896593	NA	NA	3.83209
rs4457736	-0.742879	0.628121	-0.0296021	1.16752e-05	0.896593	NA	NA	3.83209
rs144113658	0.804542	0.631152	-0.486135	1.35915e-05	0.049306	NA	NA	37.6651
rs373885001	1.90222	0.634341	-0.163658	9.75047e-06	0.784753	NA	NA	7.92198
rs77648144	0.804859	0.637184	-0.0682333	1.37566e-05	0.786064	NA	NA	7.81513
rs147319068	-2.45154	0.638371	-0.106775	9.28213e-07	0.901853	NA	NA	4.17365
rs190535783	1.27257	0.638963	-0.107316	1.59531e-05	0.786715	NA	NA	7.77718
imm_16_73876147	-0.211834	0.639429	-0.139422	1.92232e-06	0.0559533	NA	NA	39.6925
imm_16_73878328	-0.211834	0.639429	-0.139422	1.92232e-06	0.0559533	NA	NA	39.6925
rs182884588	1.07385	0.641906	-0.0932153	1.10966e-05	0.786288	NA	NA	7.98718
rs114464446	1.07385	0.641906	-0.0932153	1.10966e-05	0.786288	NA	NA	7.98718
rs141944886	2.09503	0.643247	-0.180671	6.80564e-06	0.79337	NA	NA	7.93915
rs115876643	-1.28999	0.645228	0.448433	8.20791e-07	0.337394	NA	NA	25.7955
rs76385638	-1.35244	0.645292	-0.0579036	2.67944e-07	0.909838	NA	NA	4.10564
rs55927720	-0.230794	0.650141	0.156815	3.64577e-06	0.0495892	NA	NA	40.457
rs76108114	-1.49885	0.650848	-0.0675728	4.53778e-06	0.895443	NA	NA	4.31383
rs10437747	-0.402104	0.653738	-0.25286	5.06607e-06	0.0681233	NA	NA	38.6067
imm_16_73870986	-0.202394	0.654863	-0.138625	2.40726e-06	0.0553646	NA	NA	40.6502
rs28564459	-1.25166	0.657248	0.500468	4.72279e-08	0.336274	NA	NA	28.5635
rs4437734	0.210405	0.659592	0.133542	8.7755e-06	0.0637854	NA	NA	38.8263
rs191830054	1.95281	0.659777	-1.4183	1.55248e-05	0.0295832	NA	NA	42.0721
rs73063039	0.910253	0.661517	-0.0958259	1.36807e-05	0.754576	NA	NA	9.52469
rs73029631	-0.89384	0.670997	0.0885	3.64262e-06	0.788511	NA	NA	9.00911
rs150475809	-2.22082	0.671657	-0.107172	1.63548e-05	0.888603	NA	NA	4.60362
imm_16_73889068	-0.189769	0.673216	-0.13904	2.01326e-06	0.054972	NA	NA	42.2859
rs115423851	1.22965	0.680512	0.846746	4.82699e-06	0.0673118	NA	NA	40.7795
imm_16_73992379	-0.184827	0.686283	-0.154005	5.56694e-07	0.0499437	NA	NA	45.4518
rs59894521	-0.866552	0.691567	-0.0303765	1.21601e-07	0.93804	NA	NA	3.38672
JHU_16.75331043	-0.177038	0.694039	-0.137004	2.21984e-06	0.0577705	NA	NA	43.626
imm_16_73888545	-0.177038	0.694039	-0.137004	2.21984e-06	0.0577705	NA	NA	43.626
imm_16_73994062	-0.177484	0.696533	-0.145828	6.77089e-07	0.0569328	NA	NA	45.1043
rs114687431	-0.953046	0.702052	0.704023	9.6776e-06	0.0600619	NA	NA	42.4861
imm_16_73878532	-0.16415	0.716382	-0.14831	4.51926e-07	0.054661	NA	NA	47.4654
imm_16_73880074	-0.16415	0.716382	-0.14831	4.51926e-07	0.054661	NA	NA	47.4654
imm_16_73881341	-0.16415	0.716382	-0.14831	4.51926e-07	0.054661	NA	NA	47.4654
rs80307148	1.21386	0.719536	0.978405	3.28961e-06	0.06637	NA	NA	44.6298
rs113368918	1.01826	0.727779	0.826583	9.28941e-06	0.0603059	NA	NA	44.8051
imm_16_73877217	-0.157219	0.72787	-0.147636	5.34429e-07	0.0542417	NA	NA	48.4282
rs7710712	1.13042	0.728124	0.443024	1.07808e-06	0.4091	NA	NA	28.1564
rs117859772	1.7875	0.72947	1.45167	9.97285e-06	0.0615764	NA	NA	44.816
imm_16_73989835	-0.156533	0.730137	-0.145592	8.91445e-07	0.0538948	NA	NA	48.1893
imm_16_73883434	-0.154737	0.73142	-0.148605	4.21222e-07	0.0542733	NA	NA	48.9892
rs145087122	2.9714	0.737679	2.52452	5.20932e-06	0.0655654	NA	NA	45.9344
rs138637165.CM1611198	2.97243	0.737734	2.51391	5.32608e-06	0.0667395	NA	NA	45.8212
rs117100657	2.96802	0.738424	2.56185	5.29182e-06	0.0625719	NA	NA	46.3275
rs138766114	1.01059	0.738607	-0.110221	1.80575e-05	0.802217	NA	NA	9.83401
rs148141096	1.01059	0.738607	-0.110221	1.80575e-05	0.802217	NA	NA	9.83401
rs148475876	2.95116	0.739604	2.51904	5.1413e-06	0.0665334	NA	NA	46.0502
rs28730722.COSV54862081	2.95108	0.739741	2.51404	5.32261e-06	0.0669408	NA	NA	46.0016
rs41303348	2.94507	0.739974	2.52608	5.14553e-06	0.0654552	NA	NA	46.1709
rs200749025	2.94507	0.739974	2.52608	5.14553e-06	0.0654552	NA	NA	46.1709
rs147526482	2.94507	0.739974	2.52608	5.14553e-06	0.0654552	NA	NA	46.1709
rs201288428.COSV55830330	2.94507	0.739974	2.52608	5.14553e-06	0.0654552	NA	NA	46.1709
rs150470903	2.94507	0.739974	2.52608	5.14553e-06	0.0654552	NA	NA	46.1709
rs145975508.COSV61734445	2.94507	0.739974	2.52608	5.14553e-06	0.0654552	NA	NA	46.1709
rs199968197	2.94507	0.739974	2.52608	5.14553e-06	0.0654552	NA	NA	46.1709
rs149736299	2.94507	0.739974	2.52608	5.14553e-06	0.0654552	NA	NA	46.1709
X15.45412400.GAGA.G	2.94507	0.739974	2.52608	5.14553e-06	0.0654552	NA	NA	46.1709
rs368081185.COSV60889751	2.94507	0.739974	2.52608	5.14553e-06	0.0654552	NA	NA	46.1709
rs144333393	2.94507	0.739974	2.52608	5.14553e-06	0.0654552	NA	NA	46.1709
rs539897980	2.94507	0.739974	2.52608	5.14553e-06	0.0654552	NA	NA	46.1709
rs141623013.COSV100652098	2.94507	0.739974	2.52608	5.14553e-06	0.0654552	NA	NA	46.1709
imm_16_73897732	-0.148914	0.742452	-0.152168	3.7959e-07	0.0509542	NA	NA	50.5404
imm_16_73954382	-0.148211	0.743193	-0.143154	1.33575e-06	0.0533222	NA	NA	49.1322
imm_16_73980261	-0.148211	0.743193	-0.143154	1.33575e-06	0.0533222	NA	NA	49.1322
imm_16_73894180	-0.147963	0.74326	-0.14615	7.39683e-07	0.0536388	NA	NA	49.6917
rs773905945.COSV51657690	2.88832	0.744709	2.5552	5.16927e-06	0.0624051	NA	NA	46.9403
imm_16_73923590	-0.146708	0.74588	-0.153106	8.74253e-07	0.0428028	NA	NA	51.0669
imm_16_73872130	-0.144964	0.74911	-0.163637	3.64573e-07	0.0363856	NA	NA	53.0254
rs116170736	0.415205	0.749121	0.387046	2.07902e-06	0.0641868	NA	NA	48.245
imm_16_73980404	-0.14481	0.749571	-0.145742	9.52727e-07	0.0530915	NA	NA	50.1603
imm_16_73889073	-0.143081	0.750753	-0.148398	4.56503e-07	0.0536894	NA	NA	50.9121
imm_16_73942660	-0.139207	0.760105	-0.14632	8.86694e-07	0.0540015	NA	NA	51.2455
imm_16_73953278	-0.137991	0.760292	-0.151059	3.88023e-07	0.052016	NA	NA	52.2606
rs565615420	2.71201	0.760389	2.74213	5.56905e-06	0.0468901	NA	NA	50.2762
rs4707795	0.168108	0.760515	-0.0219019	2.69853e-06	0.8026	NA	NA	11.5267
rs9463642	0.881255	0.762876	0.83123	6.11081e-06	0.0635914	NA	NA	48.5394
rs11121727	-0.419365	0.764351	0.0535808	5.10631e-06	0.804133	NA	NA	11.3292
rs11121727.1	-0.419365	0.764351	0.0535808	5.10631e-06	0.804133	NA	NA	11.3292
rs115054514	0.547762	0.76723	0.514696	6.1242e-06	0.0965113	5.31737e-07	0.976559	48.4439
rs139077812.COSV99056053	1.51292	0.768175	1.50572	2.70777e-06	0.065013	NA	NA	49.8807
rs117711504	-1.50474	0.771402	1.67206	8.67307e-07	0.0526658	NA	NA	52.6333
rs150026771	1.82977	0.774157	-0.293806	7.02734e-08	0.800271	NA	NA	13.8354
imm_16_73889836	-0.127446	0.777425	-0.145913	5.52489e-07	0.0564068	NA	NA	53.3778
rs76318746	-1.46388	0.778341	-0.127846	4.21992e-06	0.874603	NA	NA	8.03193
rs143037153	-1.46388	0.778341	-0.127846	4.21992e-06	0.874603	NA	NA	8.03193
rs190073949	-1.44549	0.779951	1.61458	8.61722e-07	0.0612717	NA	NA	52.7629
rs79066822	0.752932	0.782448	-0.100319	8.1985e-06	0.807598	NA	NA	11.7573
rs56173940	-0.329095	0.785199	0.184333	1.16059e-06	0.353581	NA	NA	35.9024
imm_16_73958614	-0.12292	0.786543	-0.155432	7.8723e-07	0.048753	NA	NA	55.8399
rs799240	0.780036	0.789714	-0.100977	7.80778e-06	0.819763	NA	NA	11.4614
imm_16_73901977	-0.116618	0.797872	-0.153142	2.94927e-07	0.0526129	NA	NA	56.7697
rs10514393	-0.116618	0.797872	-0.153142	2.94927e-07	0.0526129	NA	NA	56.7697
rs557069225	0.691378	0.798603	-0.0952459	1.65074e-05	0.809813	NA	NA	12.1082
rs77205182	0.352834	0.803455	0.402015	6.57715e-06	0.063481	NA	NA	53.2576
imm_16_73973332	-0.110592	0.806799	-0.14016	2.6832e-06	0.0513574	NA	NA	55.896
rs799240.1	0.714408	0.8072	-0.0902888	8.64007e-06	0.838112	NA	NA	11.2202
rs824883	0.160254	0.81195	0.19475	4.30415e-06	0.0634717	NA	NA	54.8585
COSV62923459	-0.1036	0.817163	-0.145409	8.53434e-07	0.0516193	NA	NA	58.3952
rs118120551	0.807564	0.817244	-0.122495	1.38645e-05	0.812172	NA	NA	13.1707
imm_16_73929245	-0.103932	0.819087	-0.14461	1.43115e-06	0.0513402	NA	NA	58.1834
rs72857725	-0.382721	0.81951	0.544703	2.17548e-06	0.0430533	NA	NA	58.7329
imm_16_73993232	-0.102887	0.820482	-0.152901	4.06466e-07	0.0493949	NA	NA	59.7764
imm_16_73943850	-0.10298	0.821362	-0.145895	1.25993e-06	0.05134	NA	NA	58.622
rs4888383	-0.10298	0.821362	-0.145895	1.25993e-06	0.05134	NA	NA	58.622
imm_16_74006677	-0.0974115	0.830195	-0.151666	4.03814e-07	0.0516092	NA	NA	60.8911
rs56916745	0.792718	0.831759	0.525854	8.86182e-07	0.396846	NA	NA	39.8805
rs73953618	-0.959626	0.831859	-0.819465	1.91925e-08	0.339325	NA	NA	46.0609
COSV52209447	-0.0962634	0.832152	-0.151889	5.62451e-07	0.048543	NA	NA	61.208
imm_16_74003176	-0.0960623	0.832355	-0.151895	3.66807e-07	0.0519976	NA	NA	61.2585
rs114823866	0.452526	0.832779	0.641076	1.35391e-06	0.0679226	NA	NA	58.6206
imm_1_153369771	0.0935821	0.835068	-0.0676799	1.22682e-06	0.359116	NA	NA	41.9689
imm_16_73945935	-0.0943493	0.835353	-0.148136	9.19424e-07	0.0497817	NA	NA	61.0907
rs372042	0.125564	0.835572	0.166161	1.56179e-05	0.0610095	NA	NA	56.9582
rs13183250	0.137324	0.836021	0.188127	7.10513e-06	0.0625413	NA	NA	57.8051
rs117129608	-0.806042	0.840292	1.1521	1.02001e-05	0.0542778	NA	NA	58.8364
imm_16_74041307	0.088941	0.842641	-0.148705	1.20306e-06	0.0436001	NA	NA	62.5742
imm_16_73917597	-0.088769	0.843927	-0.141869	2.03979e-06	0.0505786	NA	NA	61.5115
imm_16_74012949	-0.0887297	0.844785	-0.148601	6.32286e-07	0.0520467	NA	NA	62.6135
imm_16_73999114	-0.0883008	0.845941	-0.15156	4.71198e-07	0.0506849	NA	NA	63.1866
imm_16_73893931	-0.0881074	0.846001	-0.150333	8.44411e-07	0.0477169	NA	NA	63.0484
rs2303430.COSV99958199	0.096778	0.846427	-0.141721	1.02607e-05	0.0584325	NA	NA	59.4221
COSV52208992	-0.0861474	0.849112	-0.150957	4.47759e-07	0.0510744	NA	NA	63.667
rs114698522	0.40665	0.849651	0.652949	1.34846e-06	0.0629679	NA	NA	61.6223
imm_16_74011905	-0.0824617	0.855754	-0.1526	3.88368e-07	0.0503478	NA	NA	64.9192
imm_16_73985598	-0.0822372	0.856065	-0.152208	3.75727e-07	0.0509656	NA	NA	64.9226
imm_16_73985807	-0.0822372	0.856065	-0.152208	3.75727e-07	0.0509656	NA	NA	64.9226
imm_16_73995970	-0.0822372	0.856065	-0.152208	3.75727e-07	0.0509656	NA	NA	64.9226
imm_16_73999861	-0.0822372	0.856065	-0.152208	3.75727e-07	0.0509656	NA	NA	64.9226
imm_16_74007540	-0.0822372	0.856065	-0.152208	3.75727e-07	0.0509656	NA	NA	64.9226
imm_16_73993732	-0.0821984	0.856333	-0.157279	3.80004e-07	0.0443041	NA	NA	65.6759
imm_16_73960563	-0.0827551	0.856384	-0.150668	5.68069e-07	0.052119	NA	NA	64.5471
imm_16_73989331	-0.0816237	0.857202	-0.153089	3.79727e-07	0.0498018	NA	NA	65.224
rs1996707	-0.815012	0.859358	-0.124362	4.55624e-06	0.861734	NA	NA	13.2388
imm_16_73988310	-0.0802255	0.859513	-0.150508	9.04079e-07	0.0464346	NA	NA	65.2303
imm_16_73990575	-0.0800496	0.859824	-0.157413	3.85729e-07	0.0434255	NA	NA	66.2896
imm_16_73963380	-0.0803151	0.860084	-0.148437	1.08218e-06	0.0489614	NA	NA	64.89
imm_16_73994214	-0.0797491	0.860756	-0.142901	8.01283e-07	0.0604499	NA	NA	64.1819
imm_16_73966482	-0.0781169	0.863133	-0.146114	2.29771e-06	0.0441849	NA	NA	65.1622
rs872241	0.0767363	0.864006	-0.015056	1.27267e-05	0.820243	NA	NA	16.4022
COSV52212082	-0.0770447	0.865149	-0.148903	1.25787e-06	0.0459726	NA	NA	65.9016
imm_16_74001317	-0.0767598	0.865183	-0.150432	3.84938e-07	0.0529791	NA	NA	66.2137
rs7656250	0.0866979	0.865589	0.145068	7.8053e-06	0.0616989	NA	NA	62.5925
X8.10622924.TTTC.T	-0.58723	0.865636	0.686958	1.98198e-06	0.248333	1.53593e-06	0.024826	53.9134
rs242682	0.342226	0.865989	-0.0721371	4.06694e-06	0.819664	NA	NA	17.4092
imm_16_74000684	-0.0759343	0.86712	-0.148441	5.28037e-07	0.0542509	NA	NA	66.1574
imm_16_73870049	-0.0753825	0.867717	-0.137894	3.60594e-06	0.0524915	NA	NA	64.655
imm_16_73980318	-0.0744476	0.869213	-0.149802	5.65981e-07	0.0504694	NA	NA	66.8014
imm_16_73985697	-0.0744476	0.869213	-0.149802	5.65981e-07	0.0504694	NA	NA	66.8014
imm_16_73999644	-0.0744476	0.869213	-0.149802	5.65981e-07	0.0504694	NA	NA	66.8014
imm_16_73999645	-0.0744476	0.869213	-0.149802	5.65981e-07	0.0504694	NA	NA	66.8014
imm_16_73951649	-0.0726193	0.872195	-0.152203	2.93578e-07	0.0521895	NA	NA	67.6993
imm_16_73981655	-0.0726113	0.872221	-0.14603	1.08731e-06	0.0501441	NA	NA	66.7898
imm_16_74028077	-0.0721538	0.872973	-0.140846	1.94146e-06	0.0530935	NA	NA	66.1249
imm_16_73955753	-0.0714693	0.874137	-0.154033	3.0714e-07	0.0489428	NA	NA	68.3066
imm_16_73942919	-0.0711794	0.875748	-0.139692	1.98805e-06	0.0570923	NA	NA	66.2451
rs12424587	0.454534	0.876971	-0.0982796	1.11944e-05	0.822047	NA	NA	17.7781
imm_16_73954492	-0.0693067	0.877924	-0.153064	2.98945e-07	0.05049	NA	NA	68.8328
imm_16_73954788	-0.0693067	0.877924	-0.153064	2.98945e-07	0.05049	NA	NA	68.8328
imm_16_73950853	-0.0690222	0.878922	-0.152871	4.80061e-07	0.0478966	NA	NA	68.894
imm_16_73973276	-0.0671398	0.881903	-0.14815	7.43495e-07	0.0506493	NA	NA	68.8142
rs114474404	-0.600629	0.882591	-0.122058	4.58338e-07	0.860319	NA	NA	16.8894
imm_16_74008671	-0.0663941	0.883611	-0.150089	4.2406e-07	0.053416	NA	NA	69.3306
imm_16_73958247	-0.0661645	0.883964	-0.151493	4.67126e-07	0.0501704	NA	NA	69.6016
rs115436176	0.308749	0.884037	0.340263	1.19844e-07	0.369579	NA	NA	52.4279
rs1408282	0.100763	0.884597	-0.0225181	1.7829e-05	0.823473	NA	NA	18.2656
rs10984980.COSV52962906	-0.125334	0.885576	-0.0238976	6.61594e-06	0.857313	NA	NA	16.0138
COSV52210145	-0.065189	0.885815	-0.15359	3.56862e-07	0.049747	NA	NA	70.2032
rs9727148	-0.356353	0.888029	0.806199	2.09847e-06	0.0479123	NA	NA	69.3473
JHU_16.75442142	-0.0621492	0.890853	-0.146526	8.01291e-07	0.0530396	NA	NA	70.2172
rs6777050	-0.0693016	0.893262	0.160293	1.66948e-06	0.0558202	NA	NA	69.8156
COSV52211687	-0.0584354	0.897199	-0.147703	6.38324e-07	0.0529041	NA	NA	71.6523
imm_16_73968664	-0.0567513	0.900705	-0.145839	1.81923e-06	0.0477824	NA	NA	71.9871
JHU_16.75422816	-0.0557551	0.902001	-0.155711	3.88575e-07	0.0454484	NA	NA	73.634
JHU_3.102967266	-0.058748	0.909548	0.164333	1.70395e-06	0.0502755	NA	NA	73.6652
imm_16_74024348	-0.0508574	0.909667	-0.143849	1.47569e-06	0.0491358	NA	NA	73.8799
rs1351158	-0.183343	0.910185	0.364533	4.04305e-06	0.24512	3.84902e-07	0.0253116	66.5357
rs9409617	0.0724578	0.914053	-0.0220863	8.46897e-06	0.827359	NA	NA	23.3608
imm_16_74024197	-0.0479141	0.914972	-0.143402	1.59813e-06	0.0494889	NA	NA	74.9556
rs74839819	-0.232797	0.915932	-0.103172	9.96239e-06	0.757914	NA	NA	30.7089
rs74118705	-0.102012	0.916476	0.0348679	3.00331e-06	0.820765	NA	NA	25.4733
imm_16_73975421	-0.0472841	0.916634	-0.147377	6.26874e-07	0.0532998	NA	NA	75.7095
rs189345325	-0.419857	0.91713	1.20477	3.39244e-06	0.0585031	NA	NA	74.1567
imm_16_74003106	-0.0426865	0.925369	-0.146952	5.89886e-07	0.0575424	NA	NA	77.4905
rs142417959	-0.57839	0.926589	1.79812	9.58355e-06	0.056367	NA	NA	75.6622
imm_16_73962475	-0.039746	0.930042	-0.148495	8.864e-07	0.048821	NA	NA	78.8856
imm_16_74040633	-0.0371391	0.934754	-0.145727	1.53867e-06	0.0485354	NA	NA	79.6905
JHU_15.57537722	-0.247337	0.934975	0.467728	3.52815e-07	0.37042	NA	NA	65.4106
imm_16_73989891	-0.0365697	0.9356	-0.15056	6.16981e-07	0.048802	NA	NA	80.4576
imm_16_74033864	0.0349725	0.938084	-0.145228	1.91476e-06	0.0456213	NA	NA	80.5924
imm_16_74033952	0.0349725	0.938084	-0.145228	1.91476e-06	0.0456213	NA	NA	80.5924
imm_16_74019330	-0.033294	0.941074	-0.148927	7.38476e-07	0.0486146	NA	NA	81.7288
imm_16_74020214	-0.033294	0.941074	-0.148927	7.38476e-07	0.0486146	NA	NA	81.7288
rs73723635	-0.191815	0.941134	0.422493	7.16916e-08	0.371589	NA	NA	68.7754
rs9409438	0.0503195	0.941331	-0.0213466	1.48403e-05	0.831533	NA	NA	29.7862
imm_16_74046436	-0.0294878	0.948096	-0.141966	1.39015e-06	0.0554032	NA	NA	82.8013
imm_16_73983054	-0.0290599	0.948664	-0.148122	9.20573e-07	0.0483673	NA	NA	83.5988
imm_16_73950632	-0.0277897	0.951128	-0.152441	4.83081e-07	0.0485006	NA	NA	84.5811
imm_16_73972842	-0.026679	0.953097	-0.151004	1.32533e-06	0.0428772	NA	NA	84.9851
imm_16_73960625	-0.0260384	0.954222	-0.147949	1.19078e-06	0.0475742	NA	NA	85.0343
COSV52210879	-0.0257649	0.954678	-0.147587	1.15285e-06	0.0481597	NA	NA	85.1372
imm_16_73968946	-0.0257649	0.954678	-0.147587	1.15285e-06	0.0481597	NA	NA	85.1372
imm_16_73969022	-0.0257649	0.954678	-0.147587	1.15285e-06	0.0481597	NA	NA	85.1372
imm_16_73969120	-0.0257649	0.954678	-0.147587	1.15285e-06	0.0481597	NA	NA	85.1372
imm_16_73970408	-0.0257649	0.954678	-0.147587	1.15285e-06	0.0481597	NA	NA	85.1372
imm_16_73971877	-0.0244138	0.95677	-0.146601	8.28722e-07	0.0513018	NA	NA	85.7242
rs182225157	-0.27793	0.958367	-0.169708	1.01357e-06	0.847196	NA	NA	37.912
imm_16_73950307	-0.0224821	0.960162	-0.140985	6.20627e-07	0.0642293	NA	NA	86.2468
rs78835307	0.0790916	0.960771	0.450983	1.7321e-05	0.055197	NA	NA	85.0792
imm_16_73929421	0.0217034	0.961781	-0.154271	4.37143e-07	0.0464491	NA	NA	87.6667
rs35263058	-0.0207883	0.963344	-0.150901	6.19471e-07	0.0481345	NA	NA	87.8919
rs11857175	0.035559	0.963815	-0.117561	6.29977e-07	0.373543	NA	NA	76.777
imm_16_74029923	0.0202678	0.963847	-0.140113	3.58961e-06	0.0460567	NA	NA	87.3627
imm_16_73951900	-0.0204109	0.964029	-0.150678	6.35611e-07	0.048502	NA	NA	88.07
rs143857932	-0.284579	0.964245	-0.191127	8.63802e-06	0.842017	NA	NA	40.1776
COSV52210893	0.0192208	0.966348	-0.14527	7.3912e-07	0.0590717	NA	NA	88.3149
rs117189518	-0.265249	0.966613	-0.295622	8.7007e-06	0.757238	NA	NA	52.7076
imm_16_74019582	-0.0176121	0.968819	-0.146834	8.30493e-07	0.0510019	NA	NA	89.2901
imm_16_74006422	-0.0153066	0.973125	-0.146783	9.68555e-07	0.0518984	NA	NA	90.5567
rs8082814	0.0494232	0.974331	0.226983	6.31865e-07	0.38111	NA	NA	82.1194
imm_16_73969763	-0.0112015	0.98028	-0.157042	1.47095e-06	0.0339945	NA	NA	93.3421
rs116324835	0.0468077	0.982514	-0.0650515	1.17266e-05	0.837466	NA	NA	58.1548
imm_16_74035948	-0.00934916	0.983563	-0.147713	1.2506e-06	0.0474695	NA	NA	94.0475
rs2494732.COSV62573275	0.00708643	0.986921	0.134782	1.07183e-06	0.0591464	NA	NA	95.0049
rs11914543	0.0215655	0.988043	0.447385	1.15864e-06	0.0590922	NA	NA	95.4013
imm_16_74028487	0.00141026	0.997483	-0.141488	2.61847e-06	0.0468573	NA	NA	99.0131
